# Supplementary material for: Phosphite–imidazole catalyzed N-formylation and N-acylation of amines
Source: Royal Society of Chemistry journal article supplement (doi:10.1039/d3ob01306e), 2023-01-01
Supplement: d3ob01306e1.pdf [file d3ob01306e1.pdf]

# Phosphite-Imidazole Catalyzed *N*-Formylation and *N*- Acylation of Amines

*Babak Kaboudin,<sup>\*a</sup> Hesam Esfandiari,<sup>a</sup> Meysam Kakavand,<sup>a</sup> Masoumeh Sohrabi,<sup>a</sup> Elahe Yousefian Amirkhiz,<sup>a</sup> Abdollah Neshat,<sup>a</sup> Teru Kawazoe,<sup>b</sup> Haruhiko Fukaya,<sup>b</sup> Hikaru Yanai<sup>\*b</sup>*

<sup>a\*</sup>Department of Chemistry, Institute for Advanced Studies in Basic Sciences (IASBS),

Gava Zang, Zanjan 45137-66731, Iran

<sup>b</sup>School of Pharmacy, Tokyo University of Pharmacy and Life Sciences,

1432-1 Horinouchi, Hachioji, Tokyo 192-0392, Japan

E-mail: [kaboudin@gmail.com](mailto:kaboudin@gmail.com), Tel: +98 24 33153220, Fax: +98 24 33153232

**NMR Spectra for the compounds 2a-2t, 3a-3f, 5a-5c, 7a-7b and 8**

**5-60**

**Figure S1:  $^1\text{H}$  NMR Spectra of 2a**

**Figure S2:  $^{13}\text{C}$  NMR Spectra of 2a**

**Figure S3:  $^1\text{H}$  NMR Spectra of 2b**

**Figure S4:  $^{13}\text{C}$  NMR Spectra of 2b**

**Figure S5:  $^1\text{H}$  NMR Spectra of 2c**

**Figure S6:  $^{13}\text{C}$  NMR Spectra of 2c**

**Figure S7:  $^1\text{H}$  NMR Spectra of 2d**

**Figure S8:  $^{13}\text{C}$  NMR Spectra of 2d**

**Figure S9:  $^1\text{H}$  NMR Spectra of 2e**

**Figure S10:  $^{13}\text{C}$  NMR Spectra of 2e**

**Figure S11:  $^1\text{H}$  NMR Spectra of 2f**

**Figure S12:  $^{13}\text{C}$  NMR Spectra of 2f**

**Figure S13:  $^1\text{H}$  NMR Spectra of 2g**

**Figure S14:  $^{13}\text{C}$  NMR Spectra of 2g**

**Figure S15:  $^1\text{H}$  NMR Spectra of 2h**

**Figure S16:  $^{13}\text{C}$  NMR Spectra of 2h**

**Figure S17:  $^1\text{H}$  NMR Spectra of 2i**

**Figure S18:  $^{13}\text{C}$  NMR Spectra of 2i**

**Figure S19:  $^1\text{H}$  NMR Spectra of 2j**

**Figure S20:**  $^{13}\text{C}$  NMR Spectra of 2j  
**Figure S21:**  $^1\text{H}$  NMR Spectra of 2n  
**Figure S22:**  $^{13}\text{C}$  NMR Spectra of 2n  
**Figure S23:**  $^1\text{H}$  NMR Spectra of 2p  
**Figure S24:**  $^{13}\text{C}$  NMR Spectra of 2p  
**Figure S25:**  $^1\text{H}$  NMR Spectra of 2q  
**Figure S26:**  $^{13}\text{C}$  NMR Spectra of 2q  
**Figure S27:**  $^1\text{H}$  NMR Spectra of 2r  
**Figure S28:**  $^{13}\text{C}$  NMR Spectra of 2r  
**Figure S29:**  $^1\text{H}$  NMR Spectra of 2s  
**Figure S30:**  $^{13}\text{C}$  NMR Spectra of 2s  
**Figure S31:**  $^1\text{H}$  NMR Spectra of 2t  
**Figure S32:**  $^{13}\text{C}$  NMR Spectra of 2t  
**Figure S33:**  $^1\text{H}$  NMR Spectra of 3a  
**Figure S34:**  $^{13}\text{C}$  NMR Spectra of 3a  
**Figure S35:**  $^1\text{H}$  NMR Spectra of 3b  
**Figure S36:**  $^{13}\text{C}$  NMR Spectra of 3b  
**Figure S37:**  $^1\text{H}$  NMR Spectra of 3c  
**Figure S38:**  $^{13}\text{C}$  NMR Spectra of 3c  
**Figure S39:**  $^1\text{H}$  NMR Spectra of 3d  
**Figure S40:**  $^{13}\text{C}$  NMR Spectra of 3d  
**Figure S41:**  $^1\text{H}$  NMR Spectra of 3e

**Figure S42:  $^{13}\text{C}$  NMR Spectra of 3e**

**Figure S43:  $^1\text{H}$  NMR Spectra of 3f**

**Figure S44:  $^{13}\text{C}$  NMR Spectra of 3f**

**Figure S45:  $^1\text{H}$  NMR Spectra of 5a**

**Figure S46:  $^{13}\text{C}$  NMR Spectra of 5a**

**Figure S47:  $^1\text{H}$  NMR Spectra of 5b**

**Figure S48:  $^{13}\text{C}$  NMR Spectra of 5b**

**Figure S49:  $^1\text{H}$  NMR Spectra of 5c**

**Figure S50:  $^{13}\text{C}$  NMR Spectra of 5c**

**Figure S51:  $^1\text{H}$  NMR Spectra of 7a**

**Figure S52:  $^{13}\text{C}$  NMR Spectra of 7a**

**Figure S53:  $^1\text{H}$  NMR Spectra of 7b**

**Figure S54:  $^{13}\text{C}$  NMR Spectra of 7b**

**Figure S55:  $^1\text{H}$  NMR Spectra of 8**

**Figure S56:  $^{13}\text{C}$  NMR Spectra of 8**

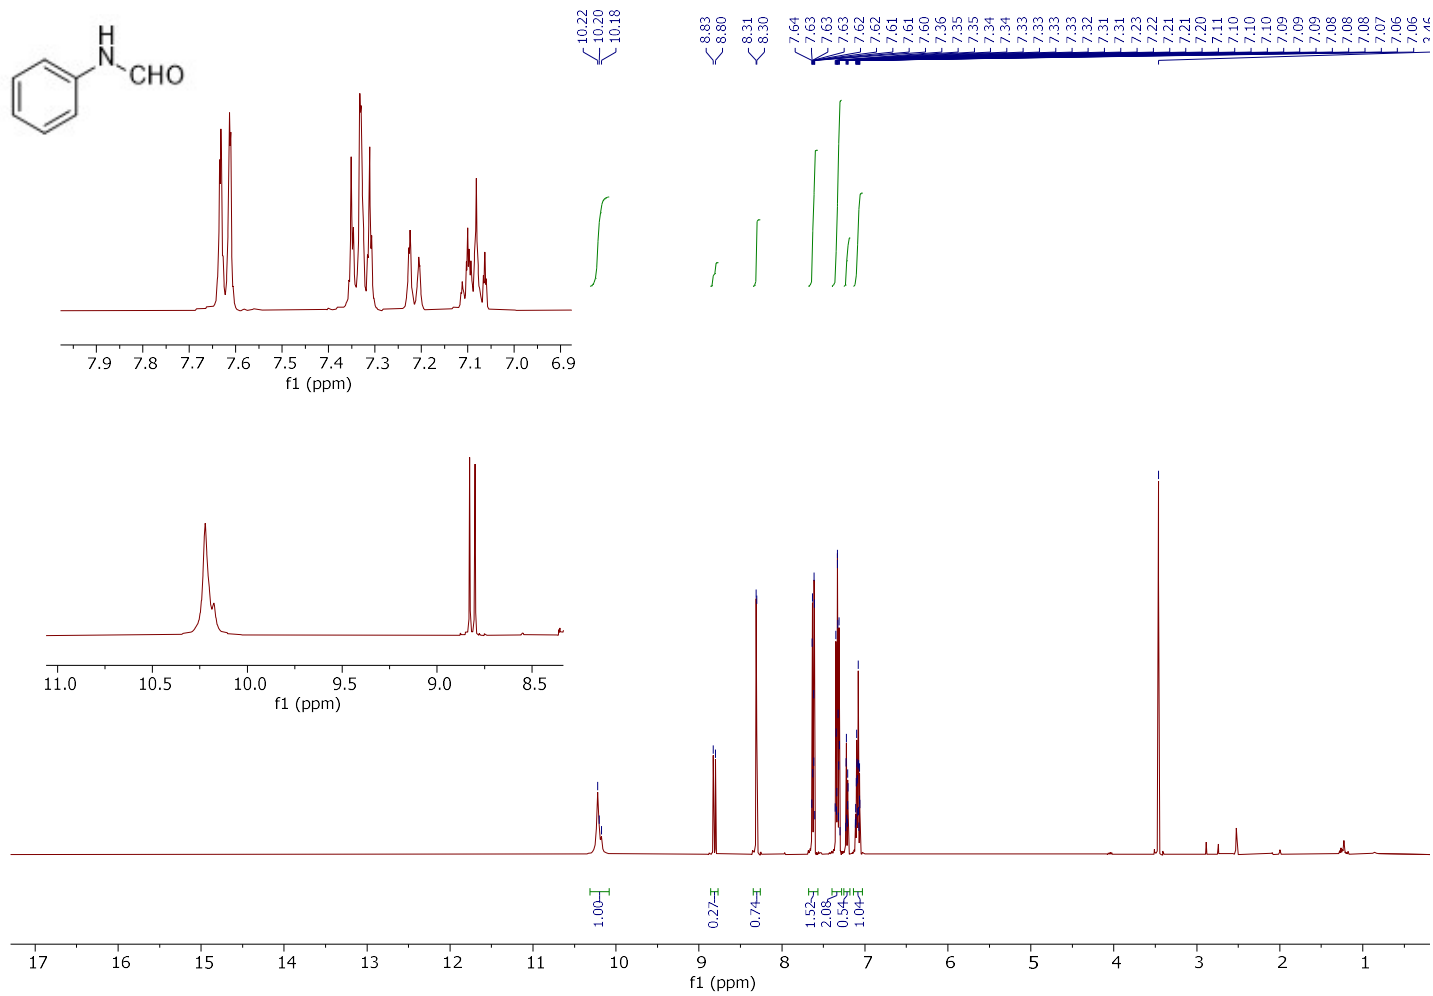

Figure S1: <sup>1</sup>H NMR Spectra of 2a

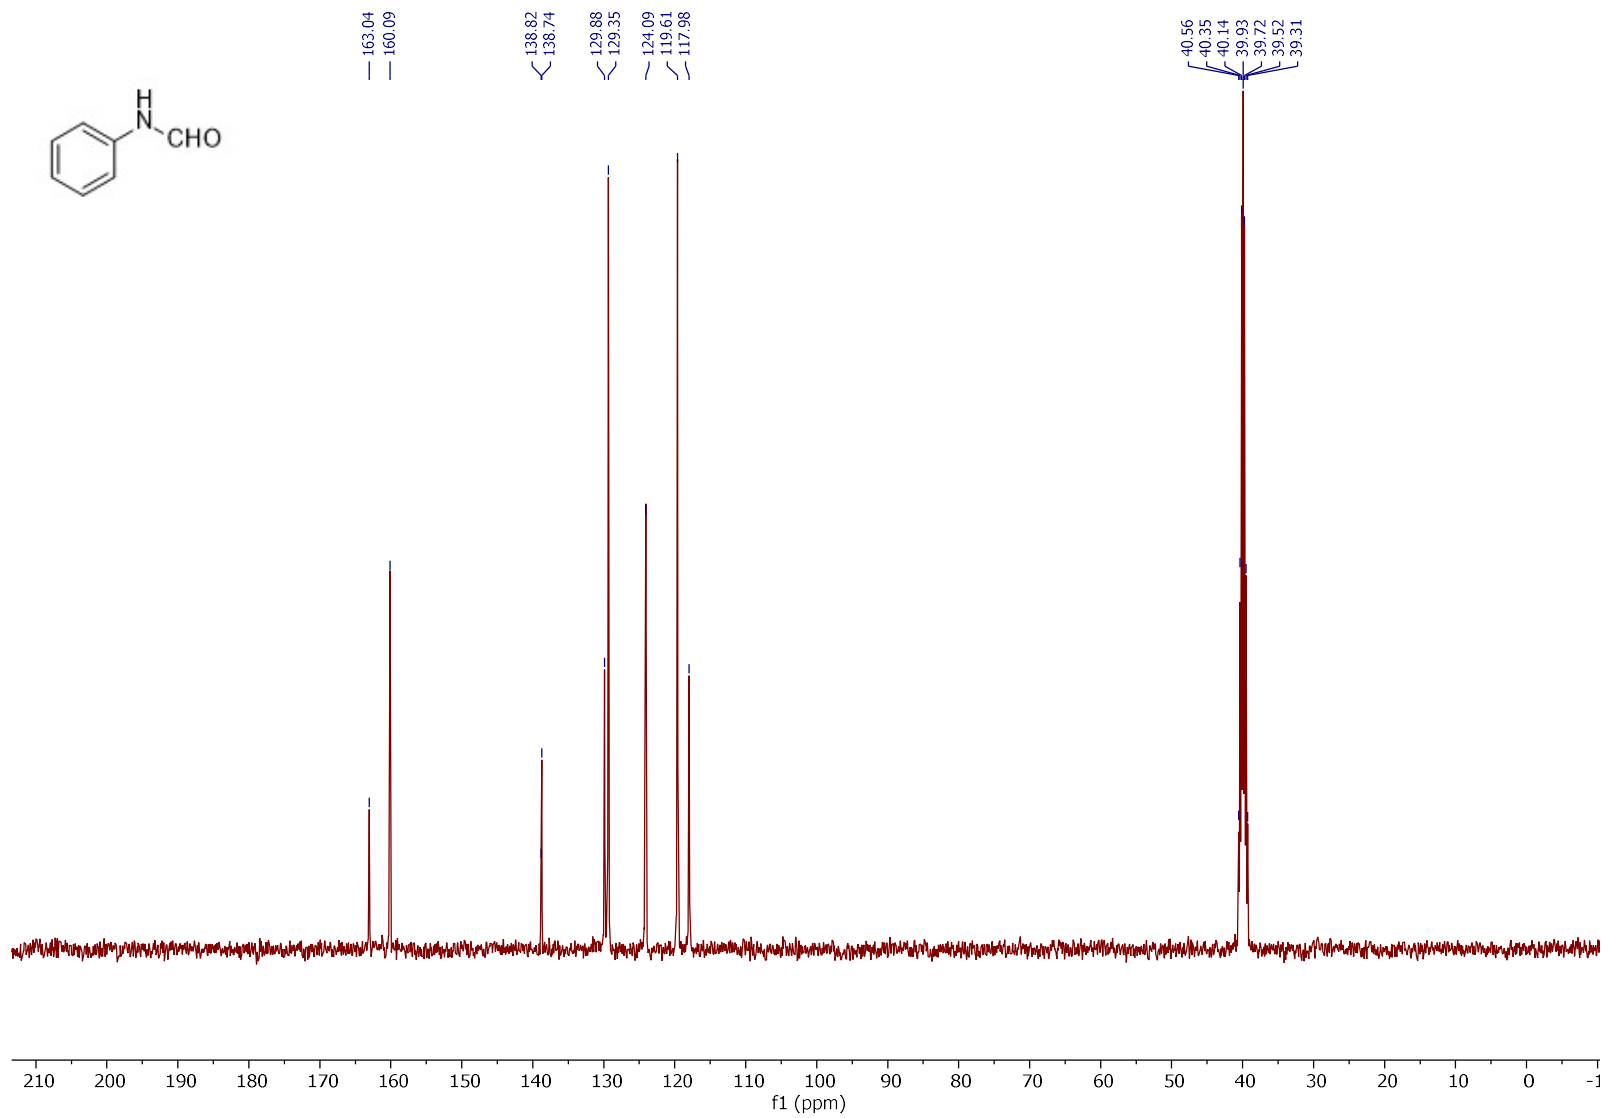

Figure S2:  $^{13}\text{C}$  NMR Spectra of 2a

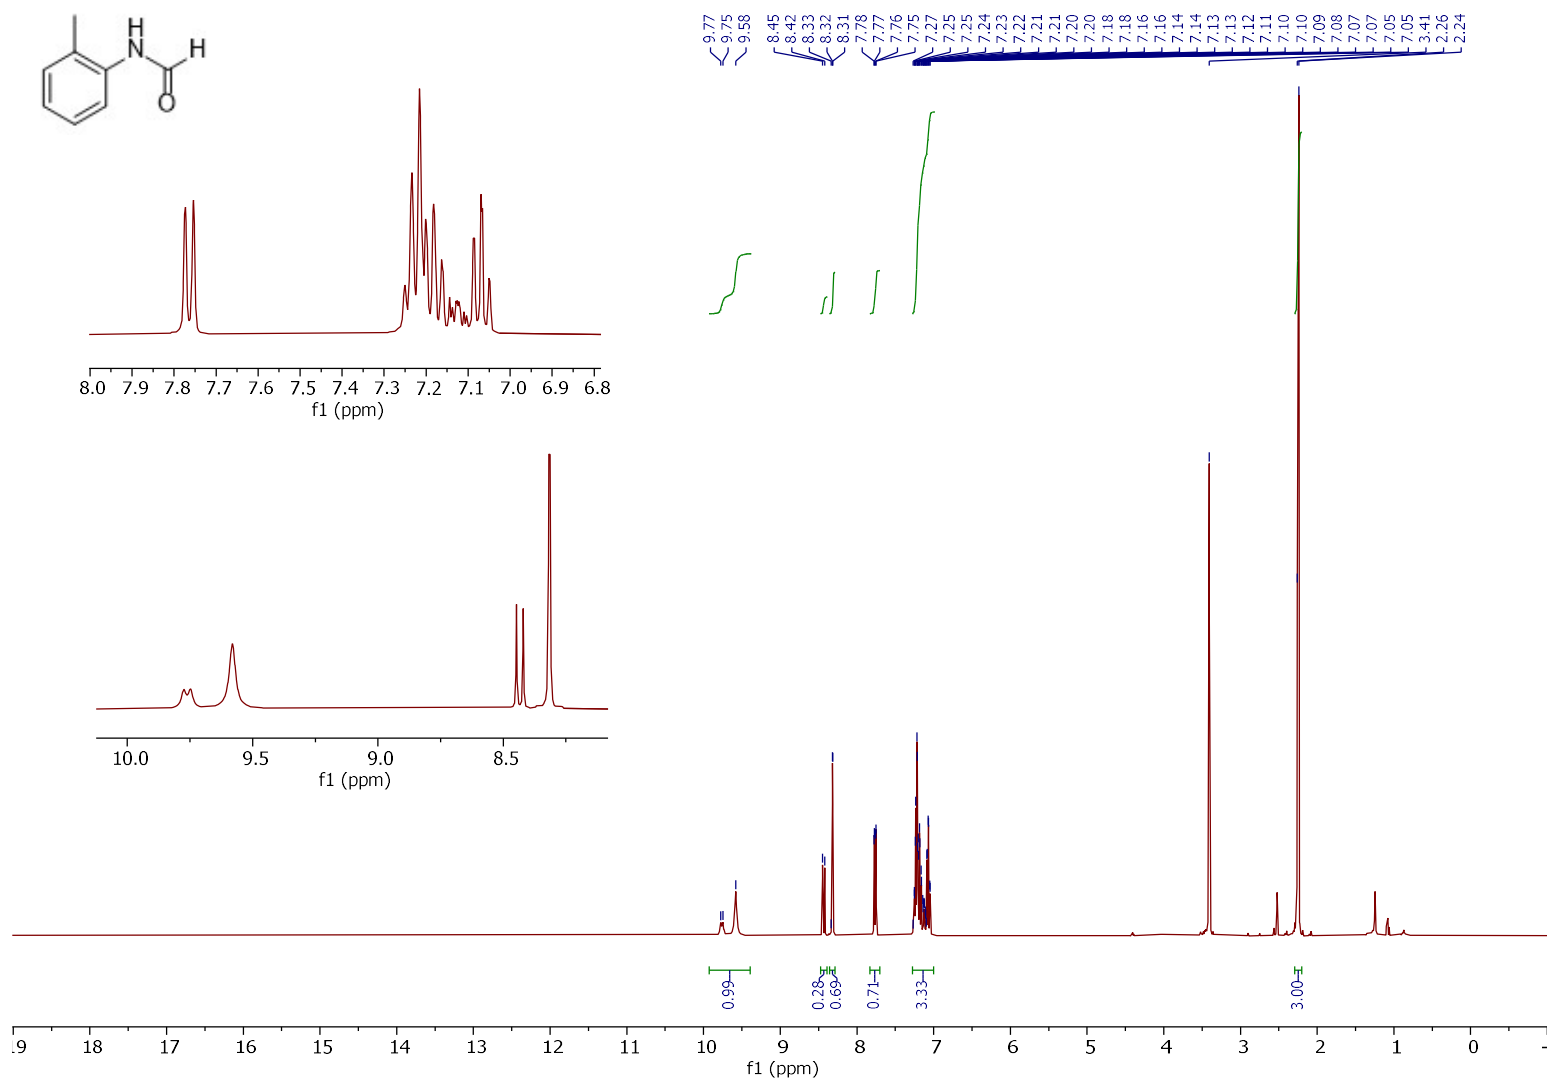

Figure S3:  $^1\text{H}$  NMR Spectra of 2b

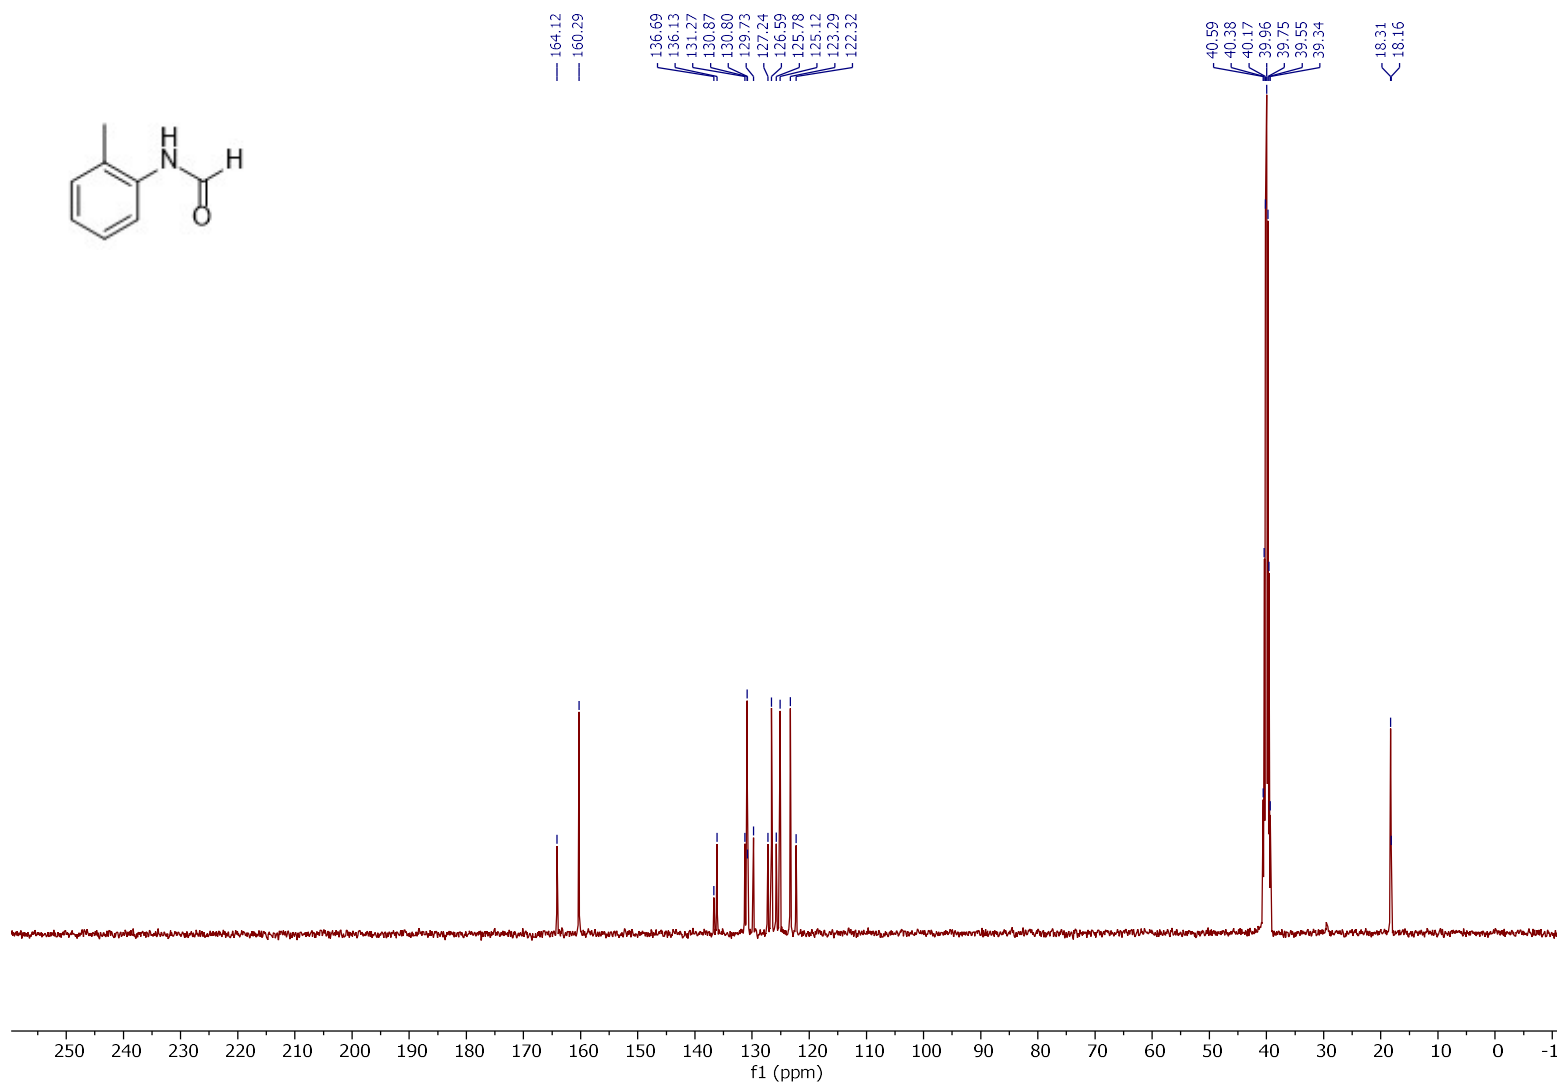

Figure S4:  $^{13}\text{C}$  NMR Spectra of 2b



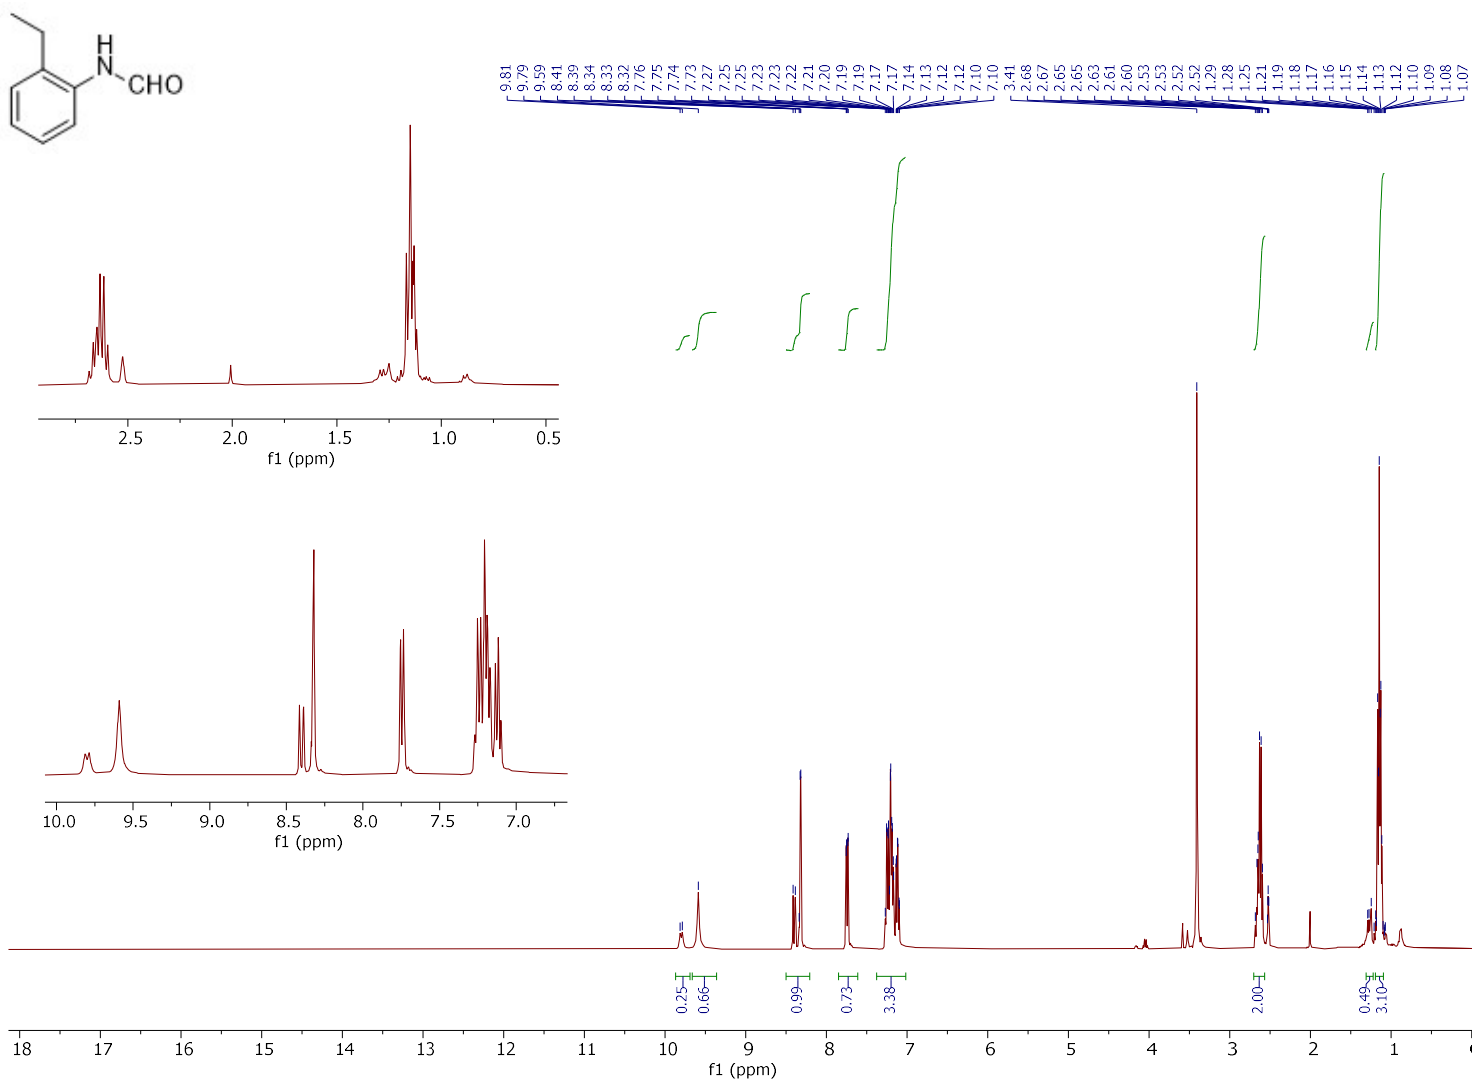

Figure S5:  $^1\text{H}$  NMR Spectra of 2c

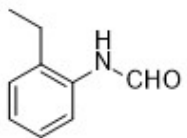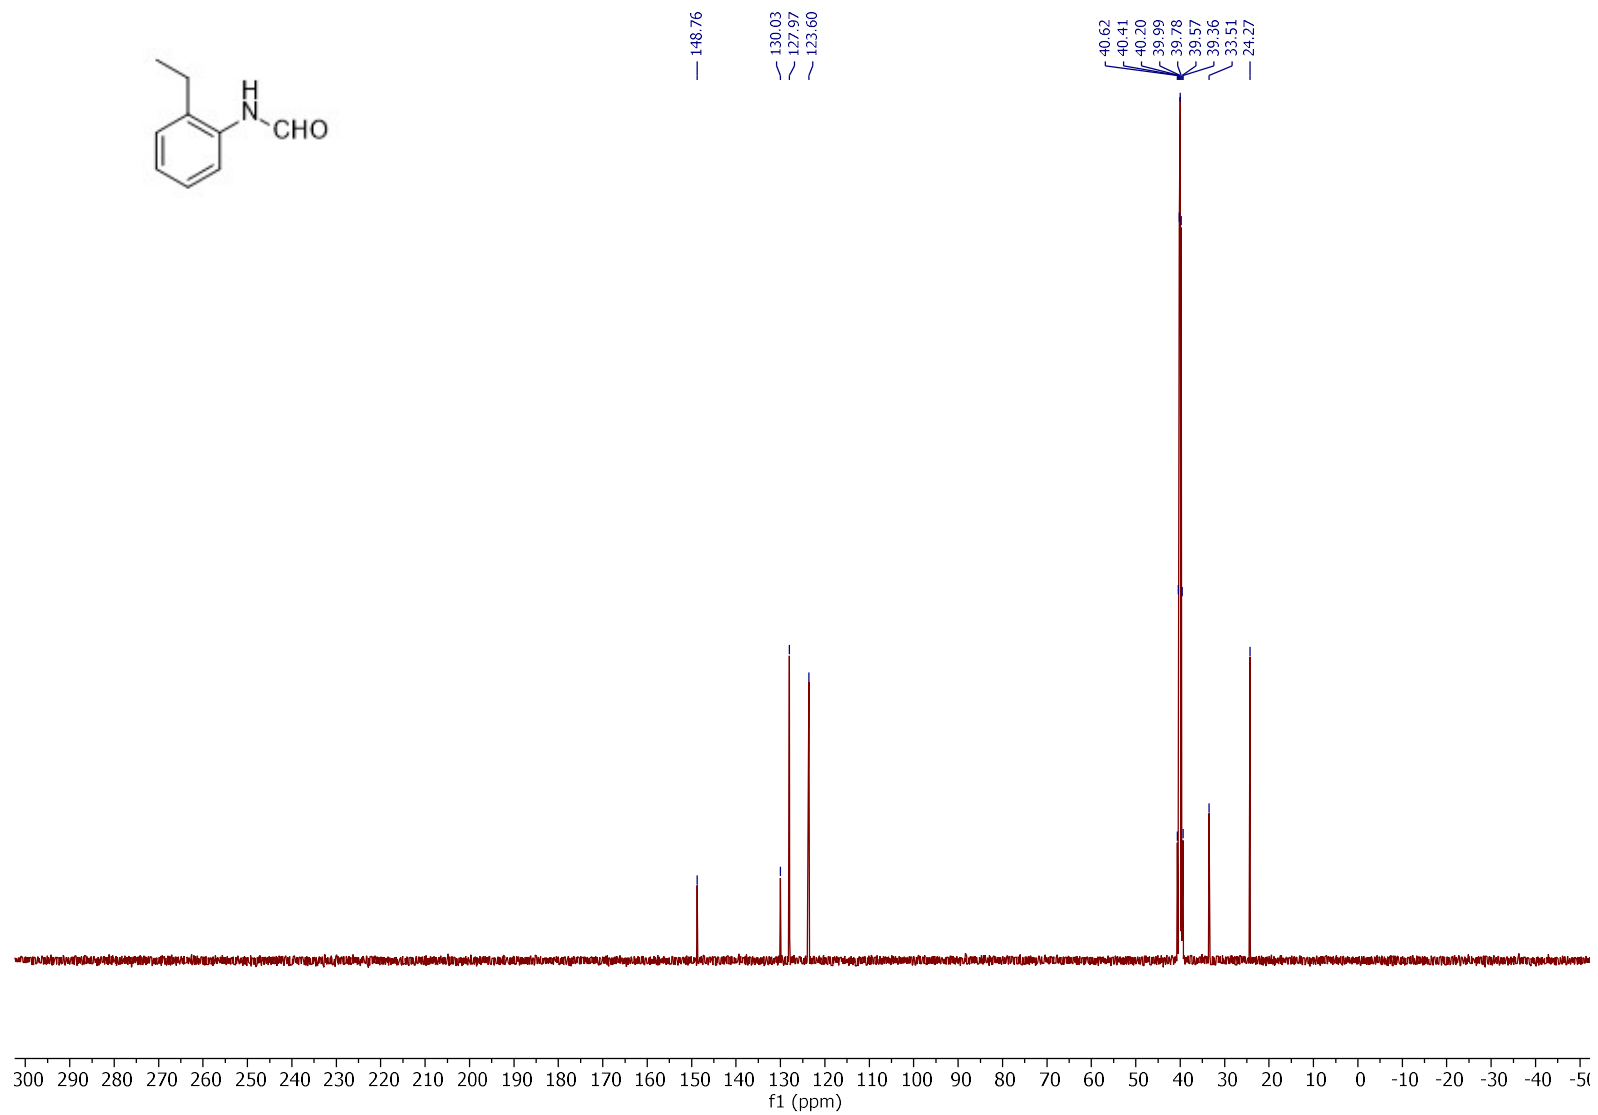

Figure S6:  $^{13}\text{C}$  NMR Spectra of 2c

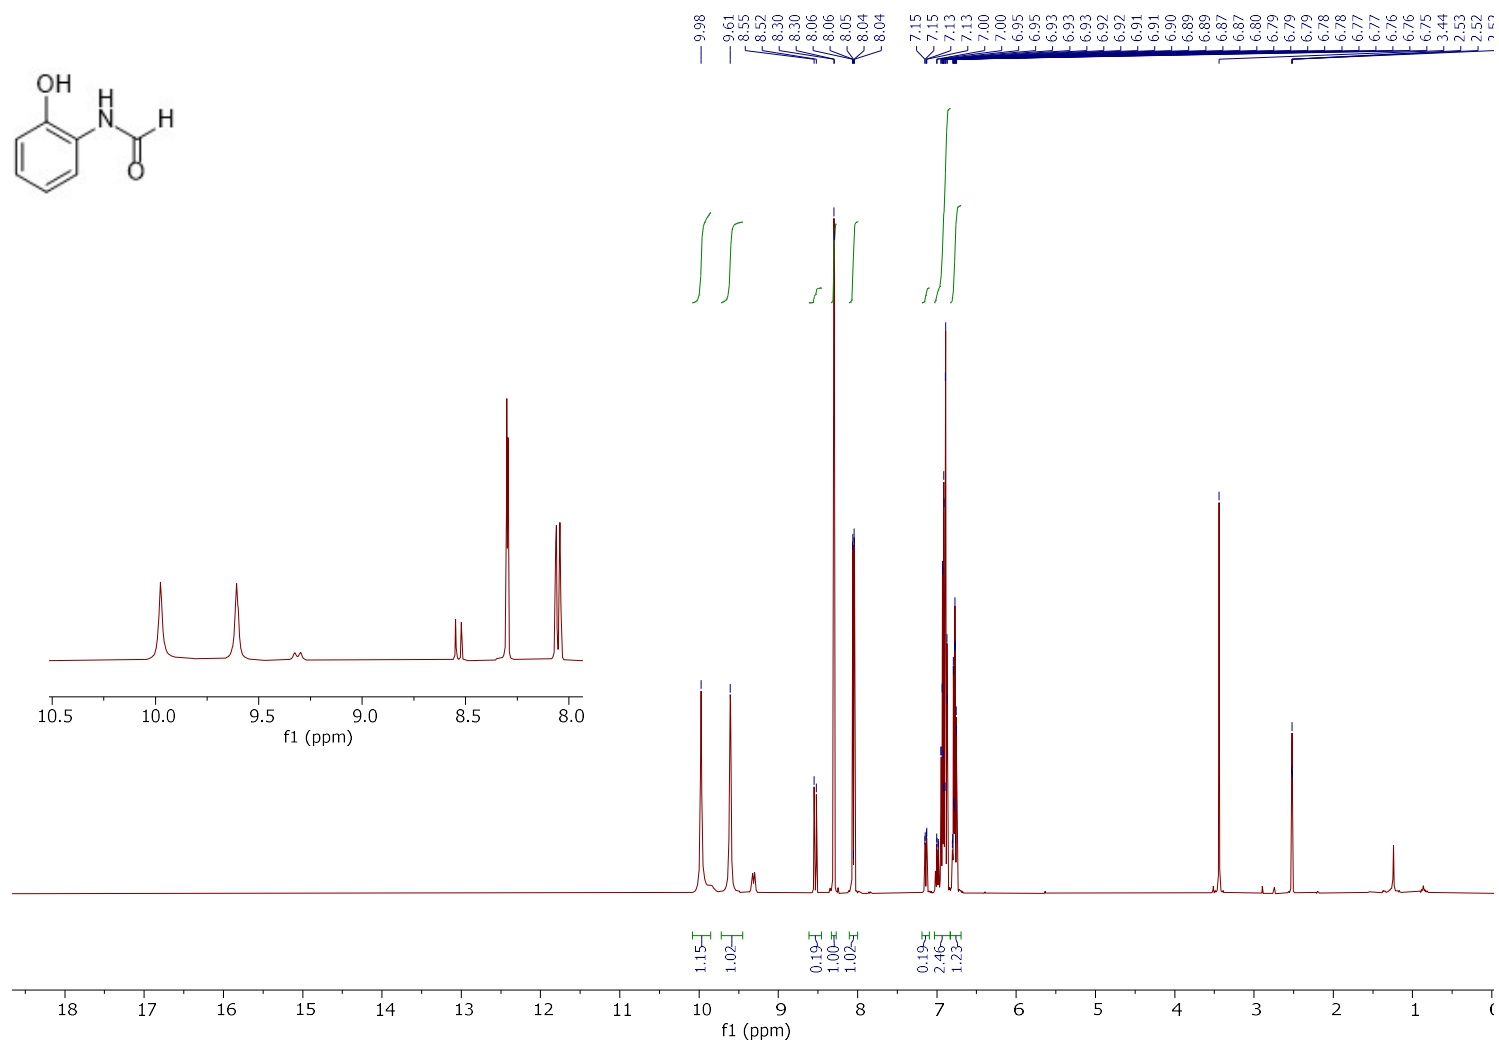

Figure S7: <sup>1</sup>H NMR Spectra of 2d

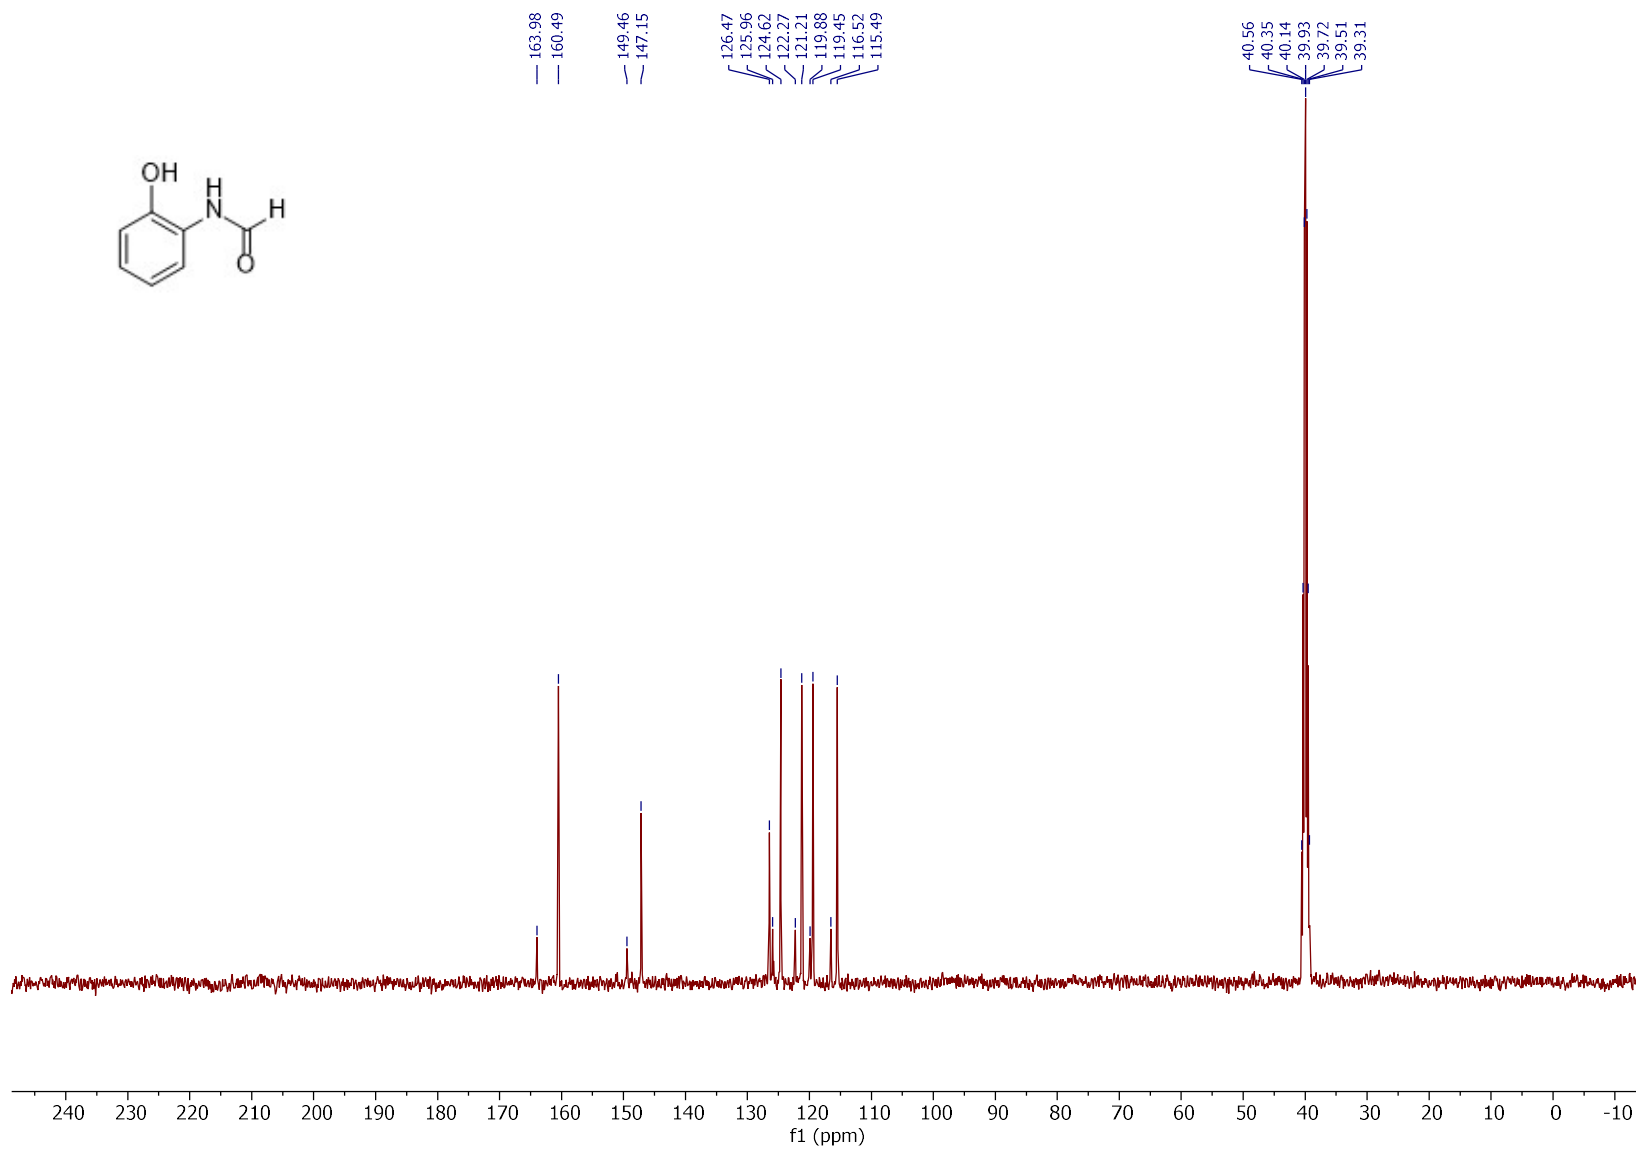

Figure S8: <sup>13</sup>C NMR Spectra of 2d

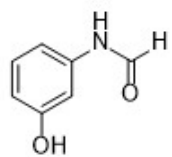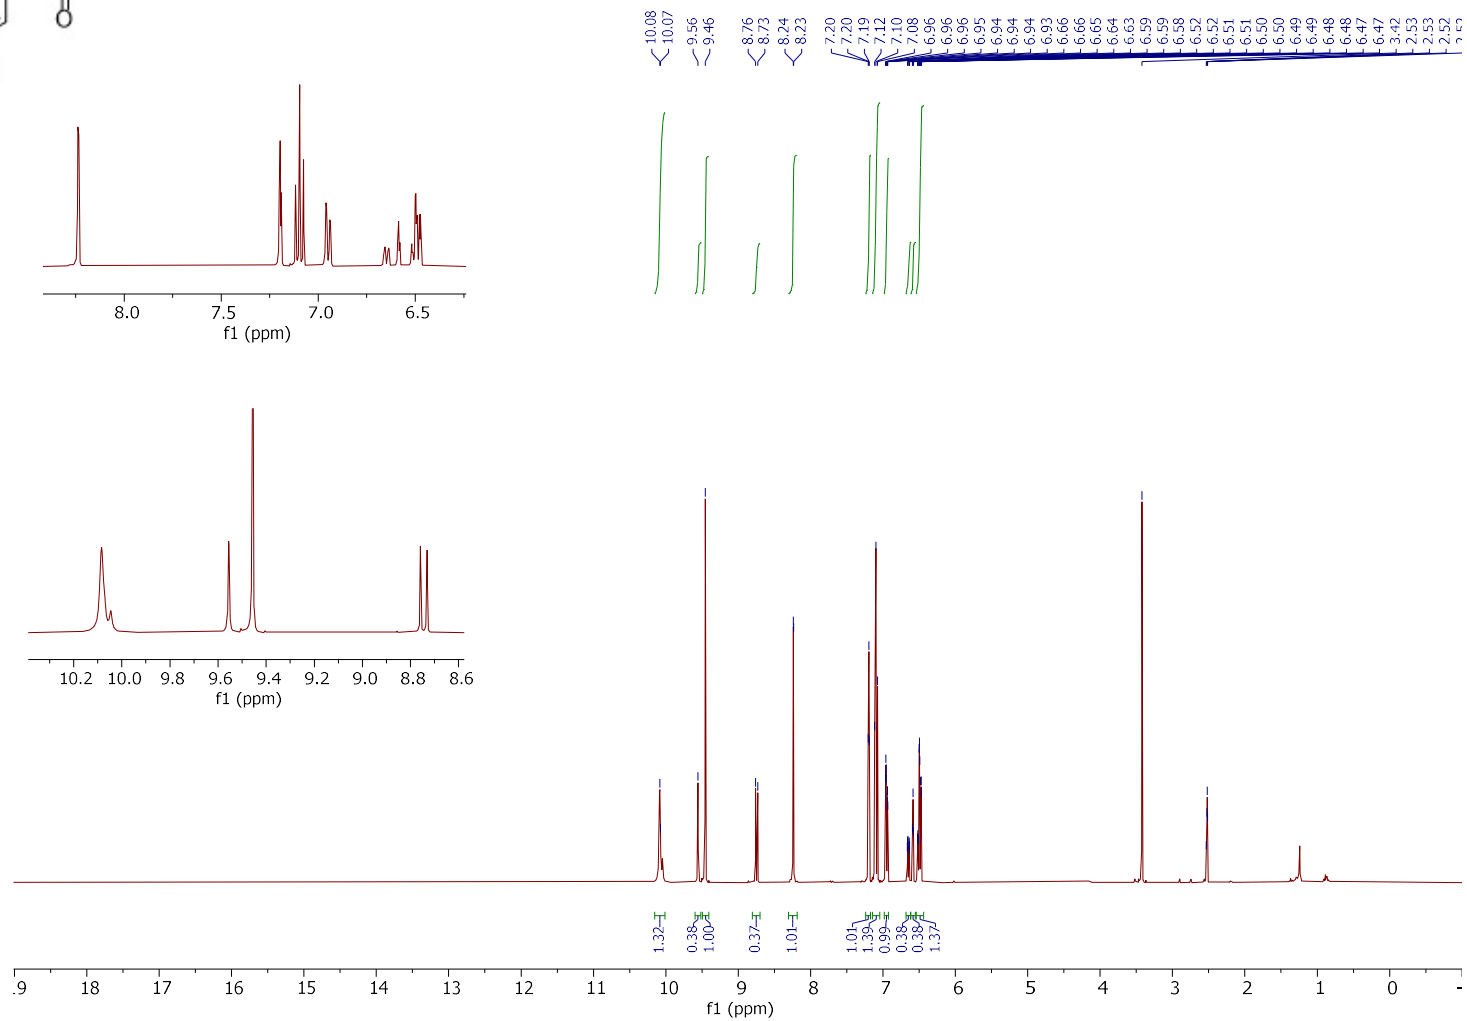

Figure S9: <sup>1</sup>H NMR Spectra of 2e

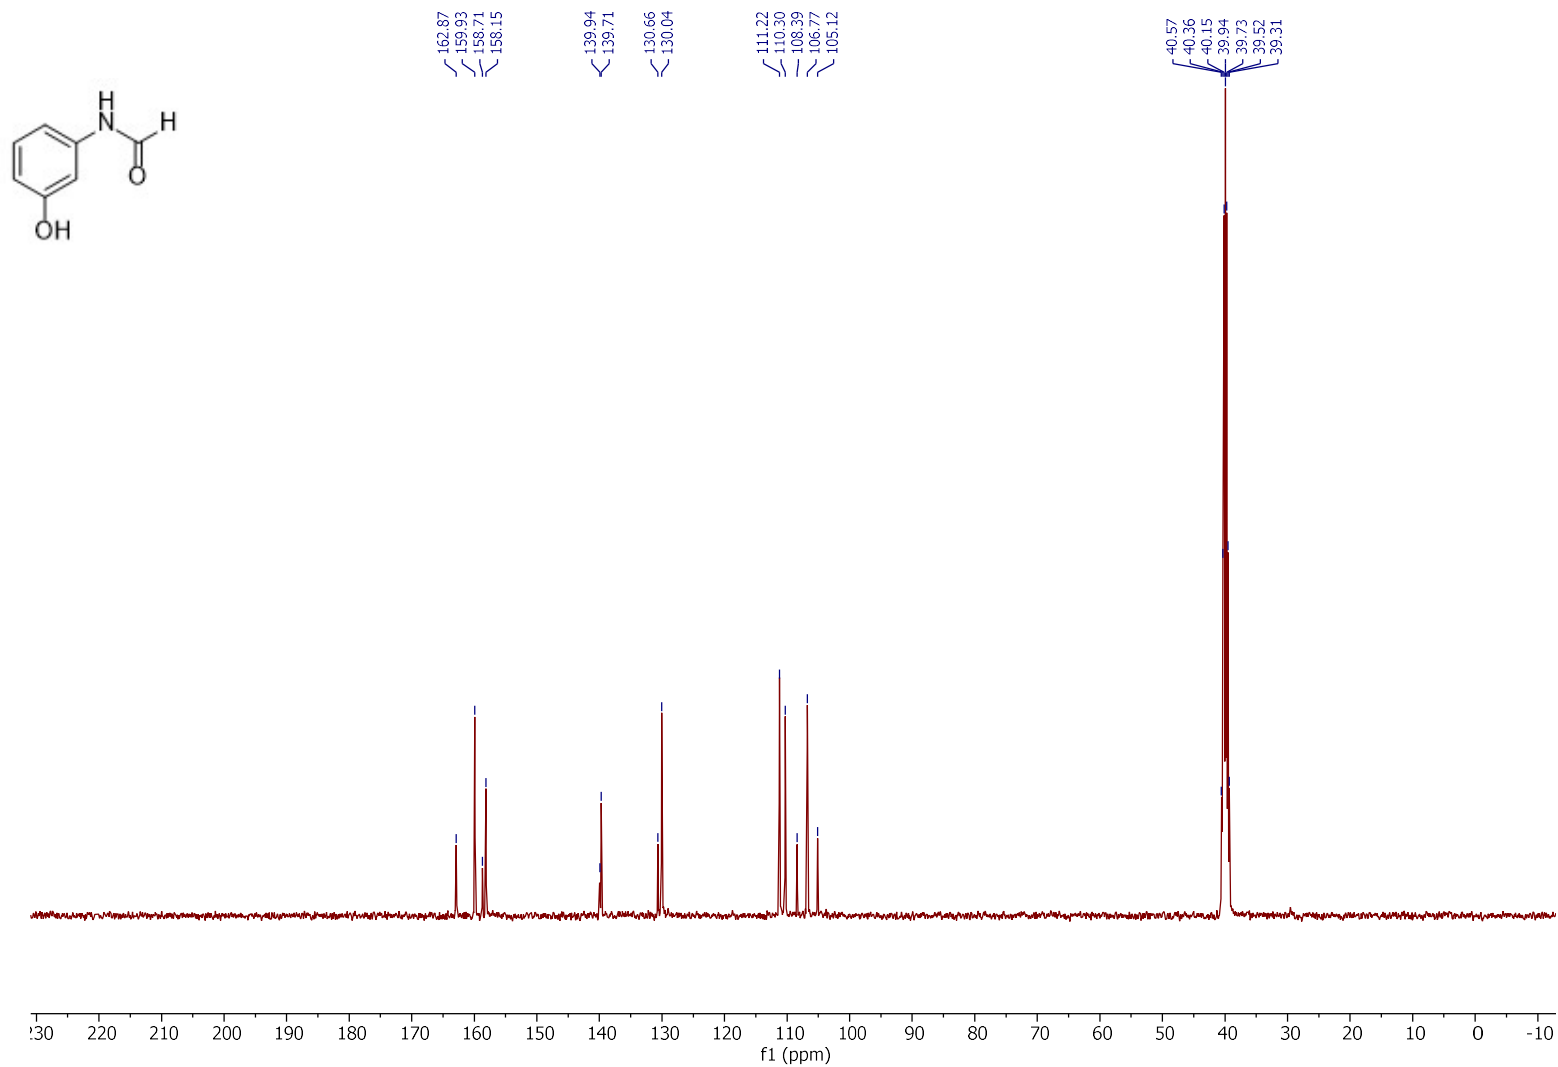

Figure S10: <sup>13</sup>C NMR Spectra of 2e

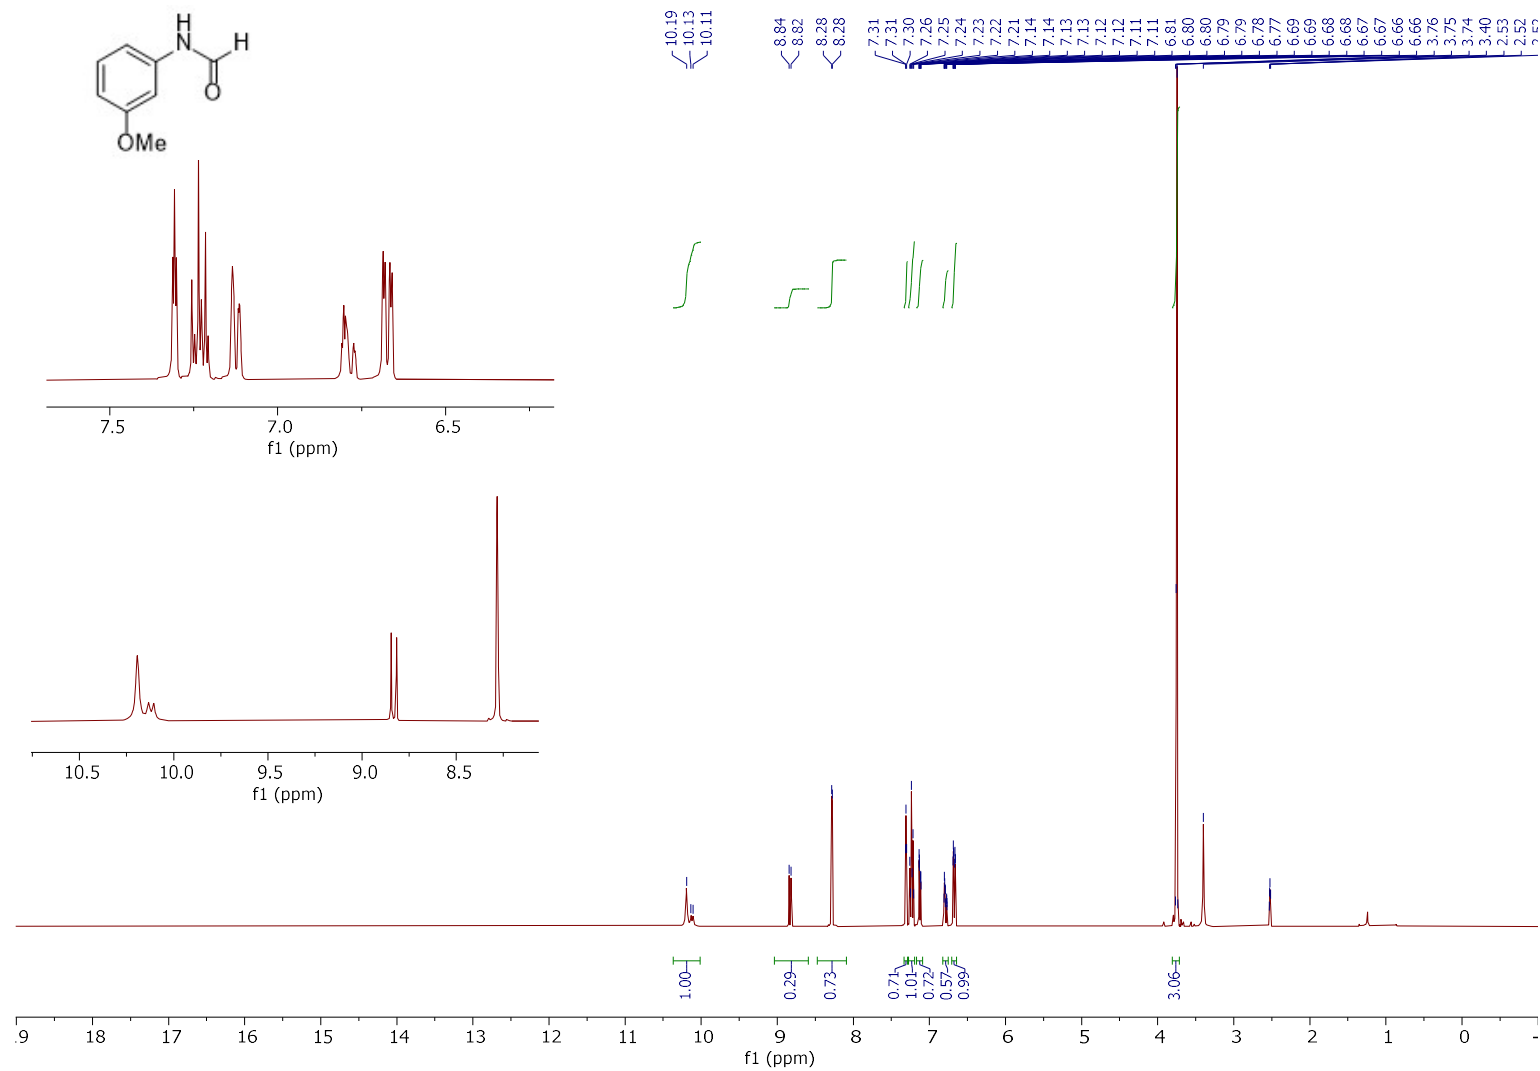

Figure S11: <sup>1</sup>H NMR Spectra of 2f

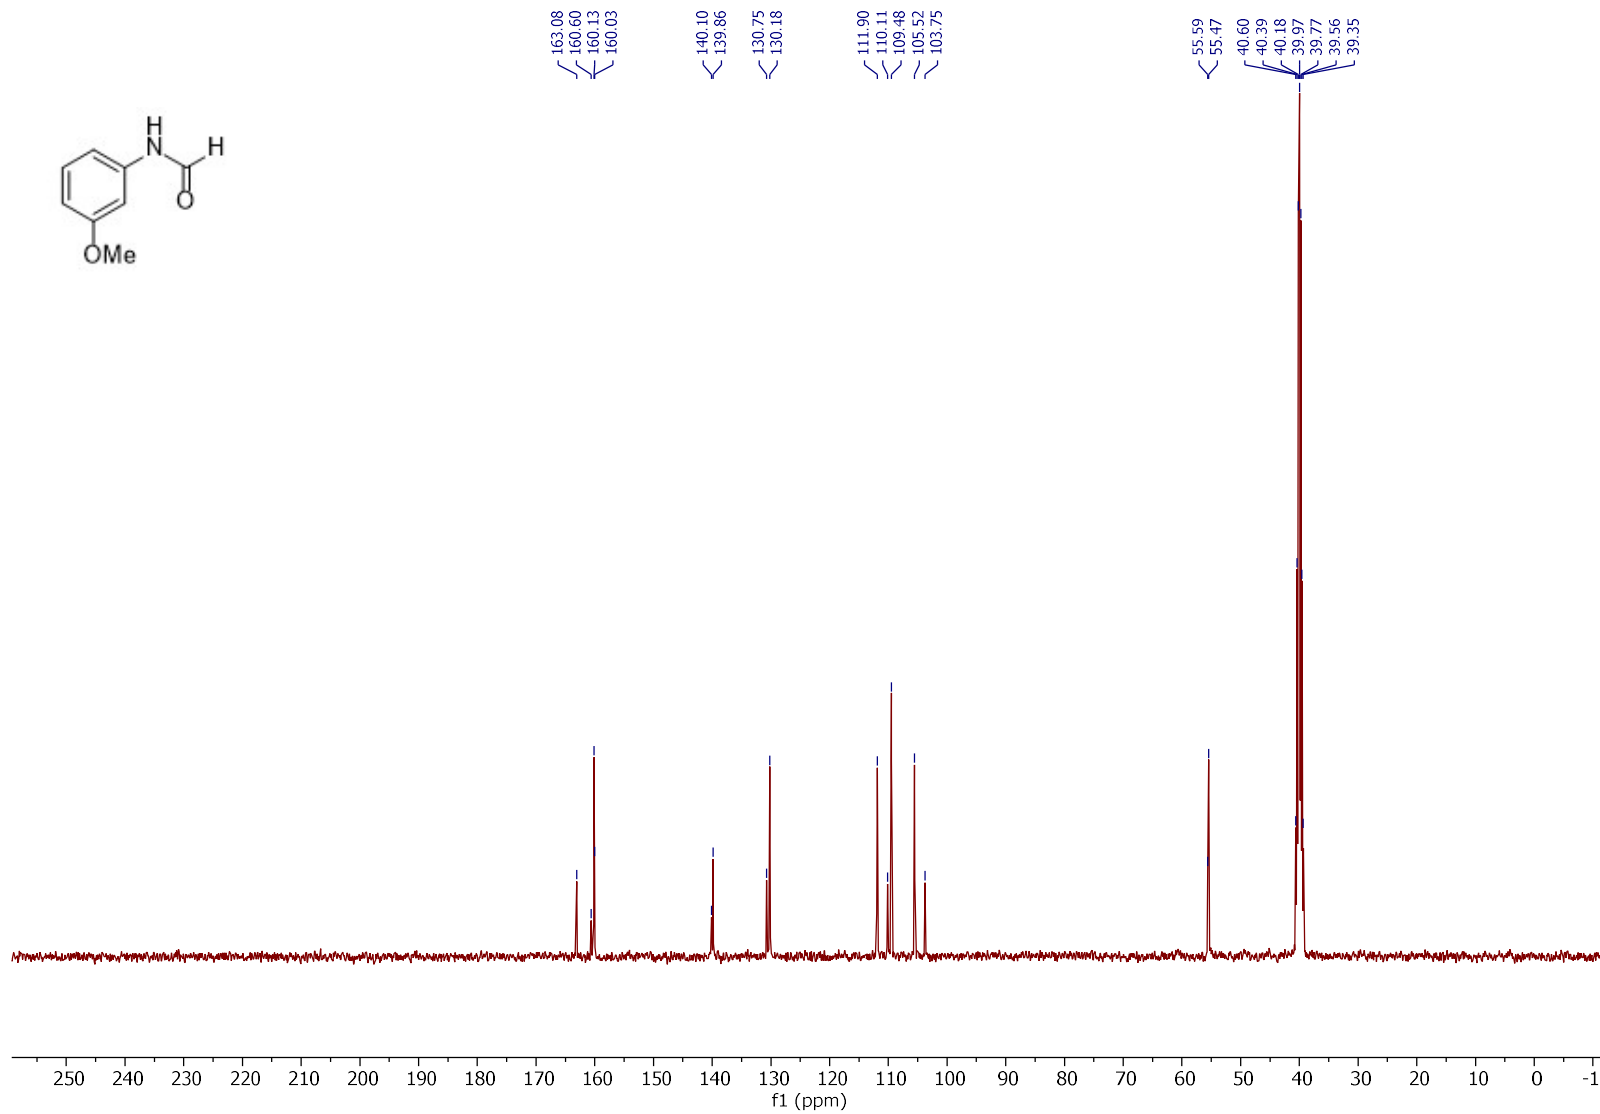

Figure S12: <sup>13</sup>C NMR Spectra of 2f



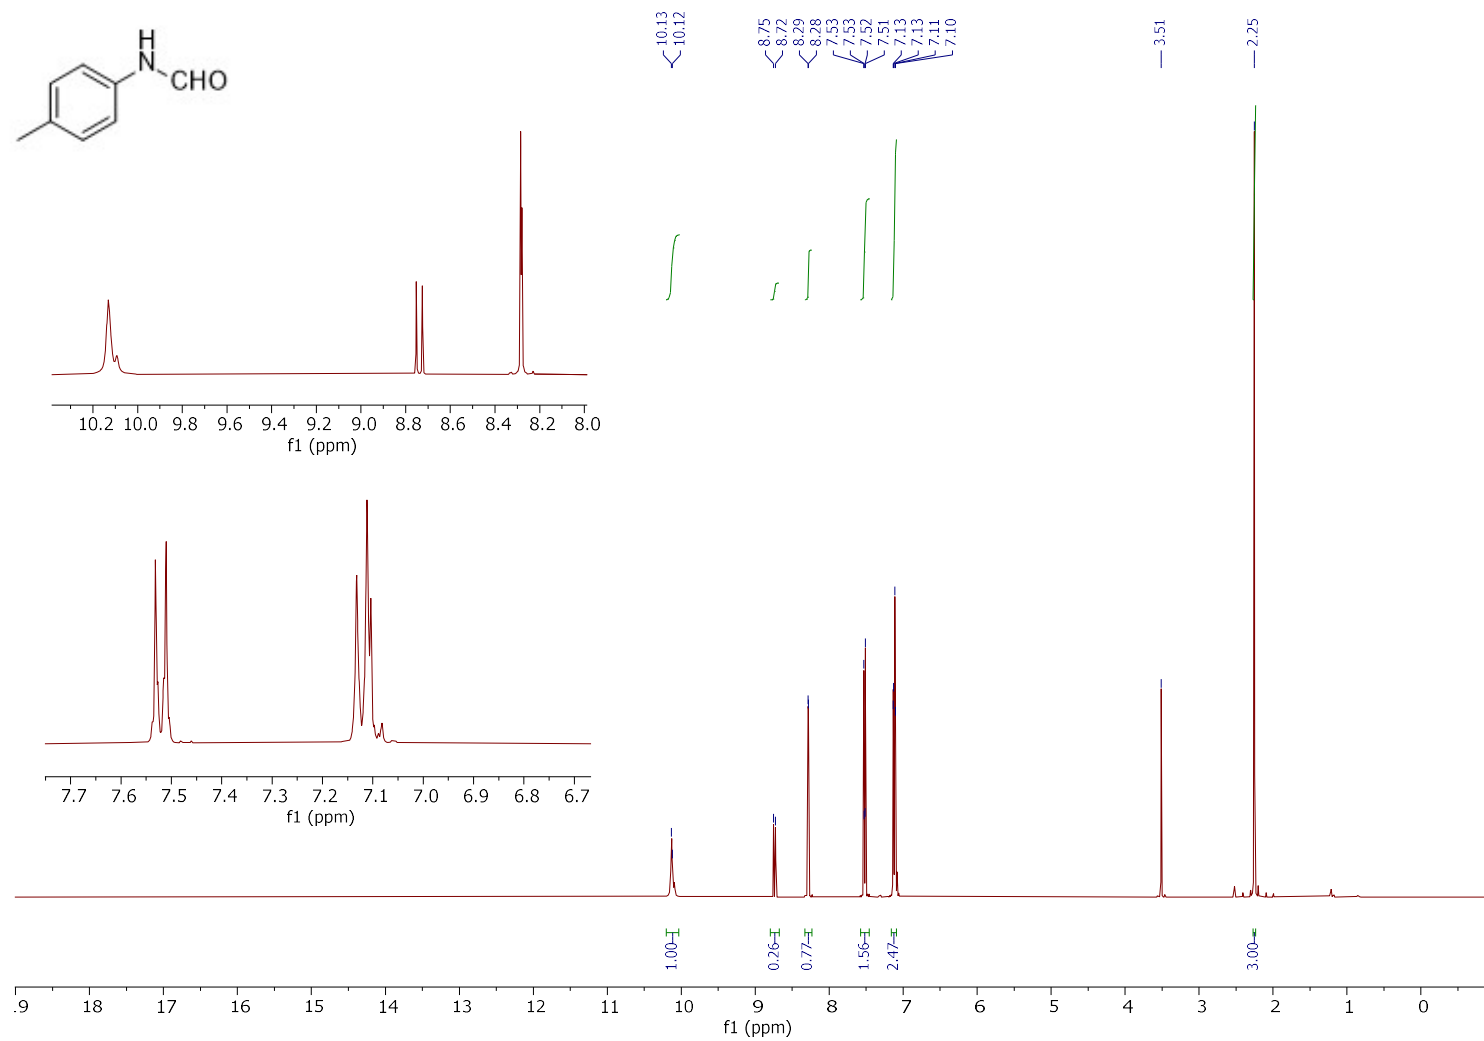

Figure S13: <sup>1</sup>H NMR Spectra of 2g

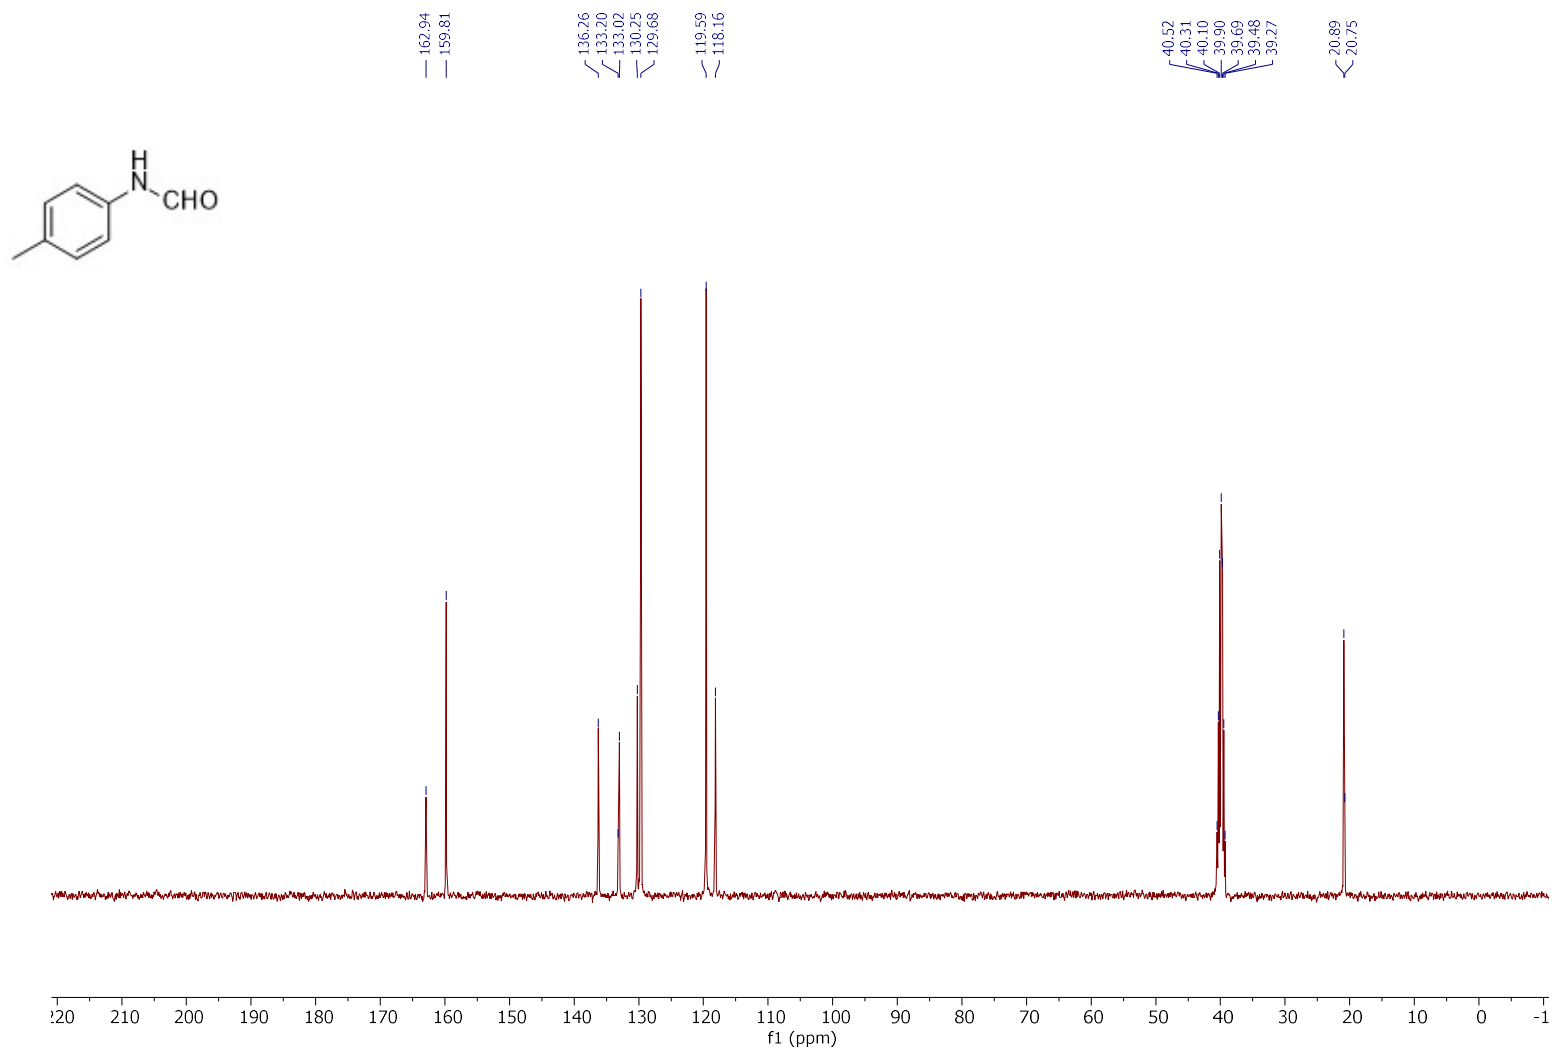

Figure S14: <sup>13</sup>C NMR Spectra of 2g

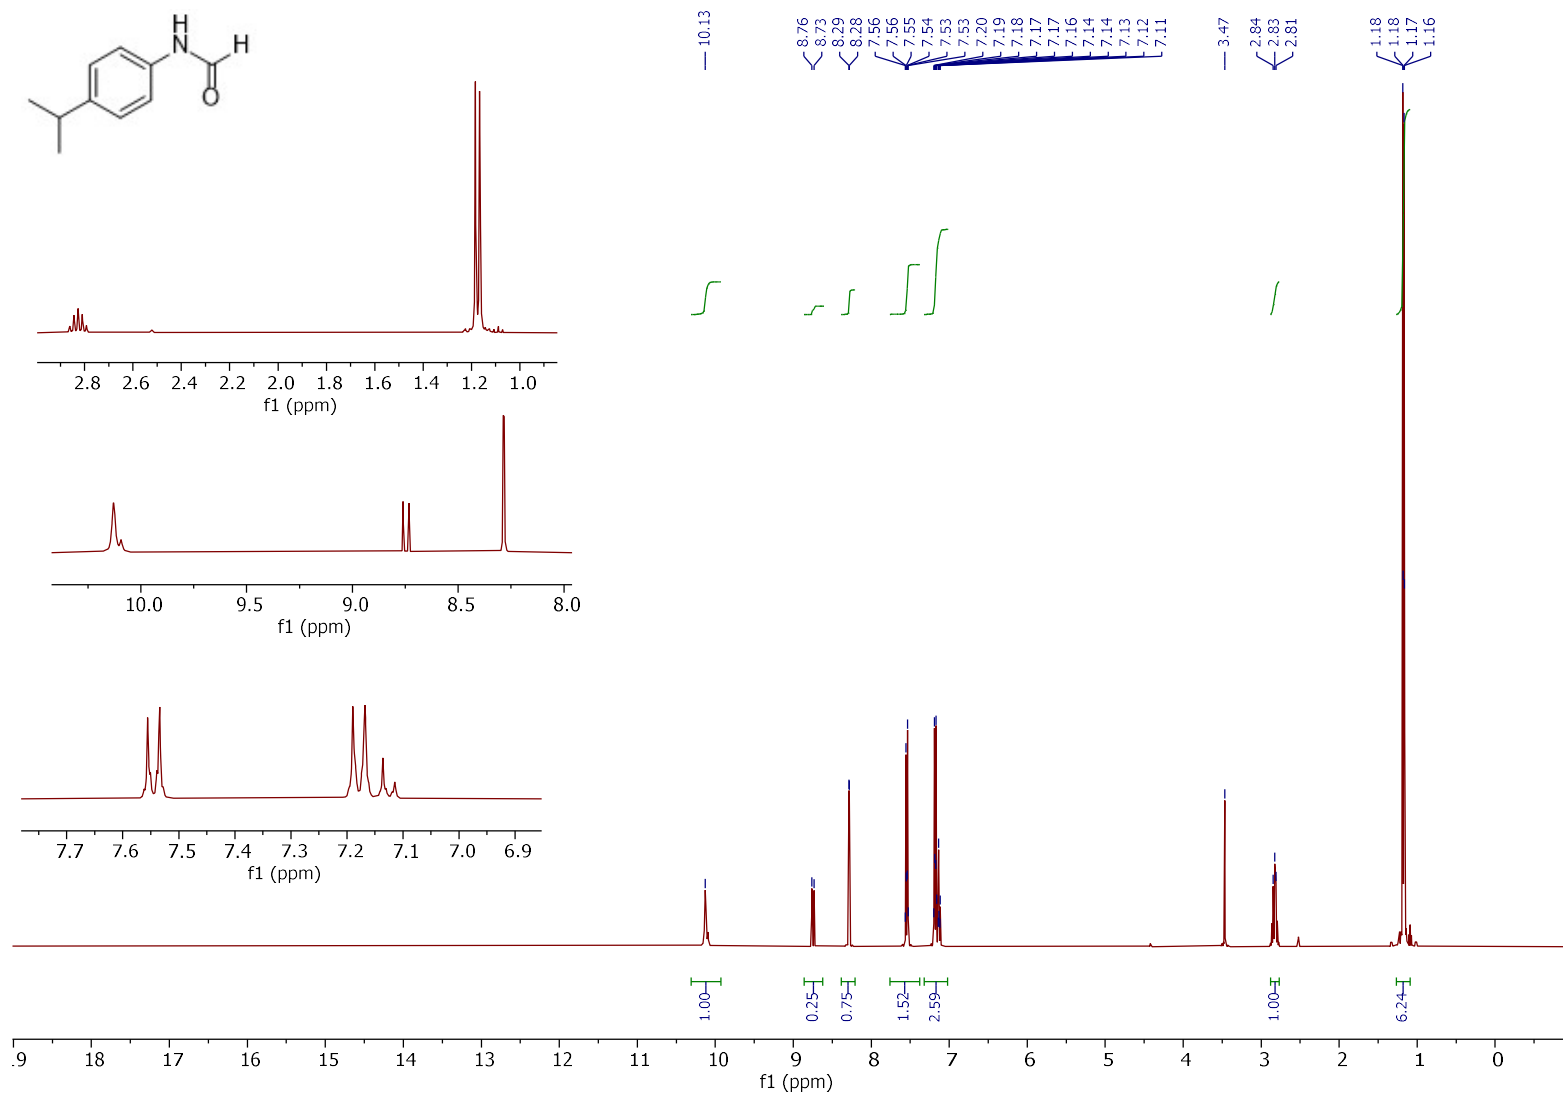

Figure S15:  $^1\text{H}$  NMR Spectra of 2h

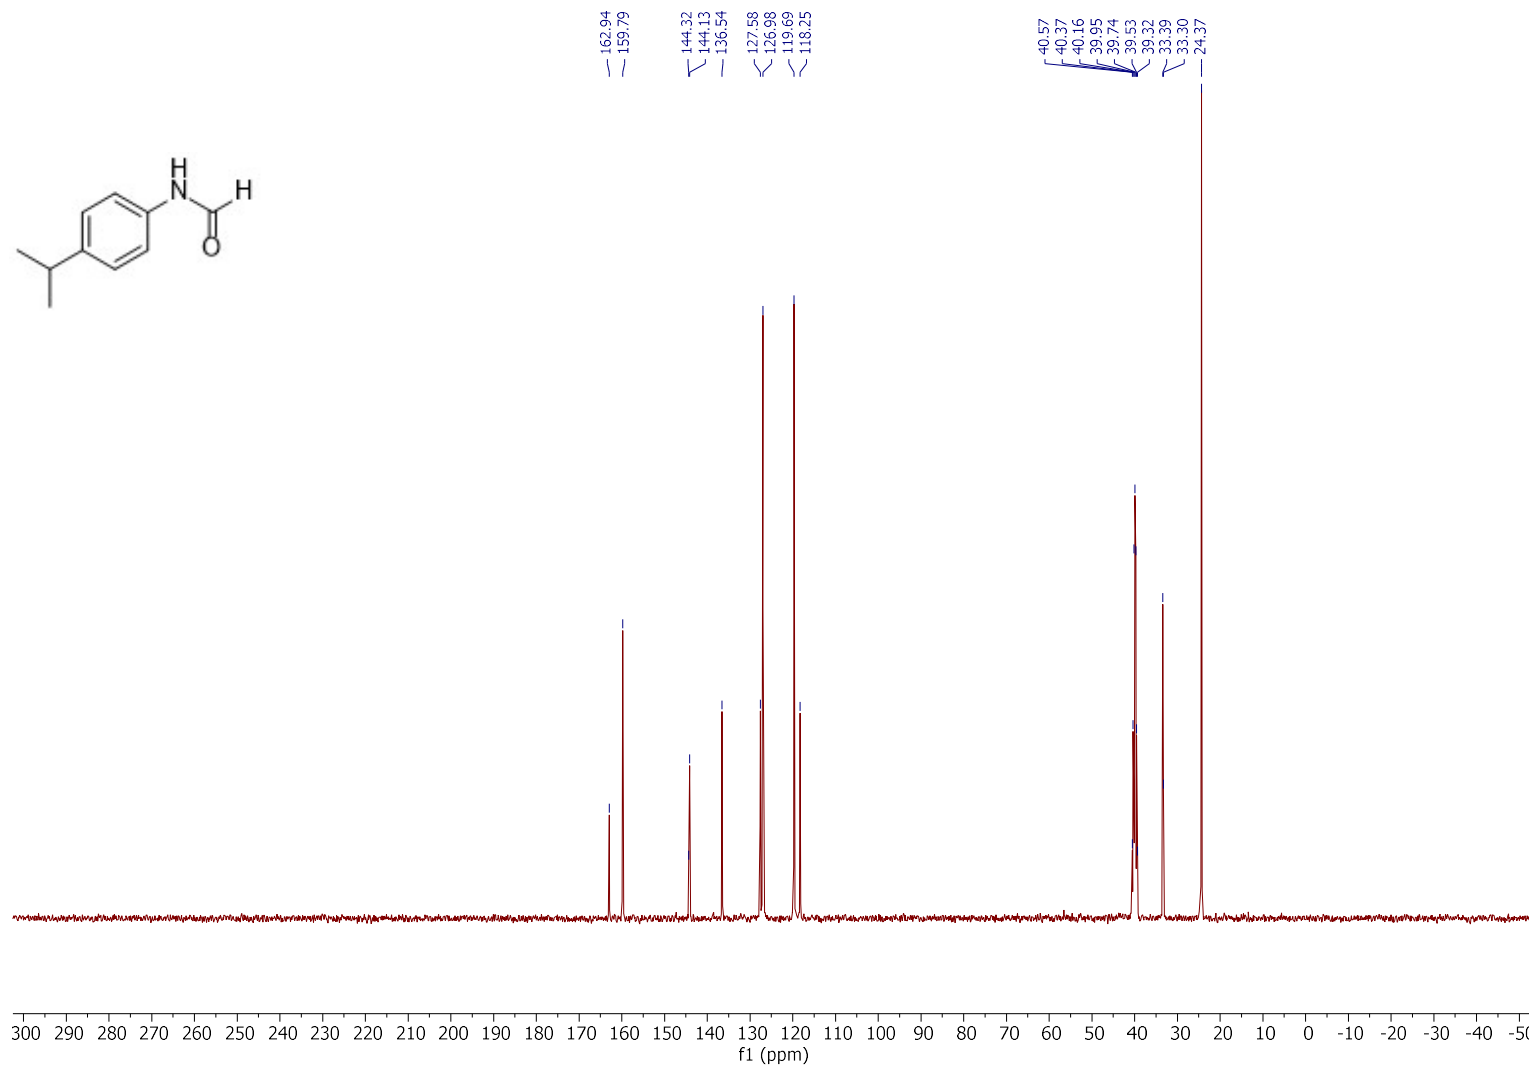

Figure S16: <sup>13</sup>C NMR Spectra of 2h

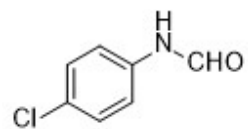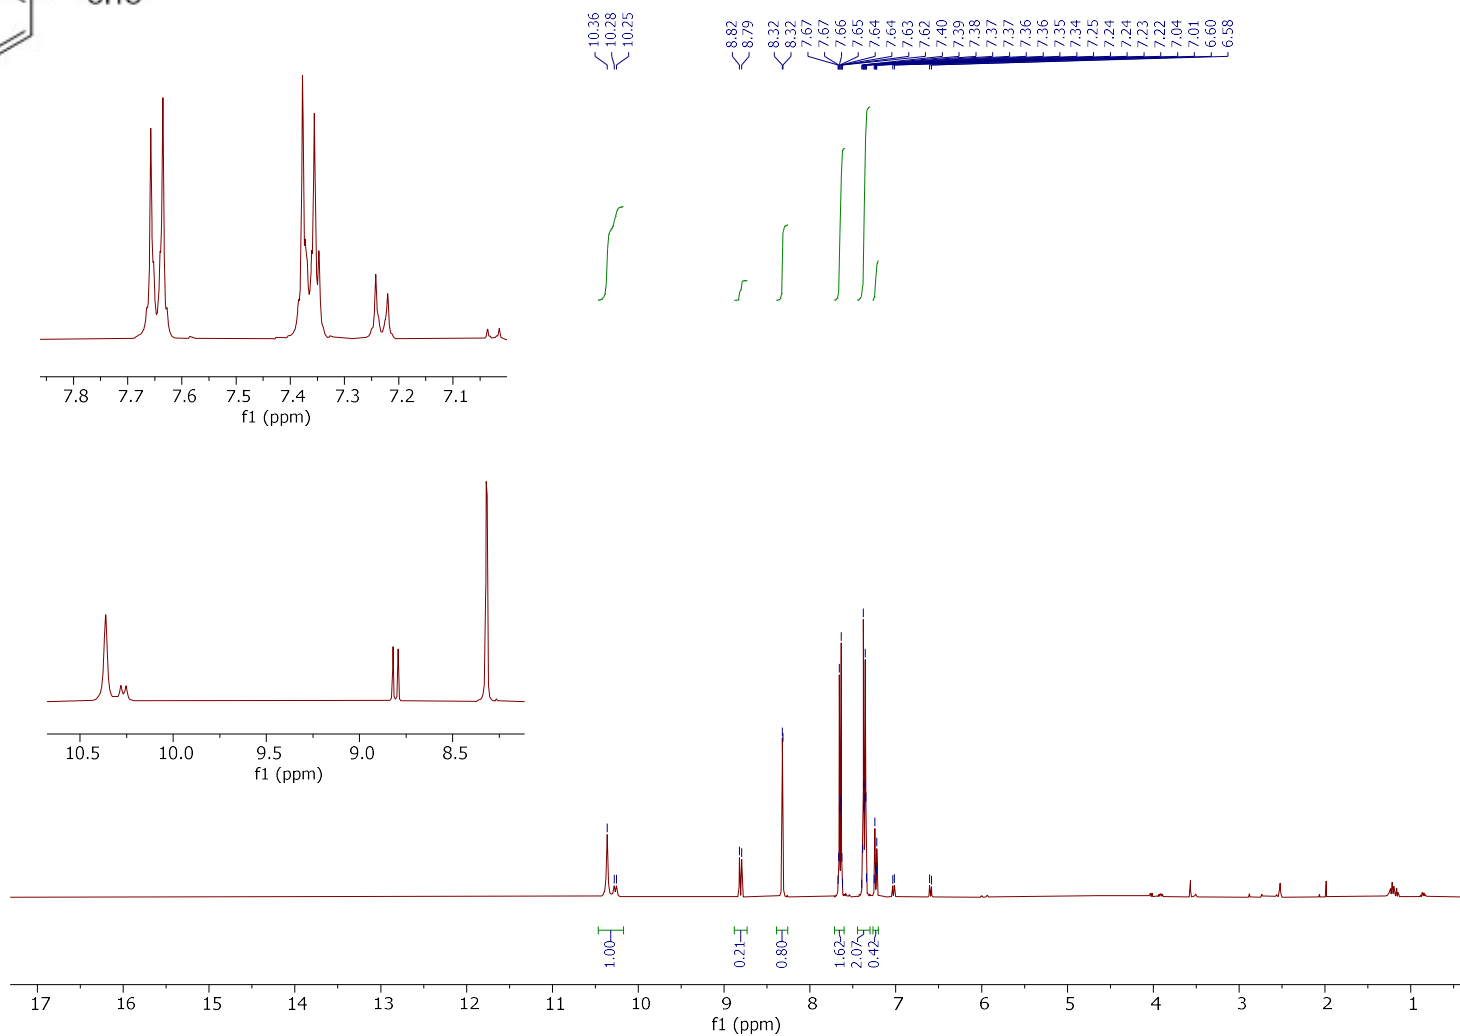

Figure S17: <sup>1</sup>H NMR Spectra of 2i

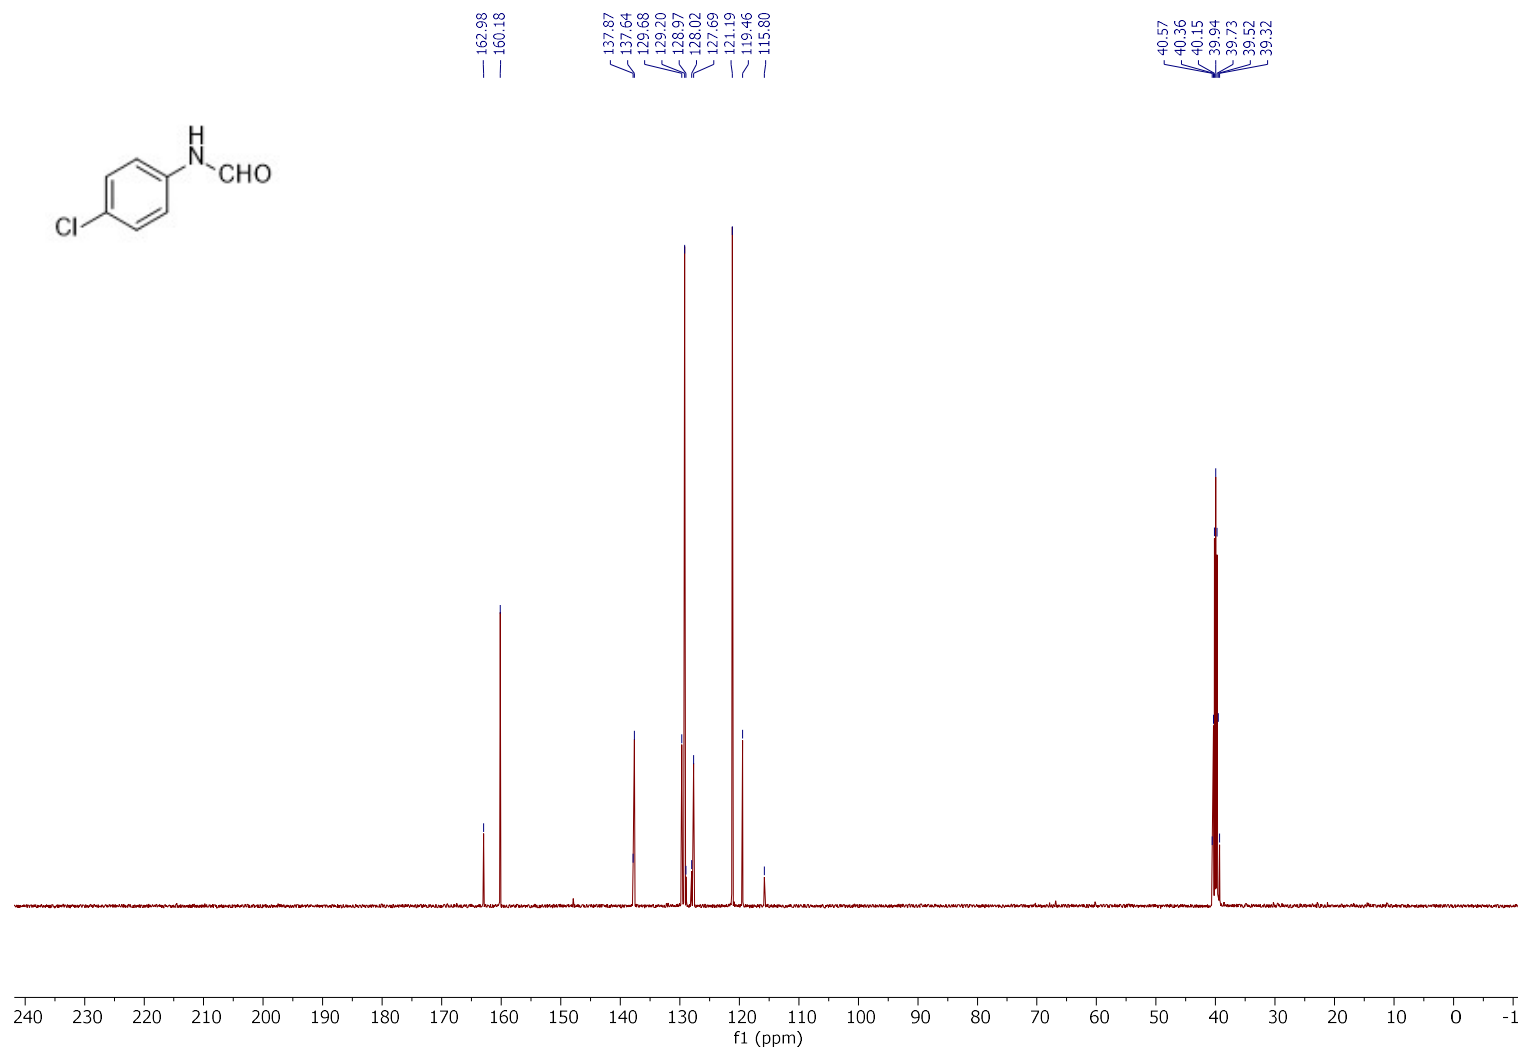

Figure S18:  $^{13}\text{C}$  NMR Spectra of 2i

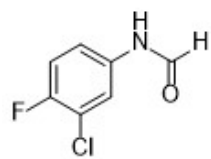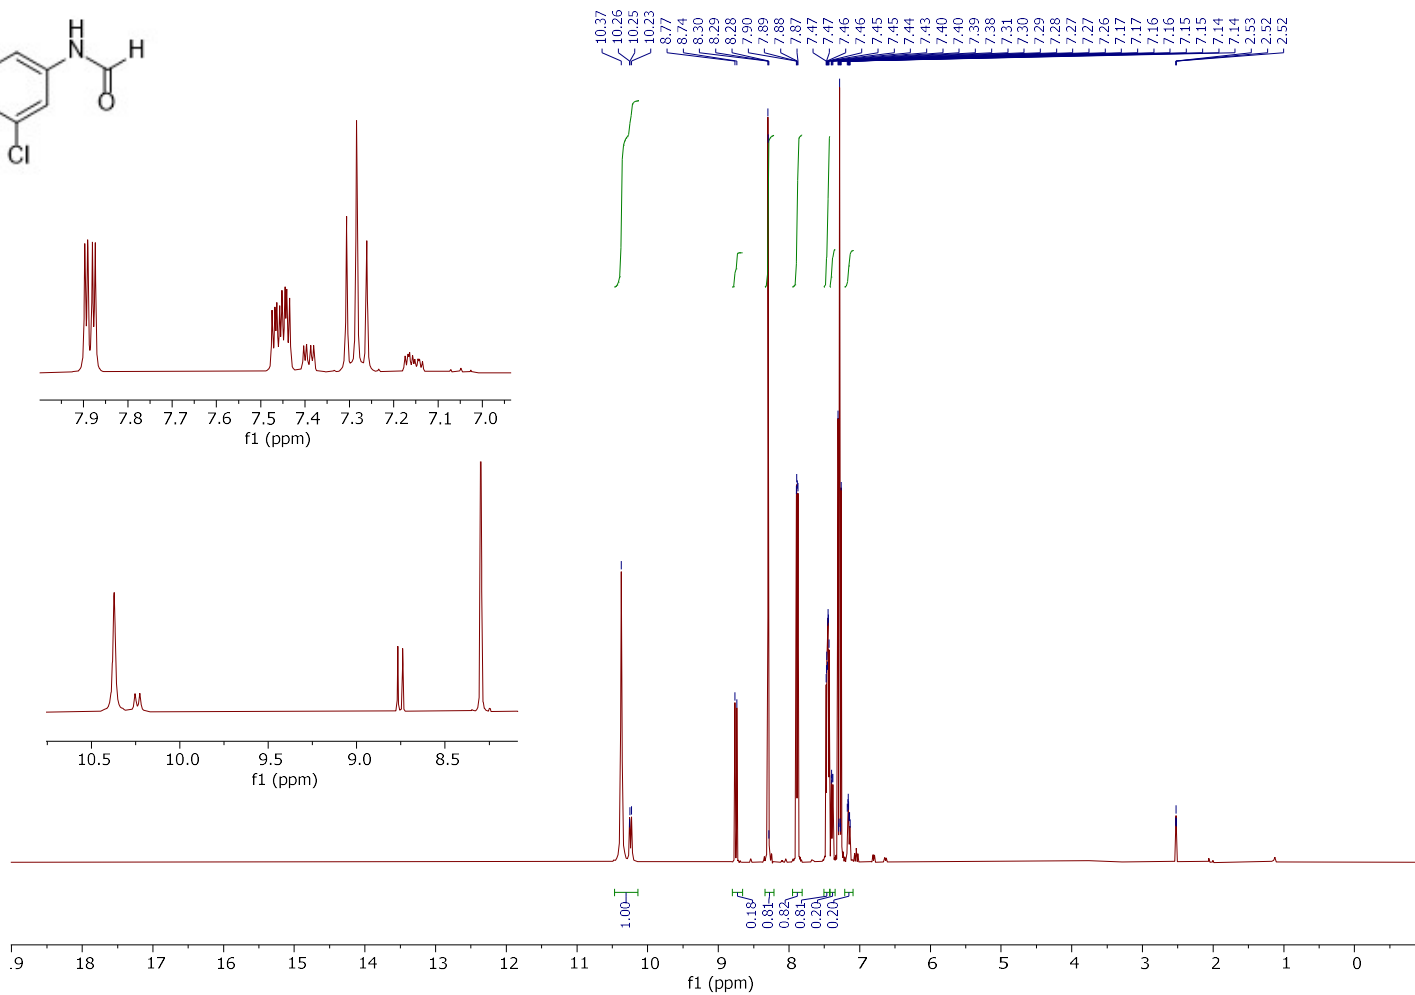

Figure S19: <sup>1</sup>H NMR Spectra of 2j

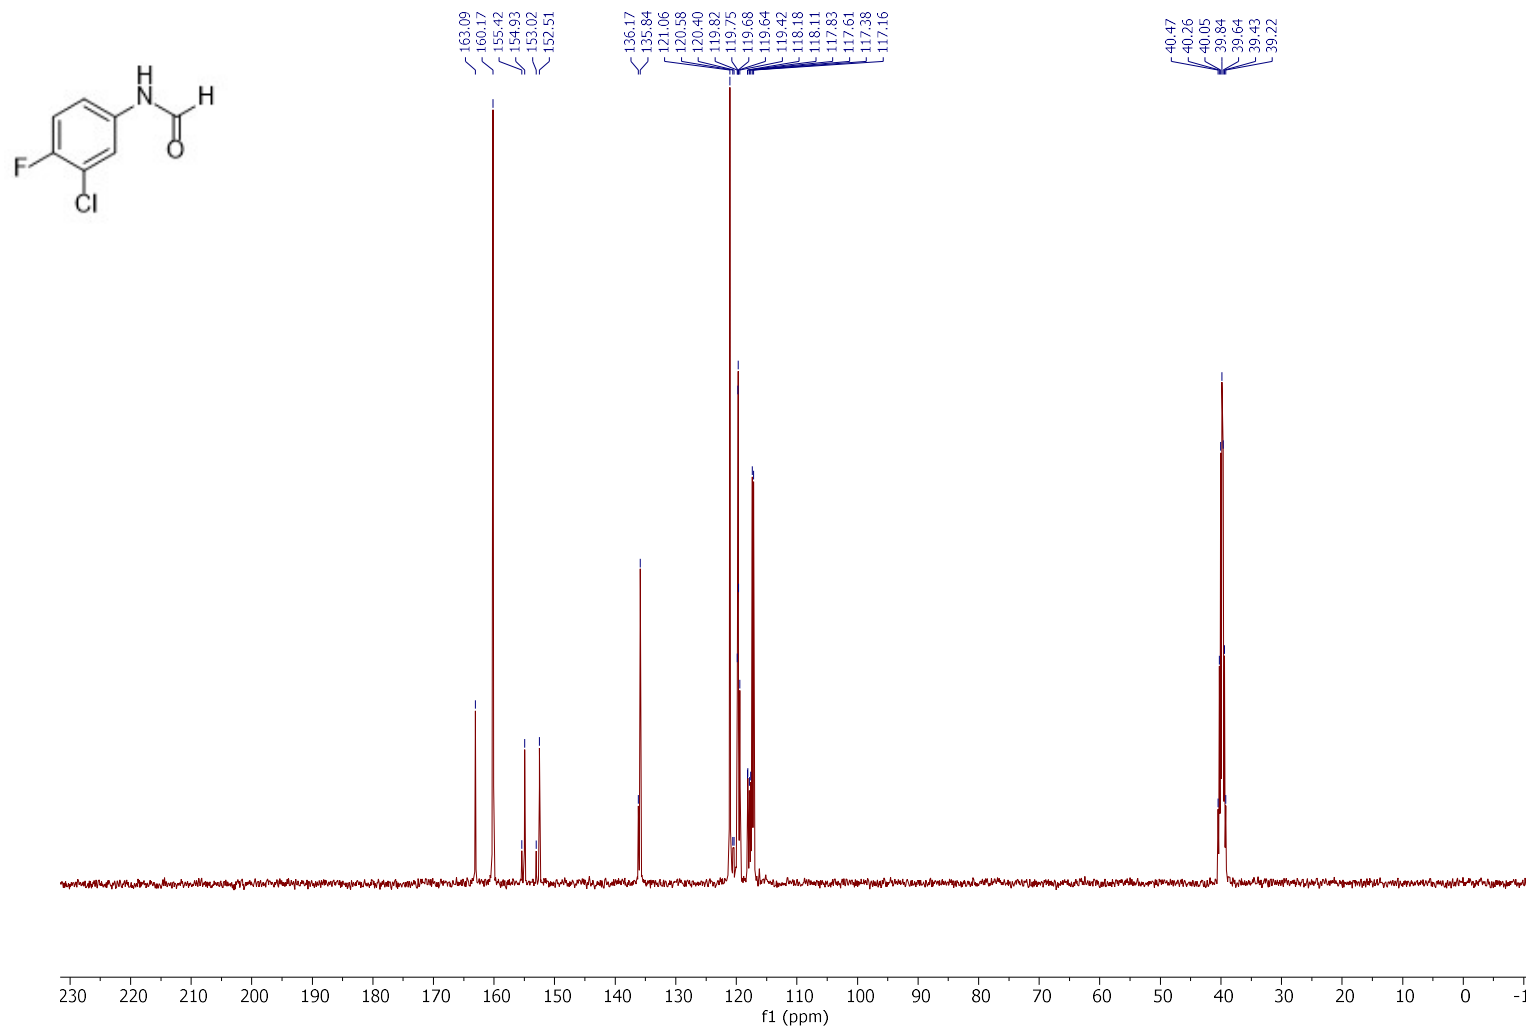

Figure S20: <sup>13</sup>C NMR Spectra of 2j



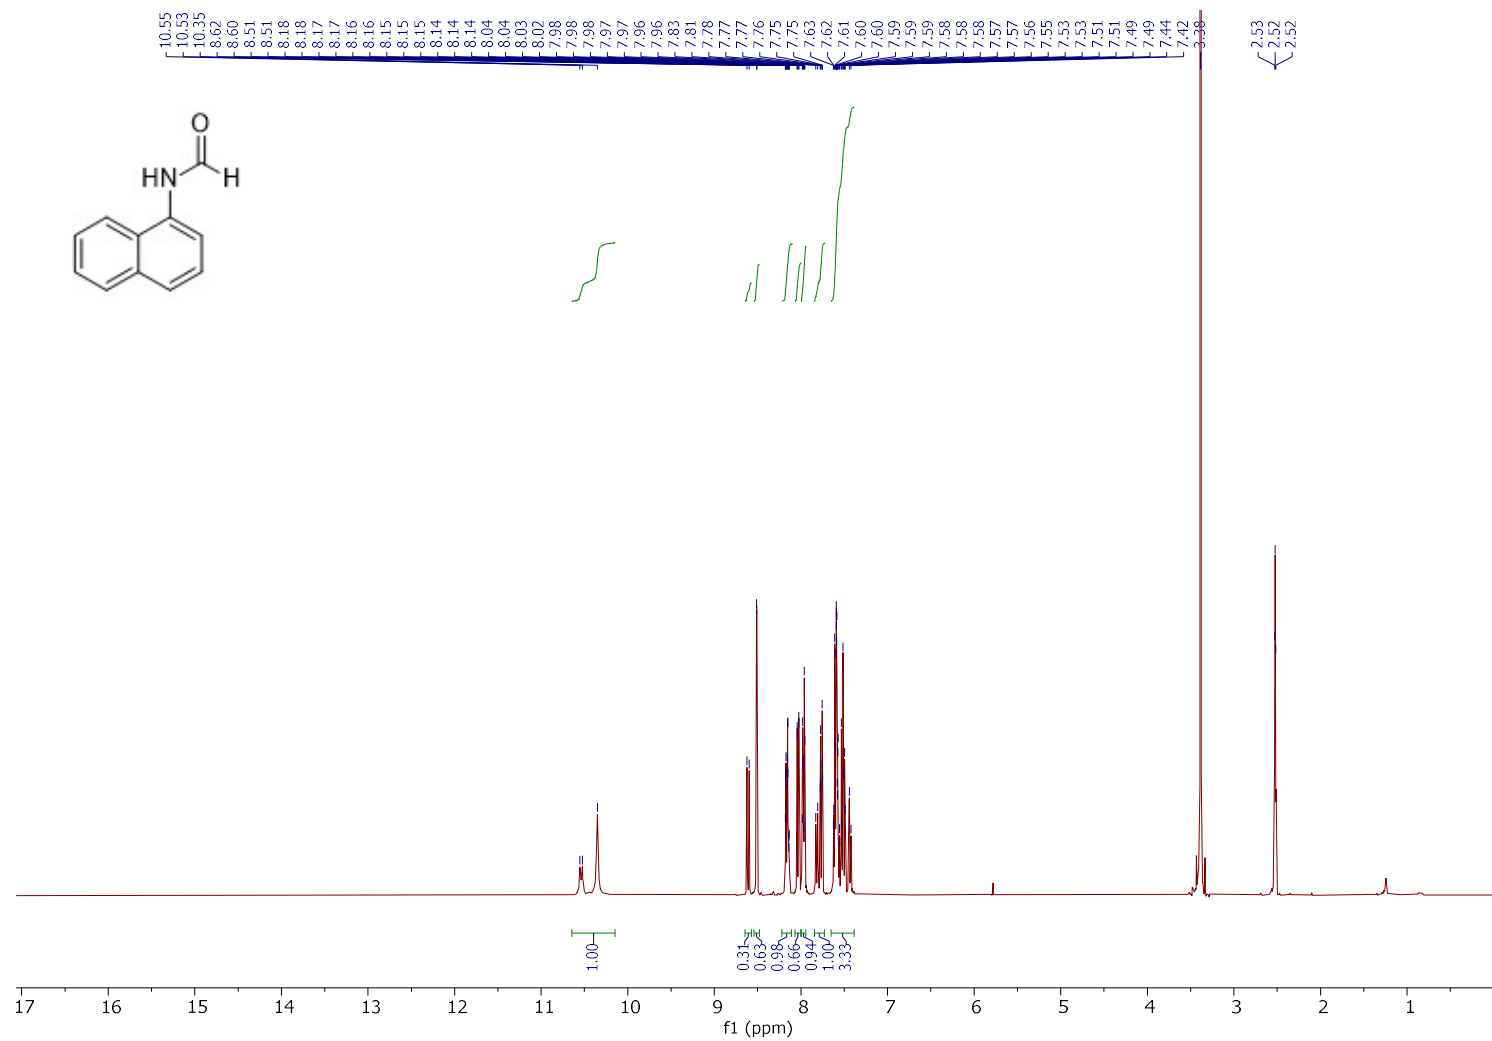

Figure S21: <sup>1</sup>H NMR Spectra of 2n

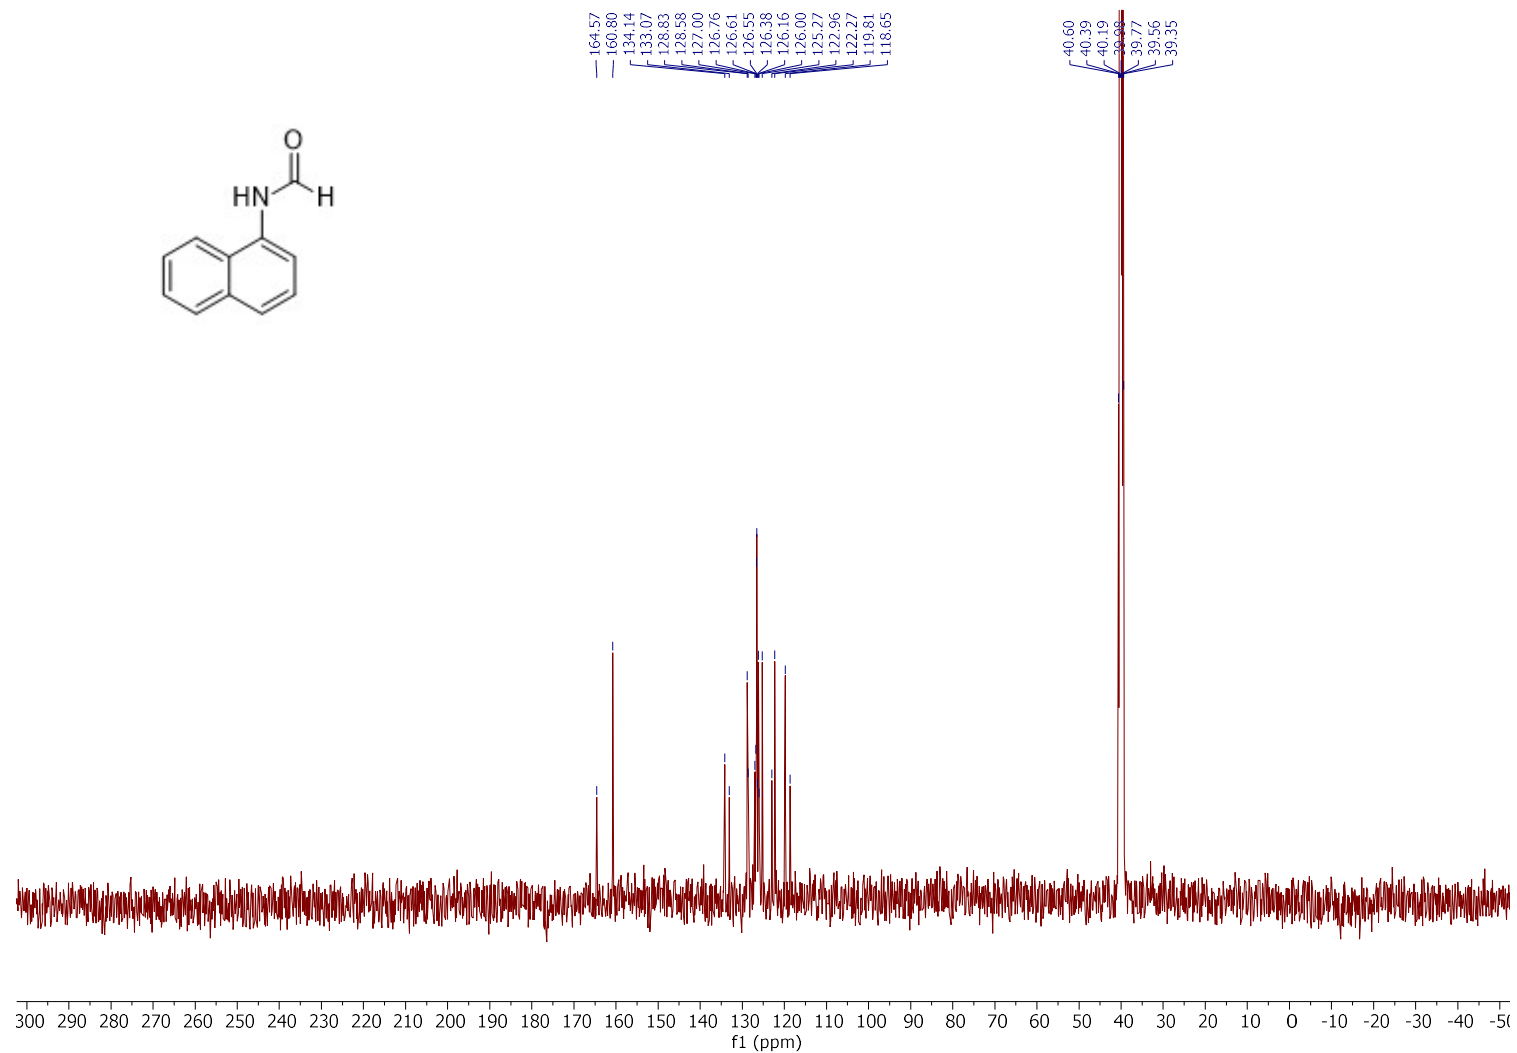

Figure S22: <sup>13</sup>C NMR Spectra of 2n

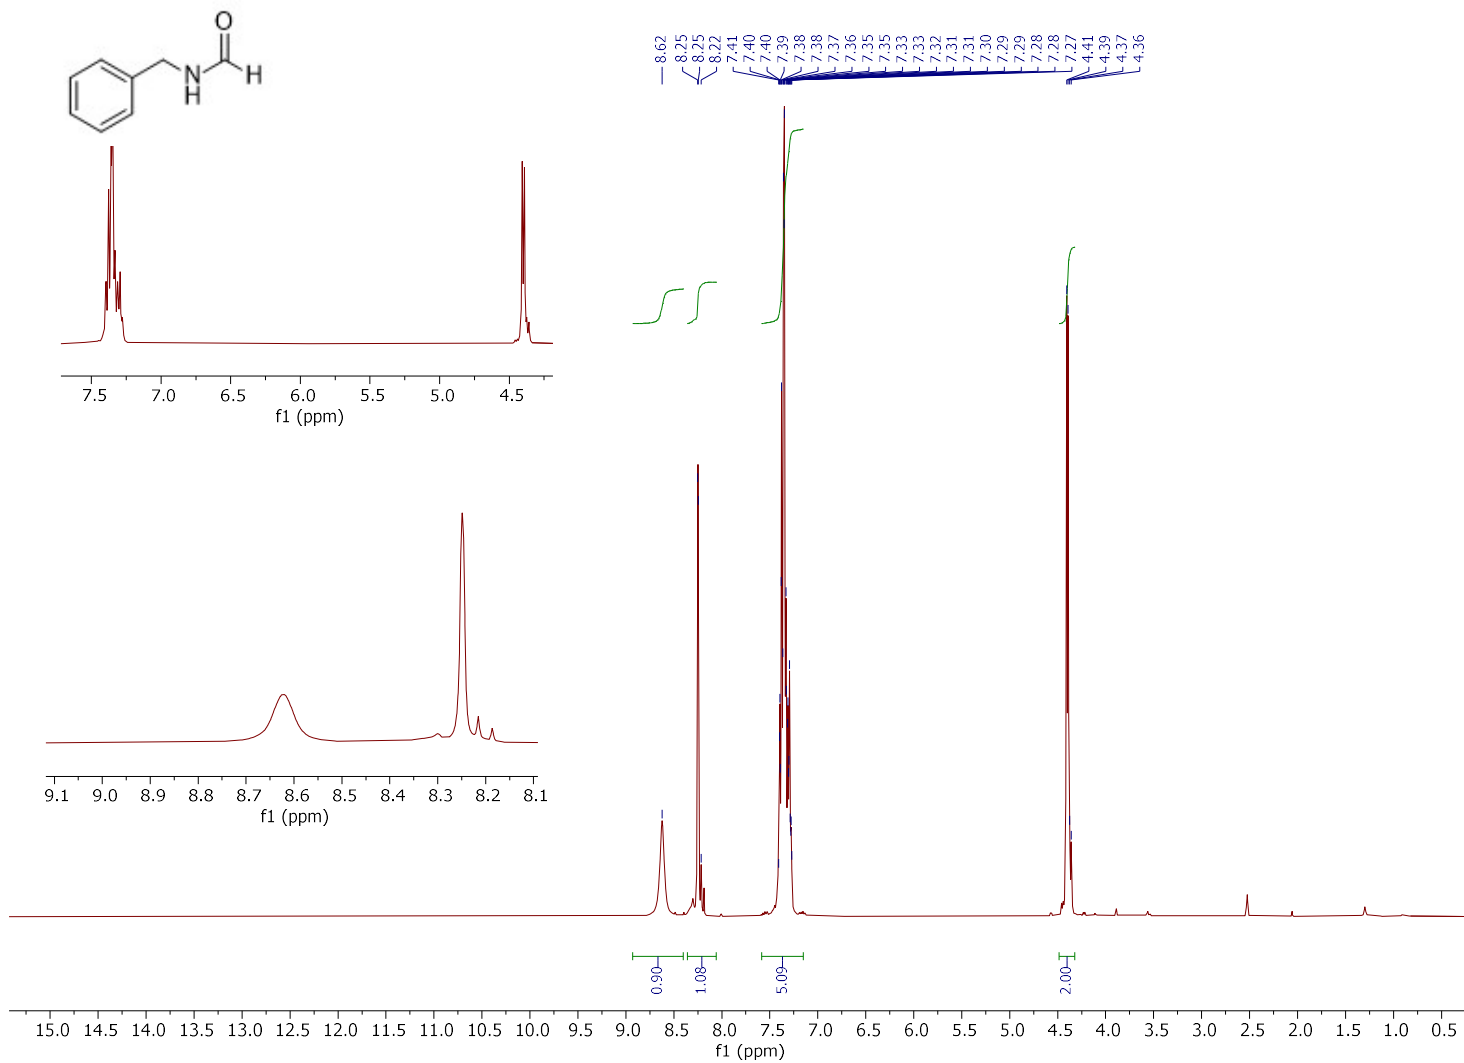

Figure S23:  $^1\text{H}$  NMR Spectra of 2p

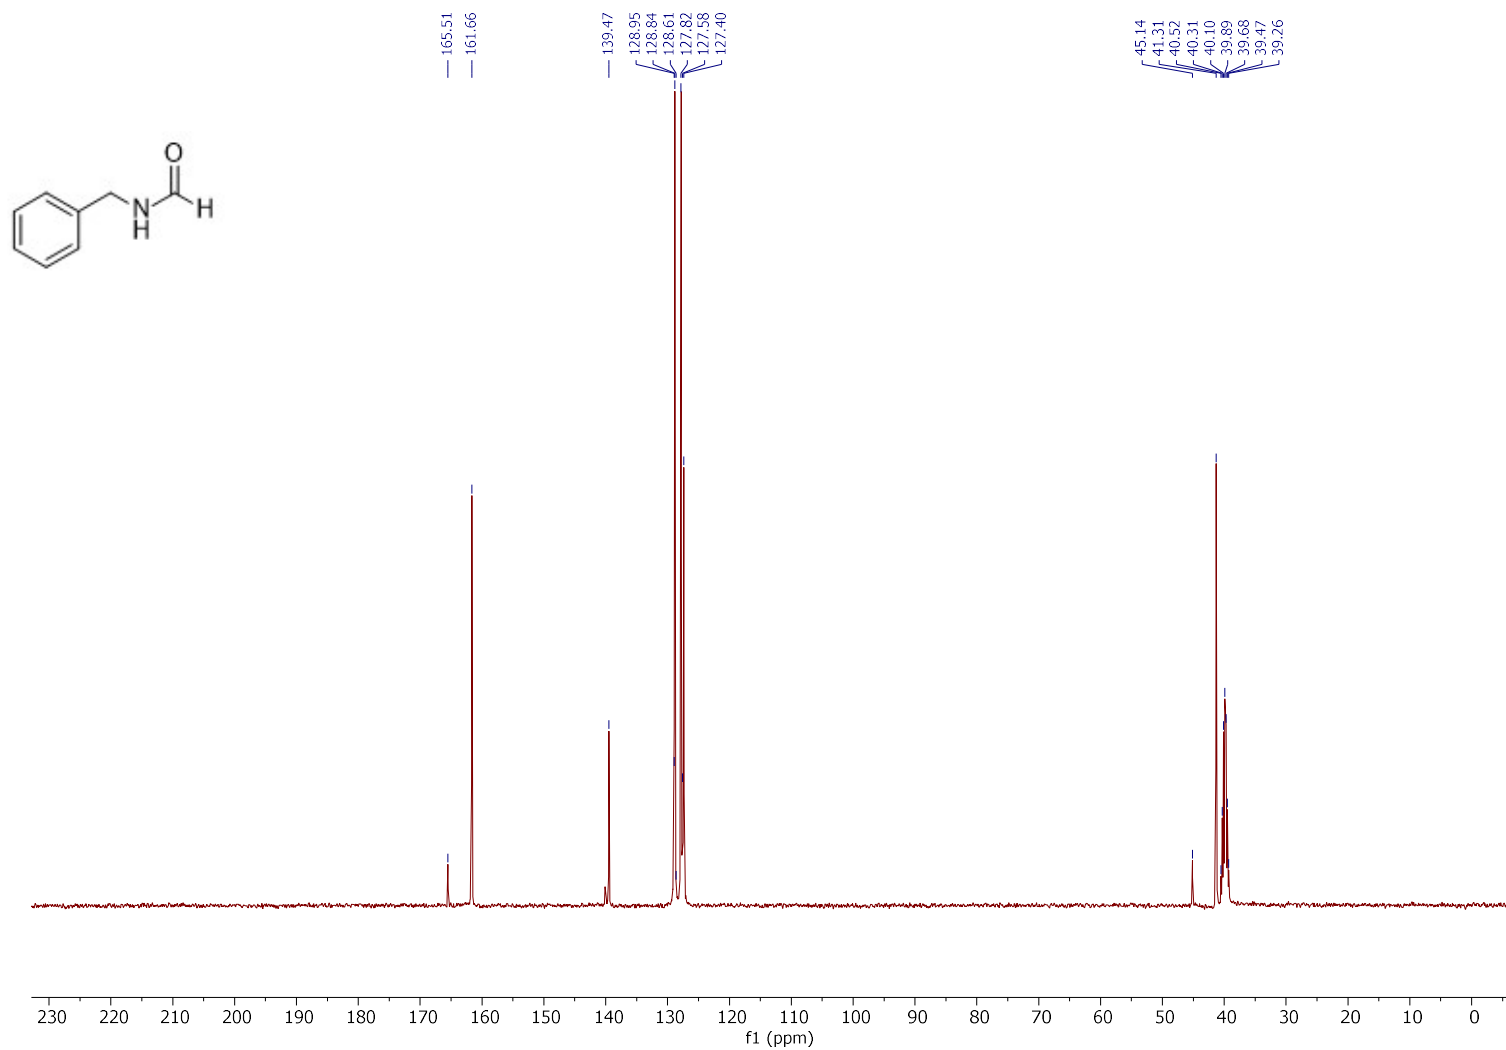

Figure S24: <sup>13</sup>C NMR Spectra of 2p

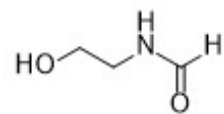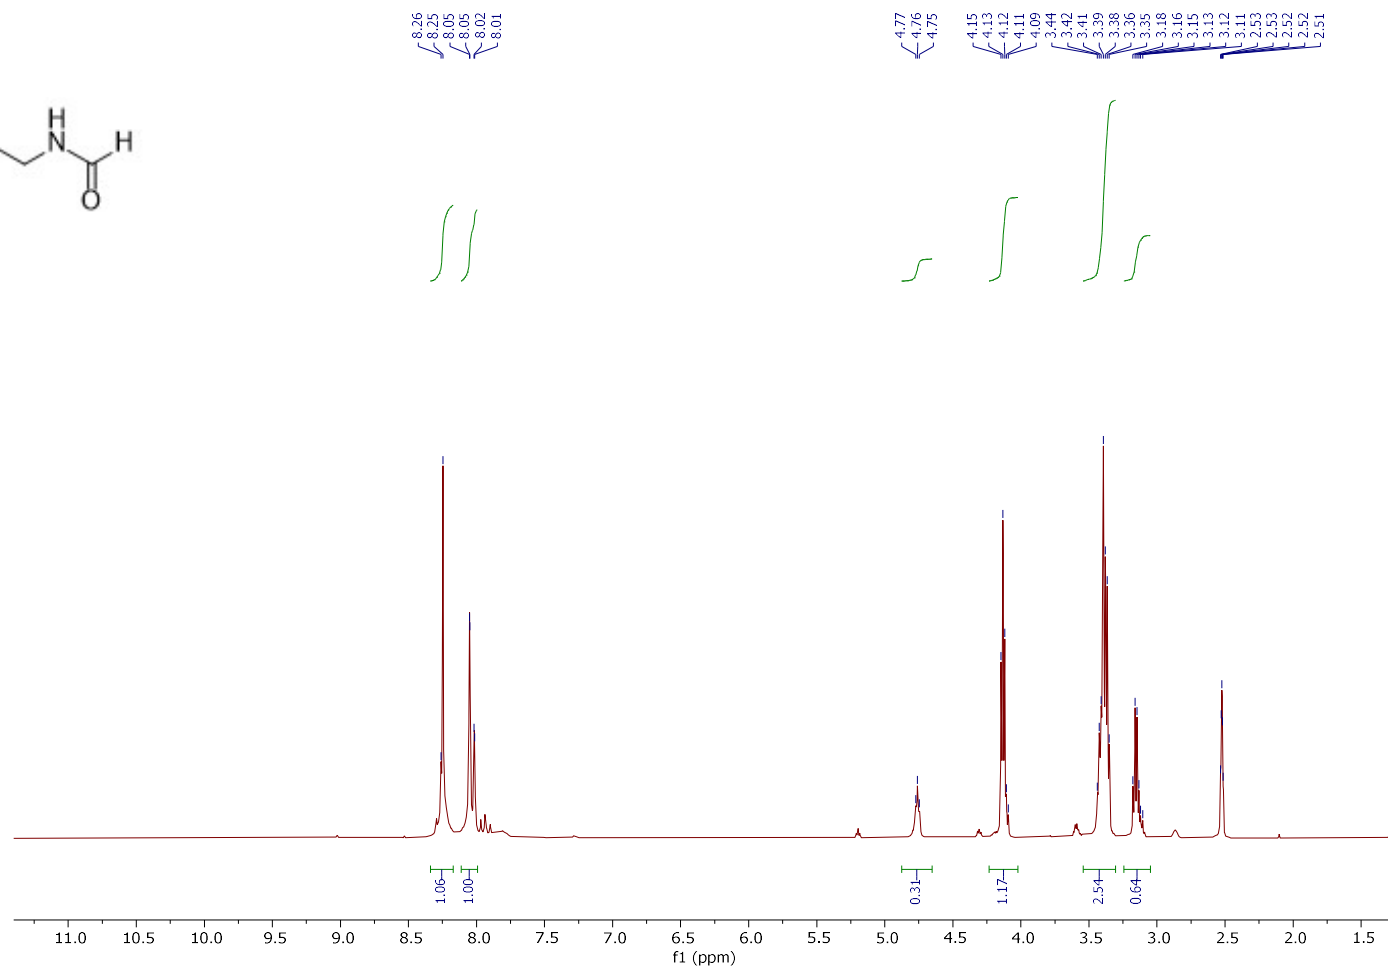

Figure S25: <sup>1</sup>H NMR Spectra of 2q

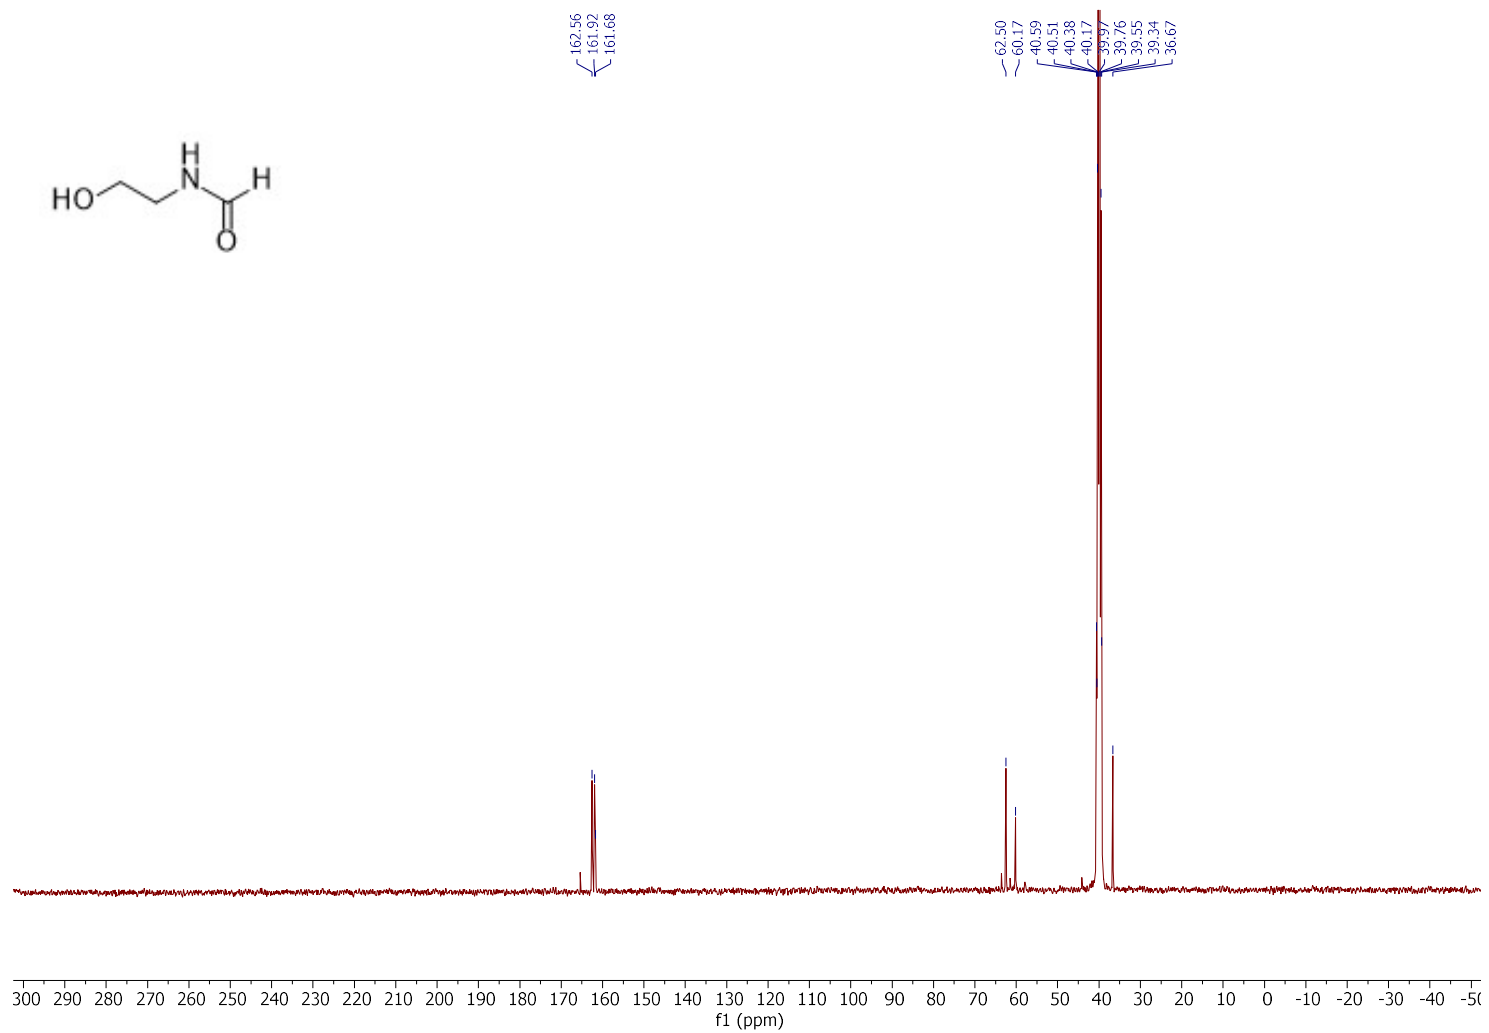

Figure S26: <sup>13</sup>C NMR Spectra of 2q

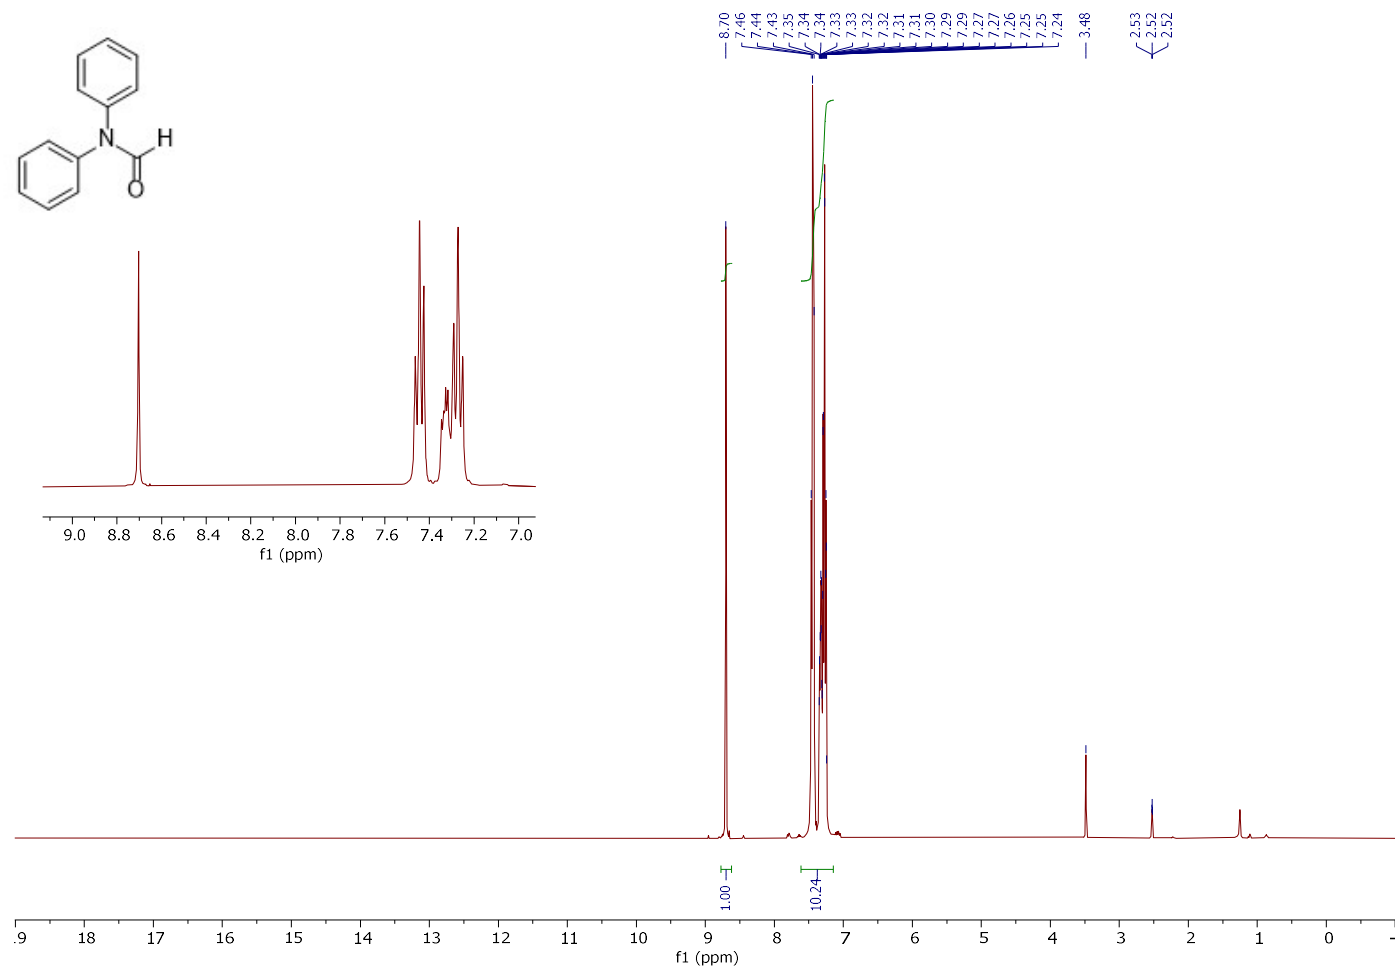

Figure S25: <sup>1</sup>H NMR Spectra of 2r

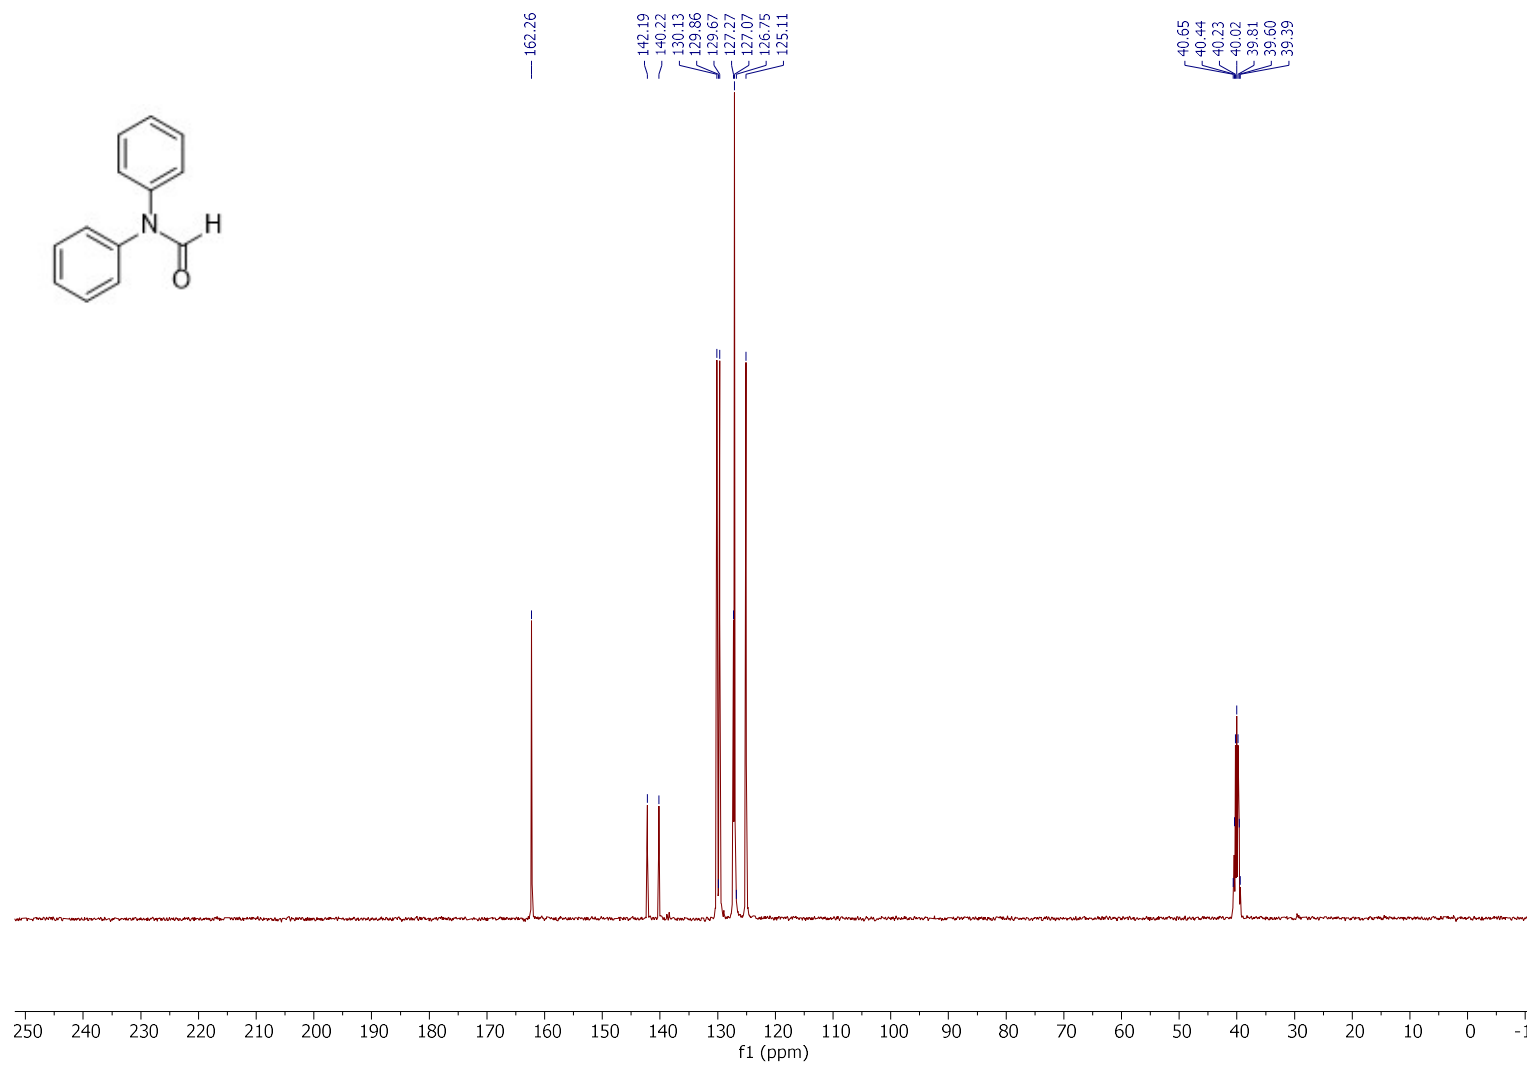

Figure S26: <sup>13</sup>C NMR Spectra of 2r



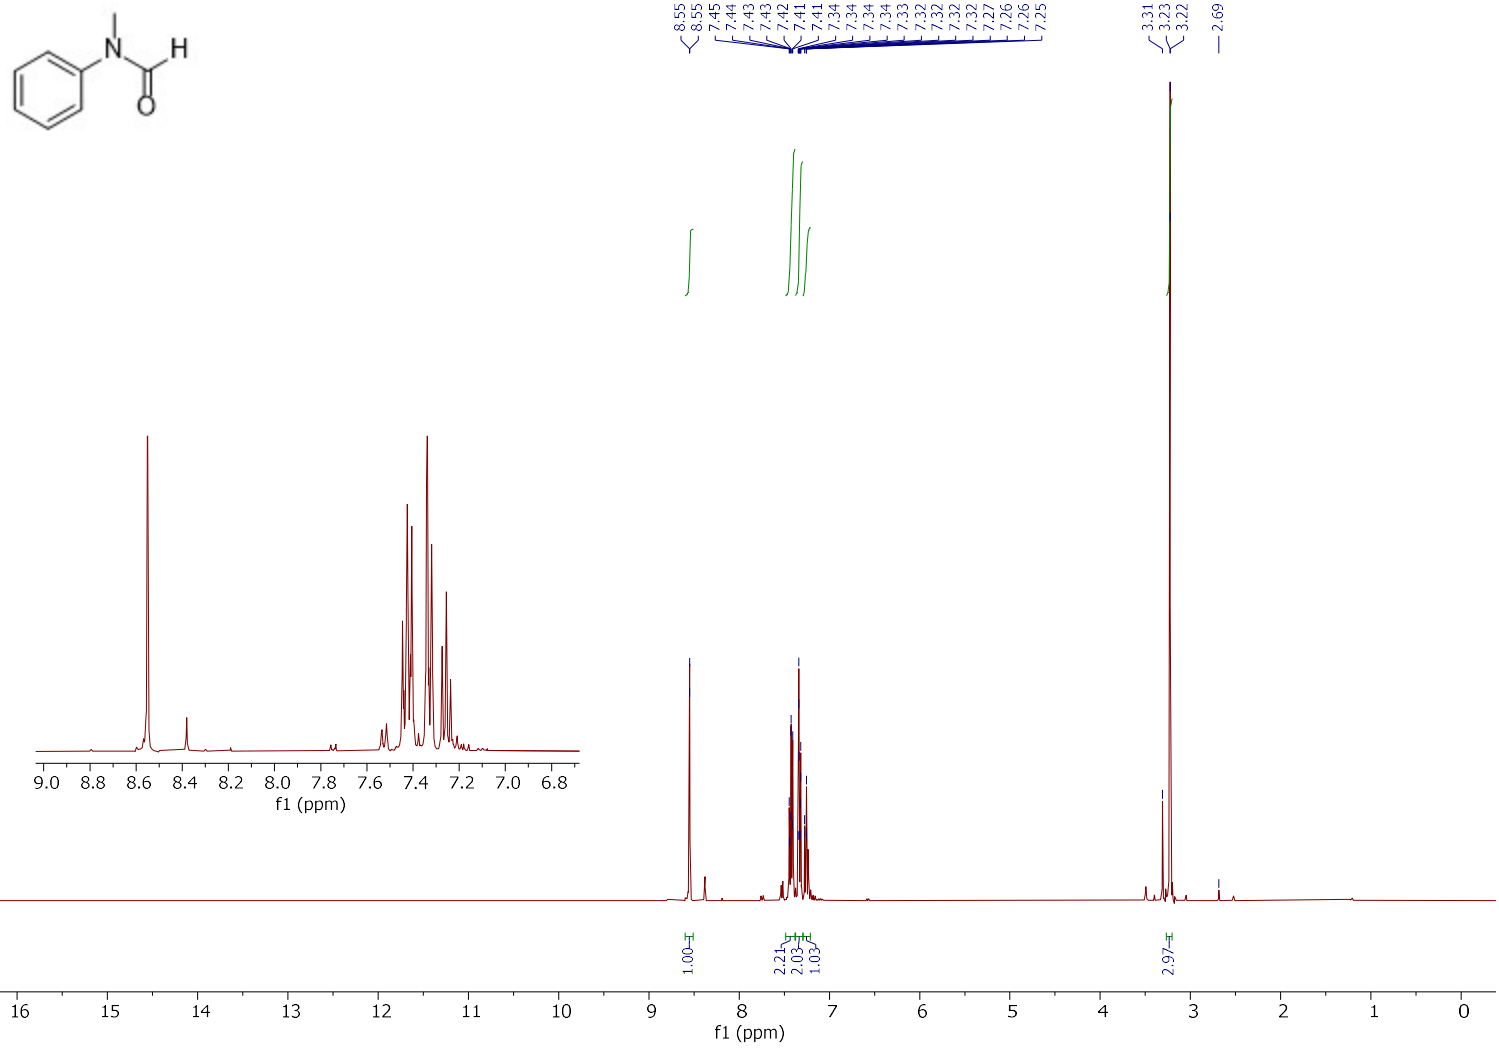

Figure S29: <sup>1</sup>H NMR Spectra of 2s

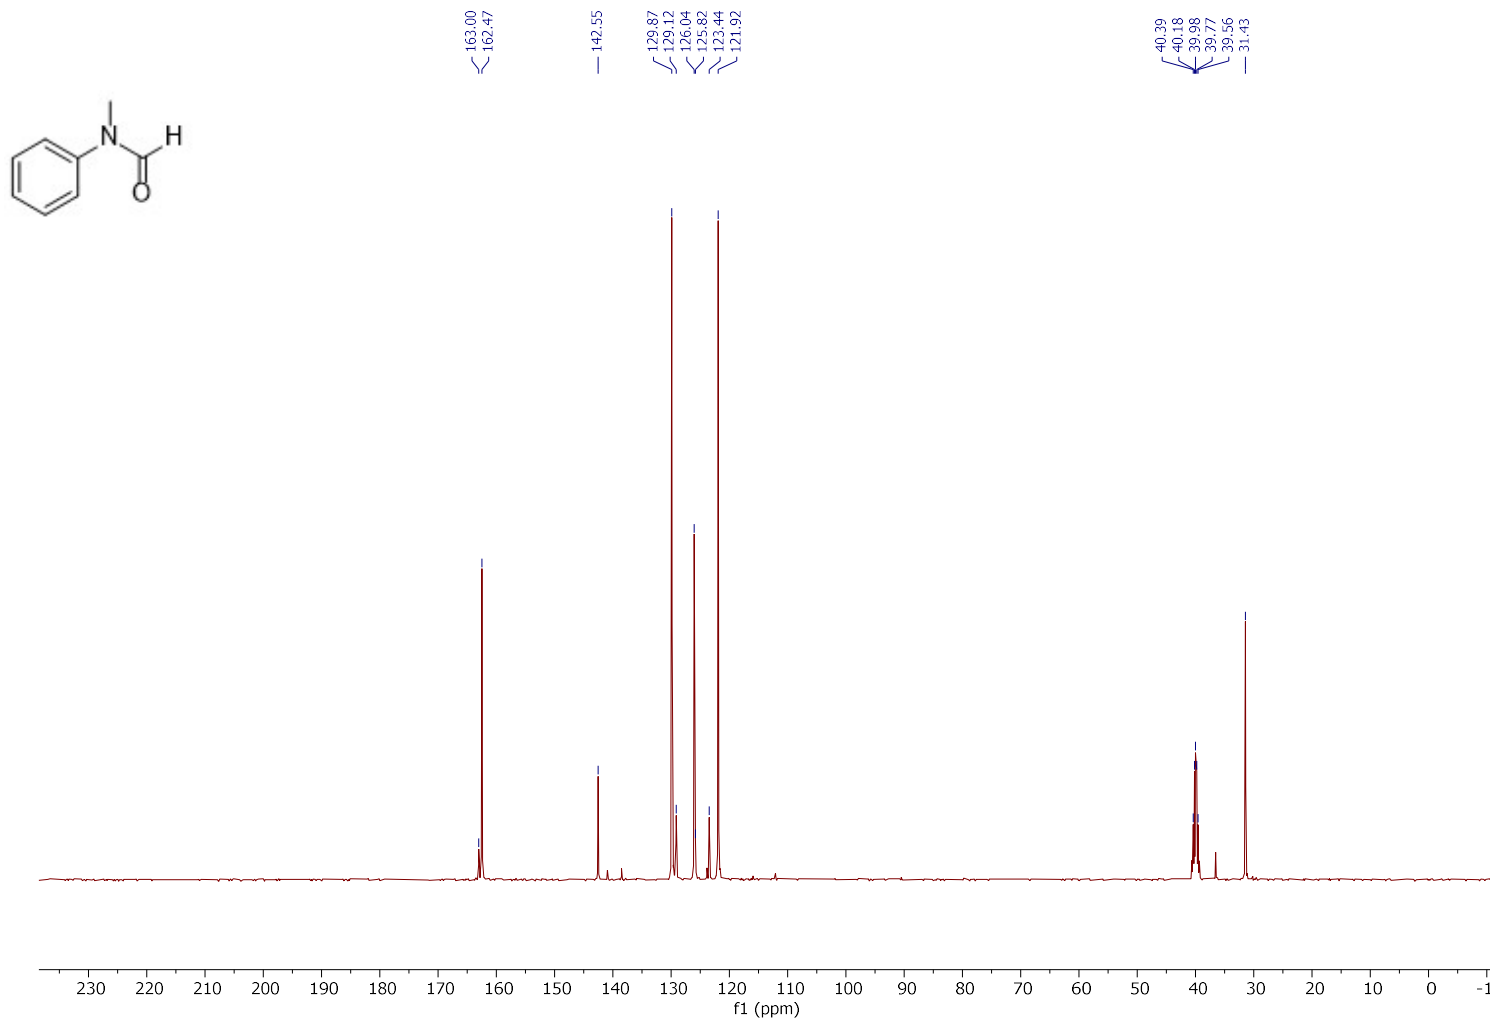

Figure S30: <sup>13</sup>C NMR Spectra of 2s

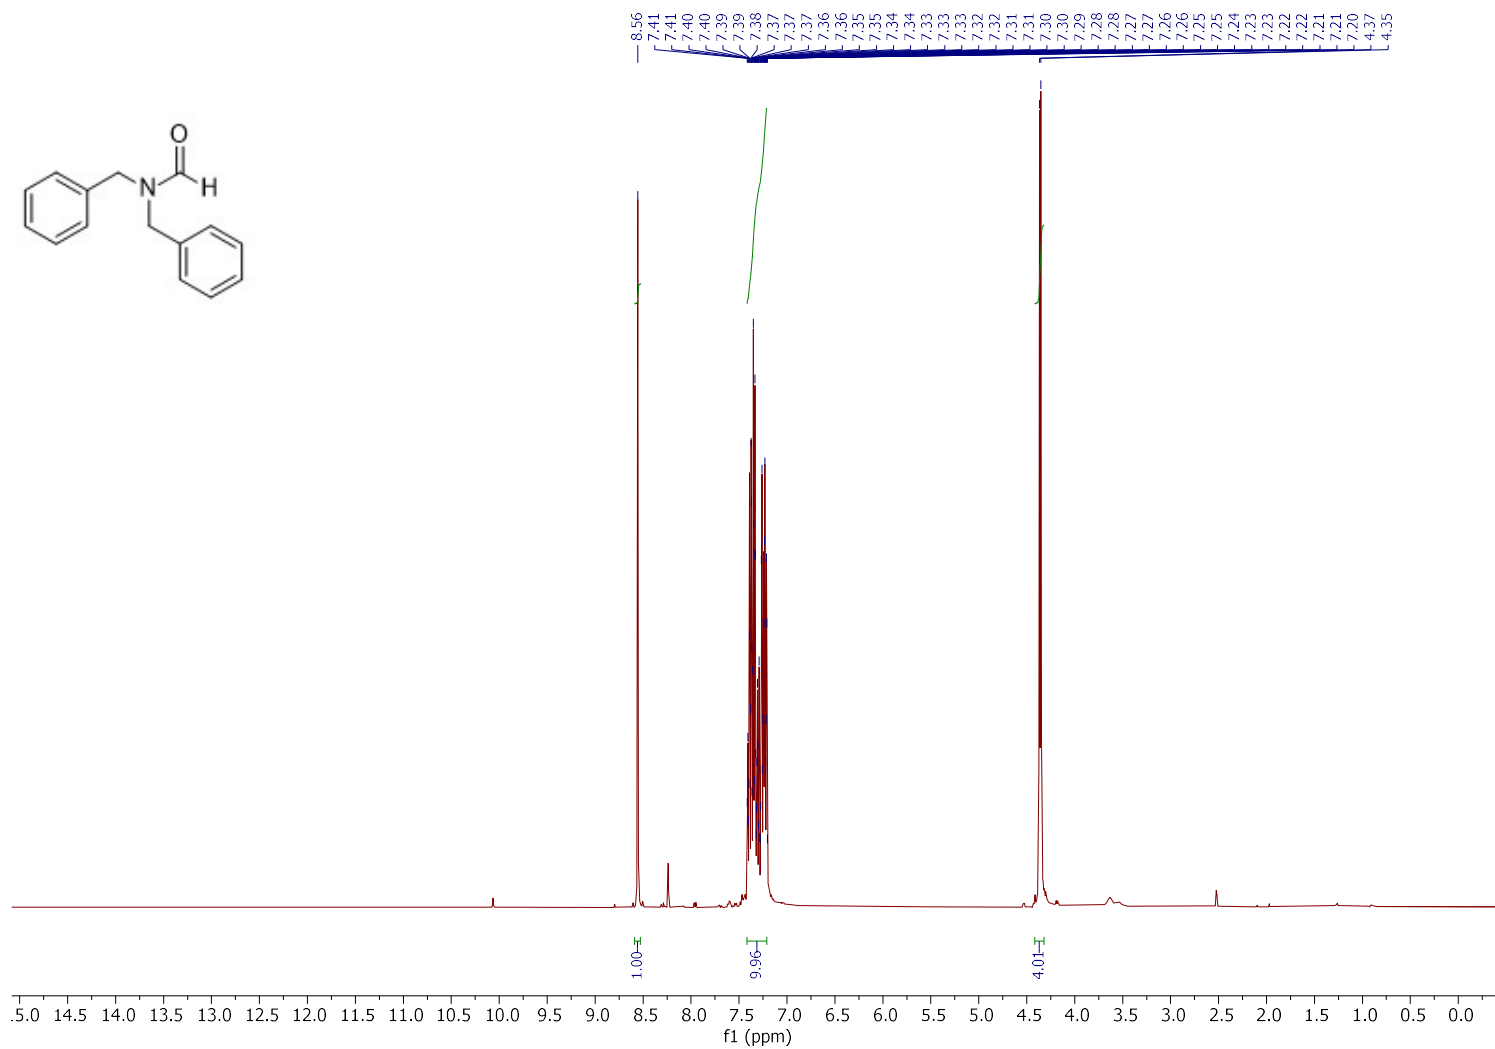

Figure S27: <sup>1</sup>H NMR Spectra of 2t

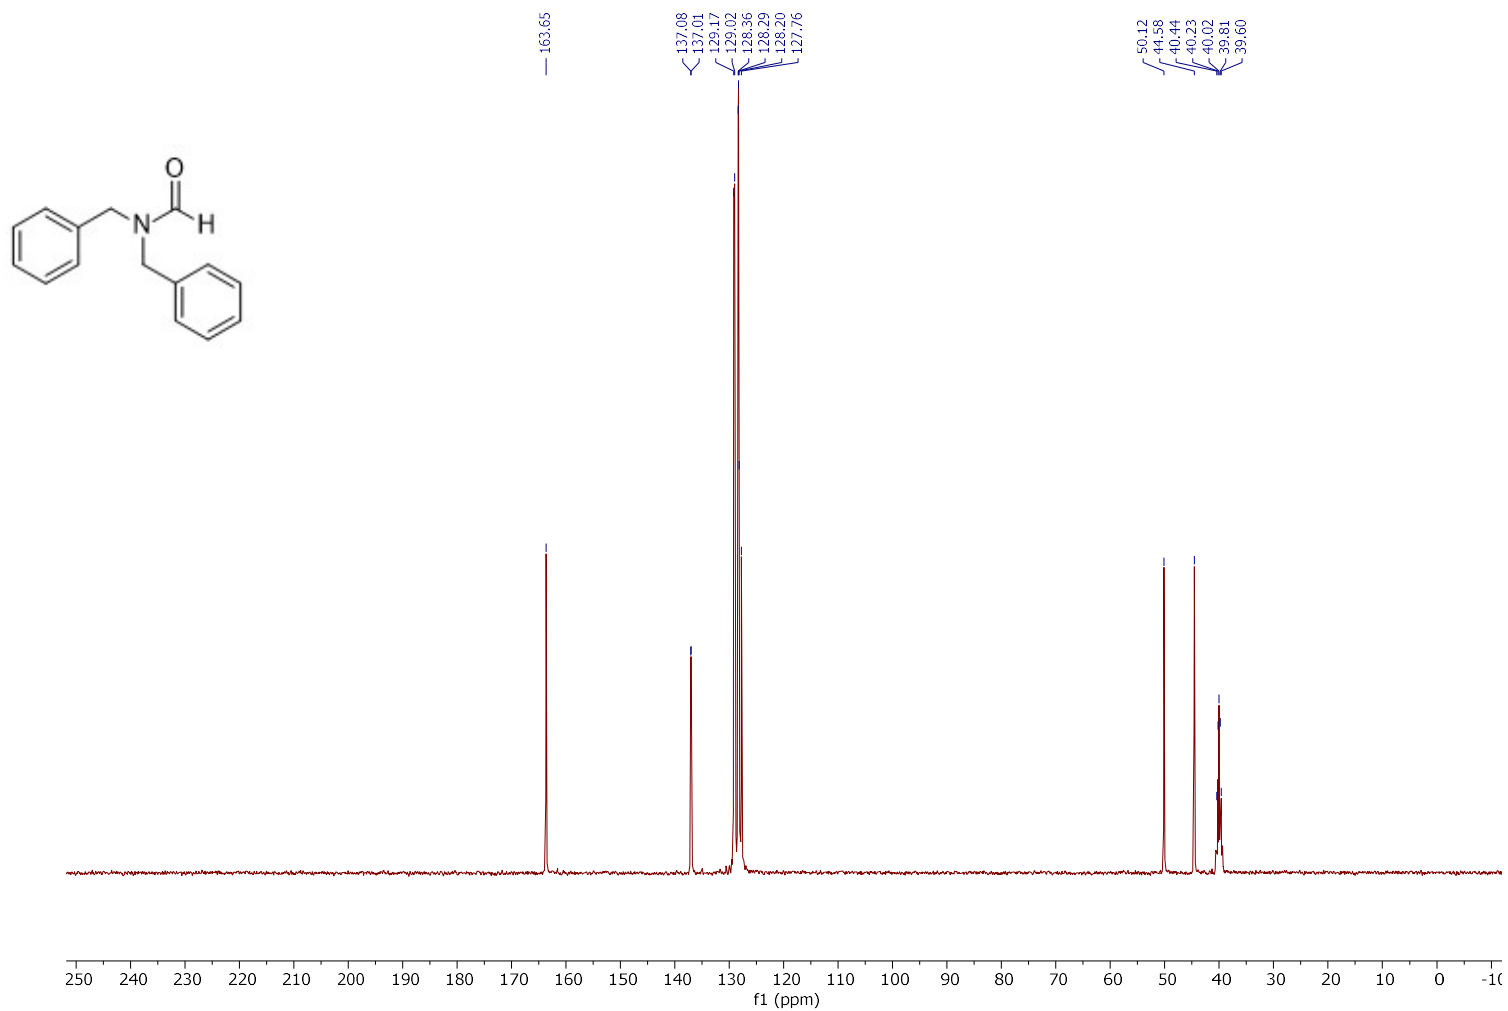

Figure S28: <sup>13</sup>C NMR Spectra of 2t

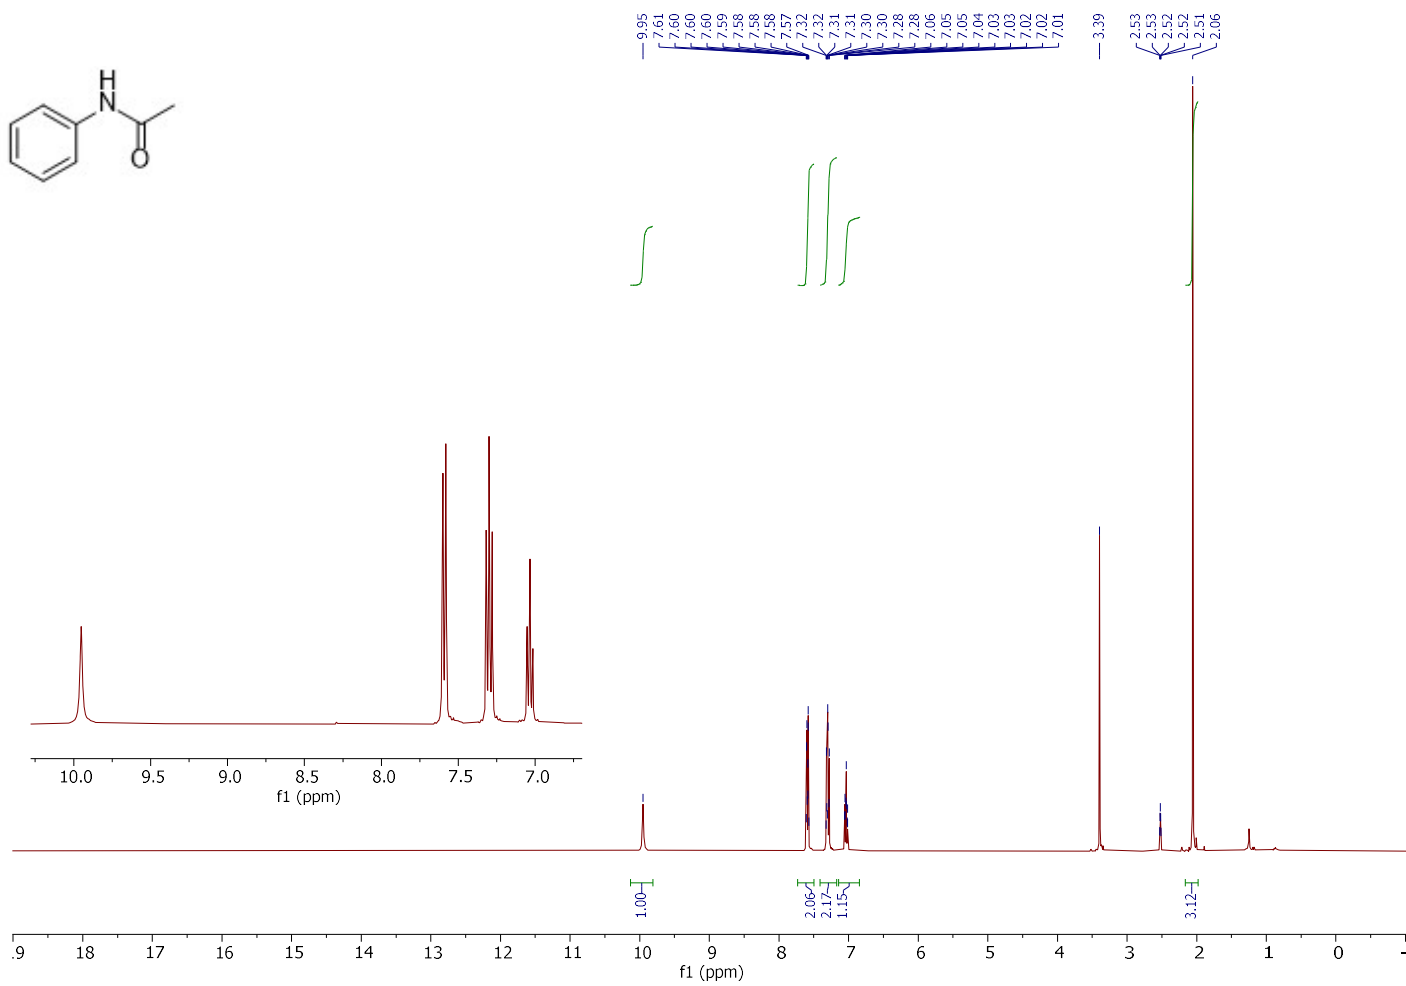

Figure S31: <sup>1</sup>H NMR Spectra of 3a

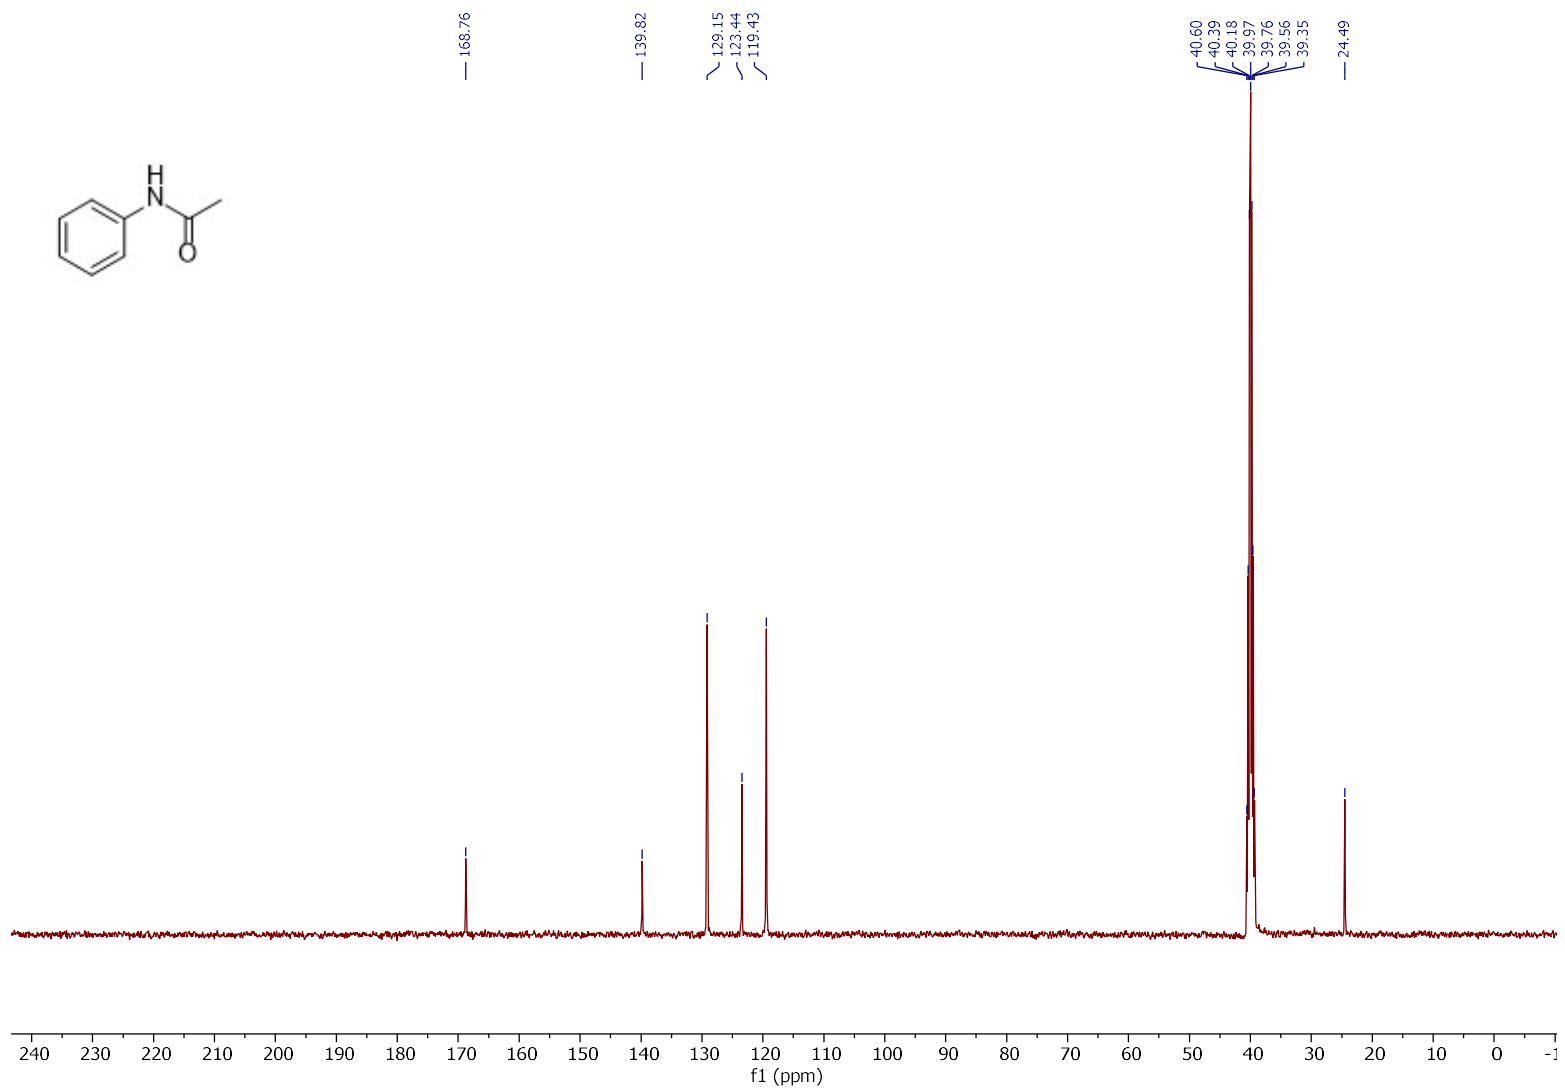

Figure S32: <sup>13</sup>C NMR Spectra of 3a

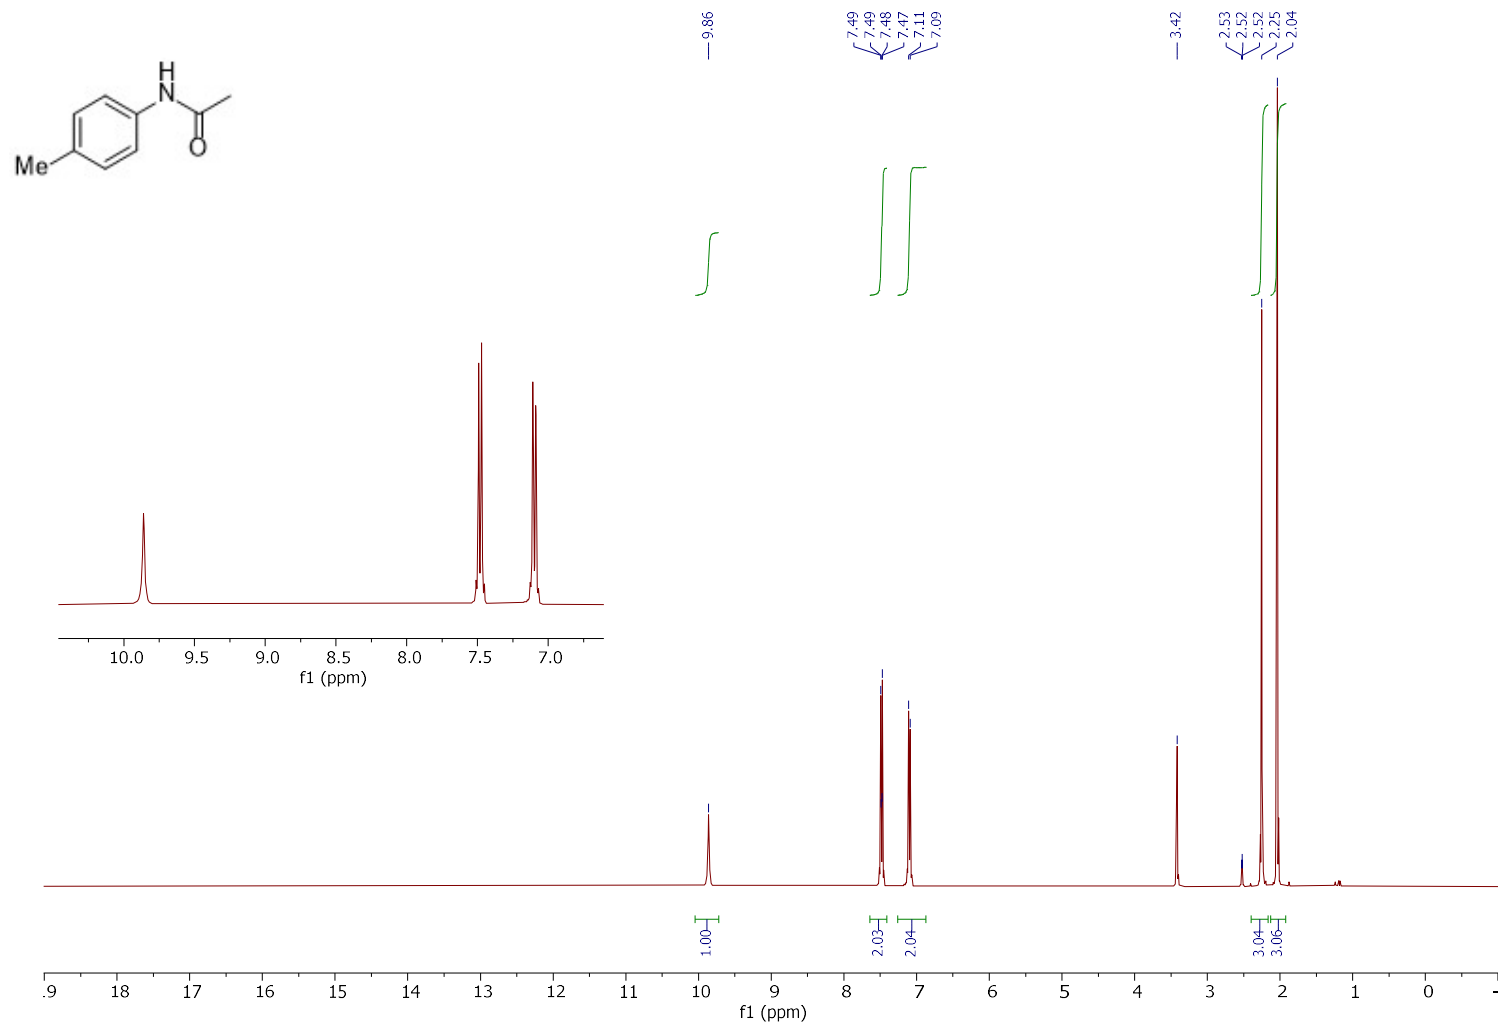

Figure S33: <sup>1</sup>H NMR Spectra of **3b**

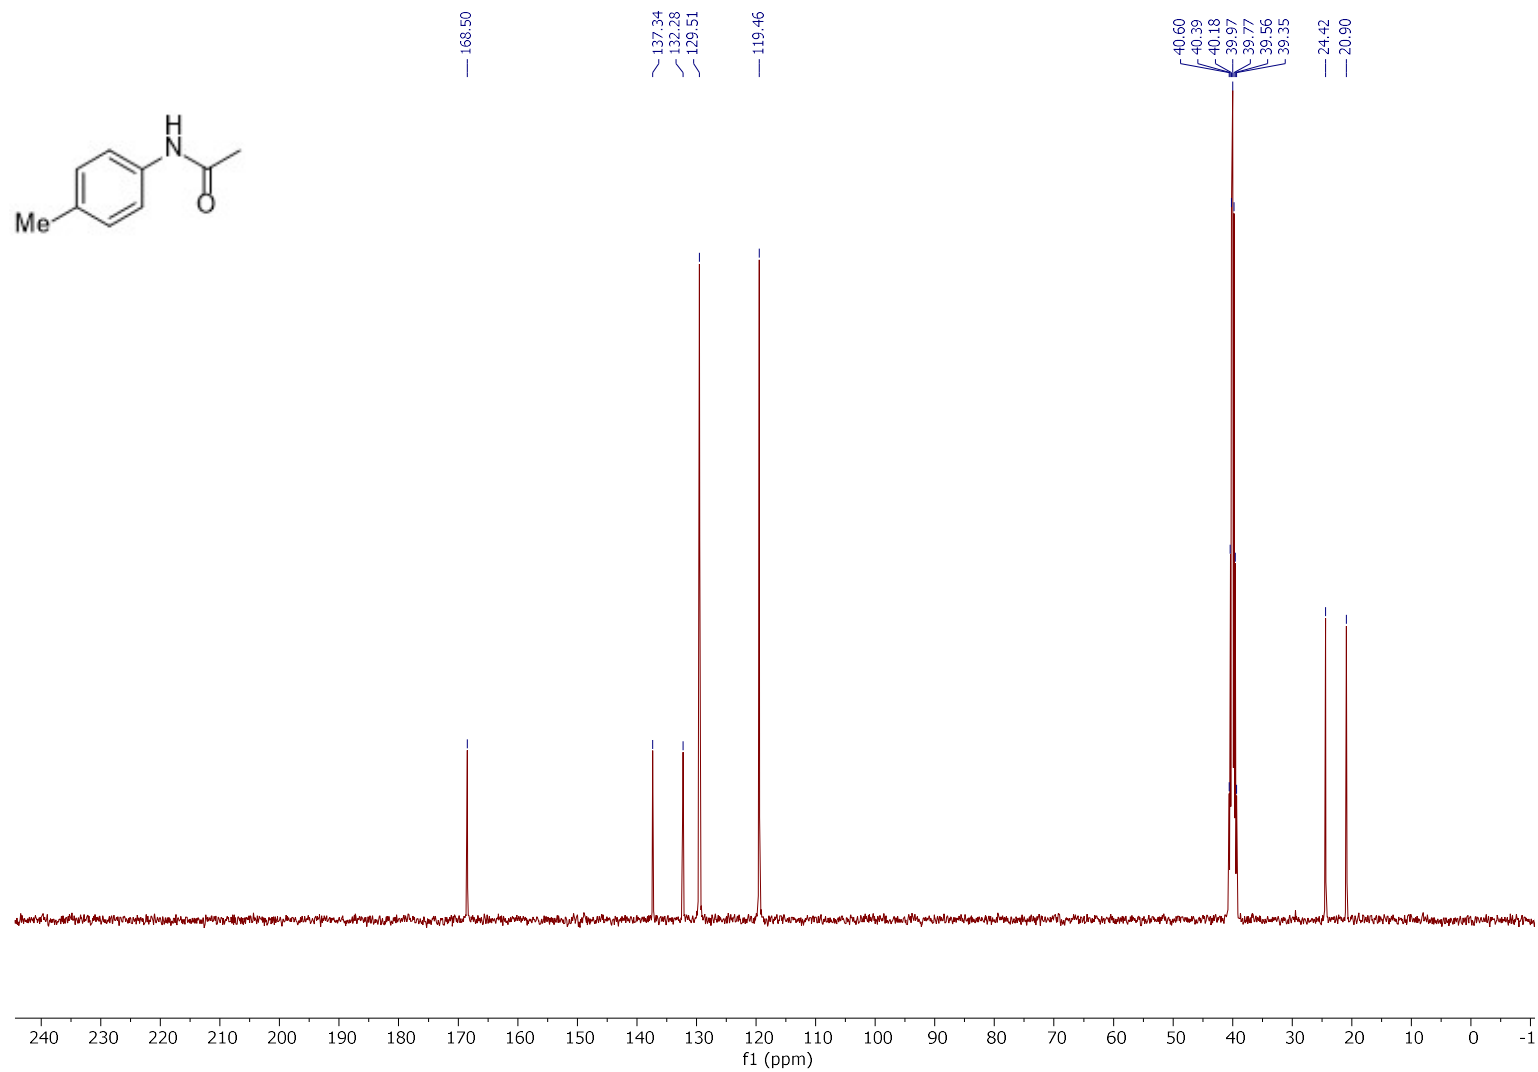

Figure S34: <sup>13</sup>C NMR Spectra of 3b



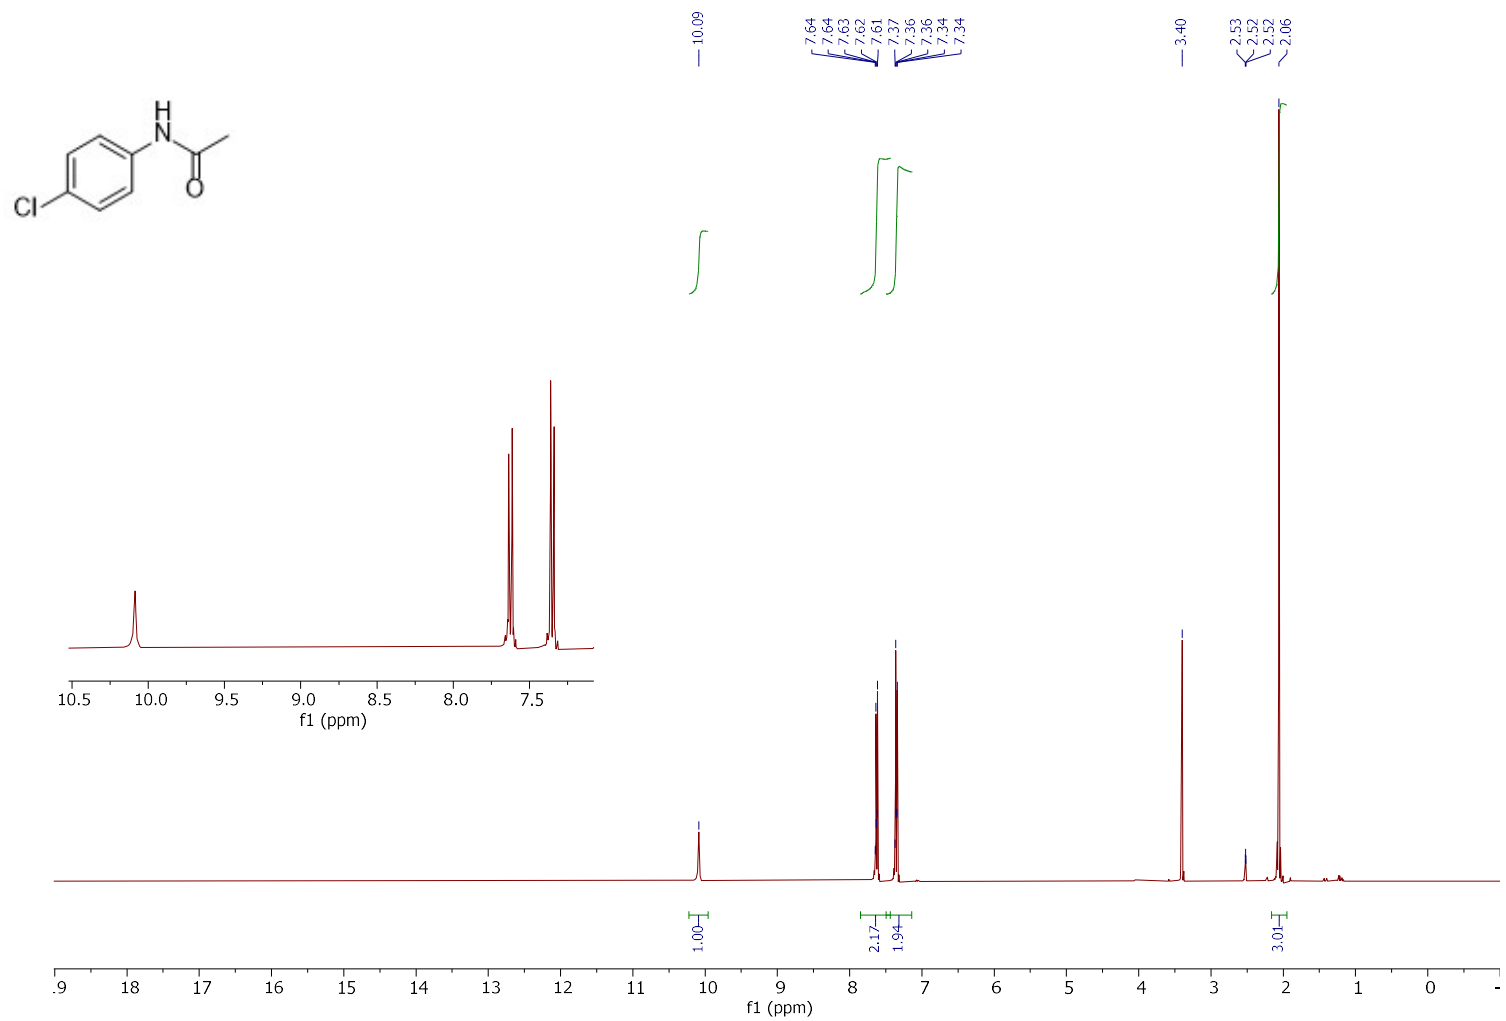

Figure S35: <sup>1</sup>H NMR Spectra of 3c

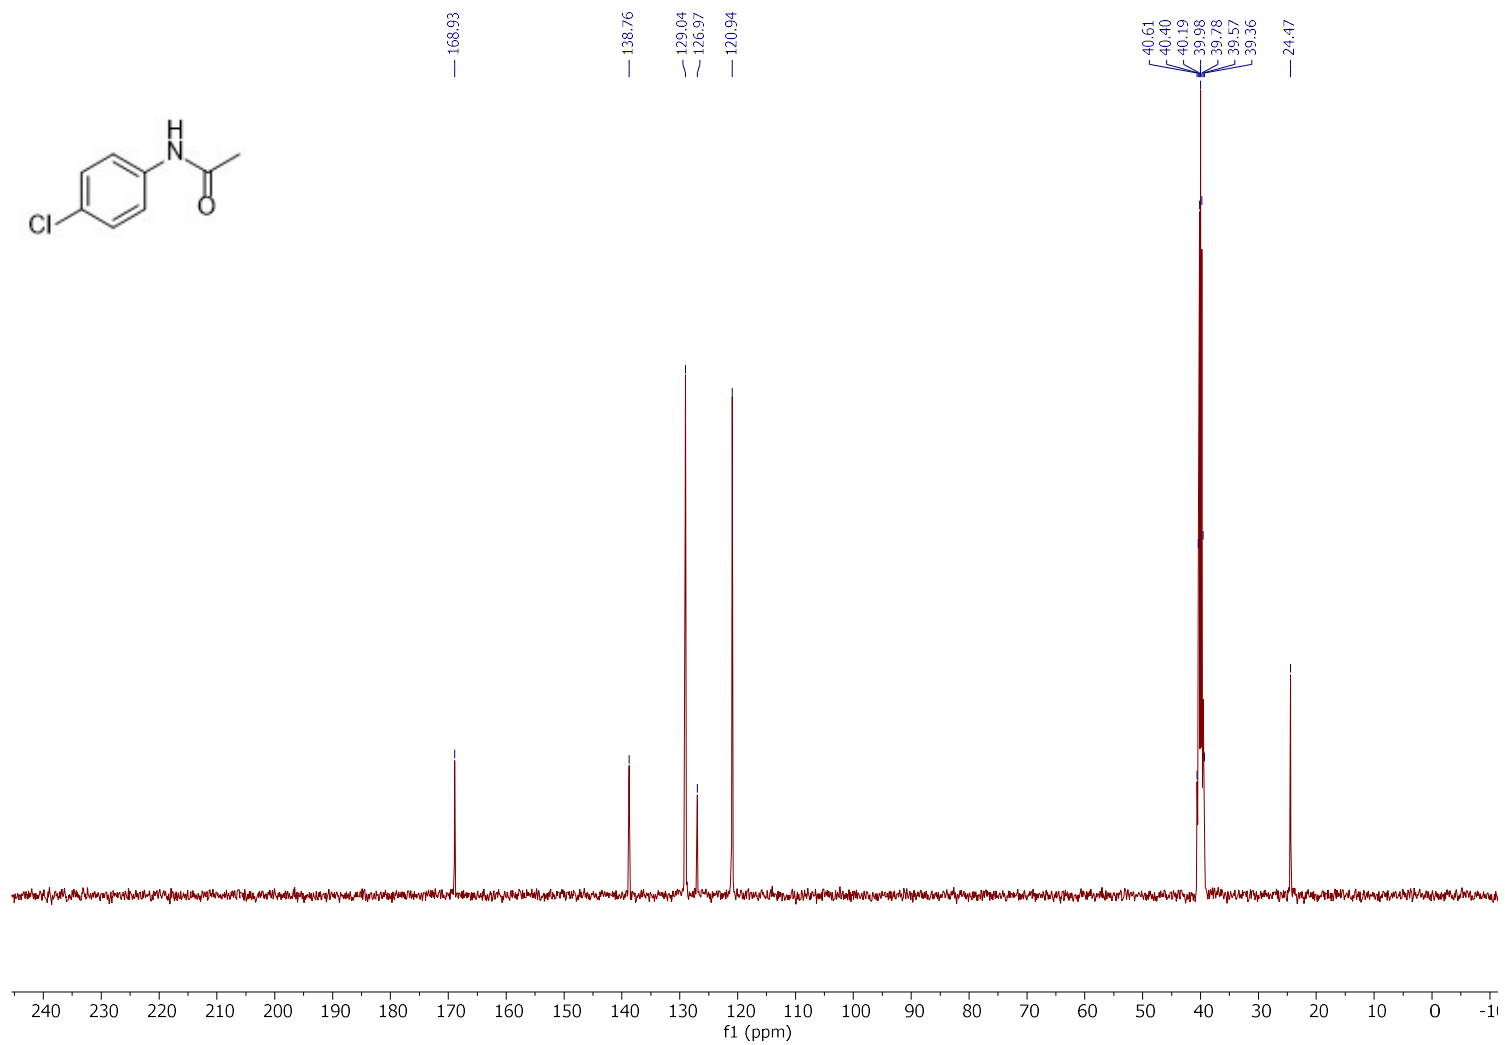

Figure S36: <sup>13</sup>C NMR Spectra of 3c

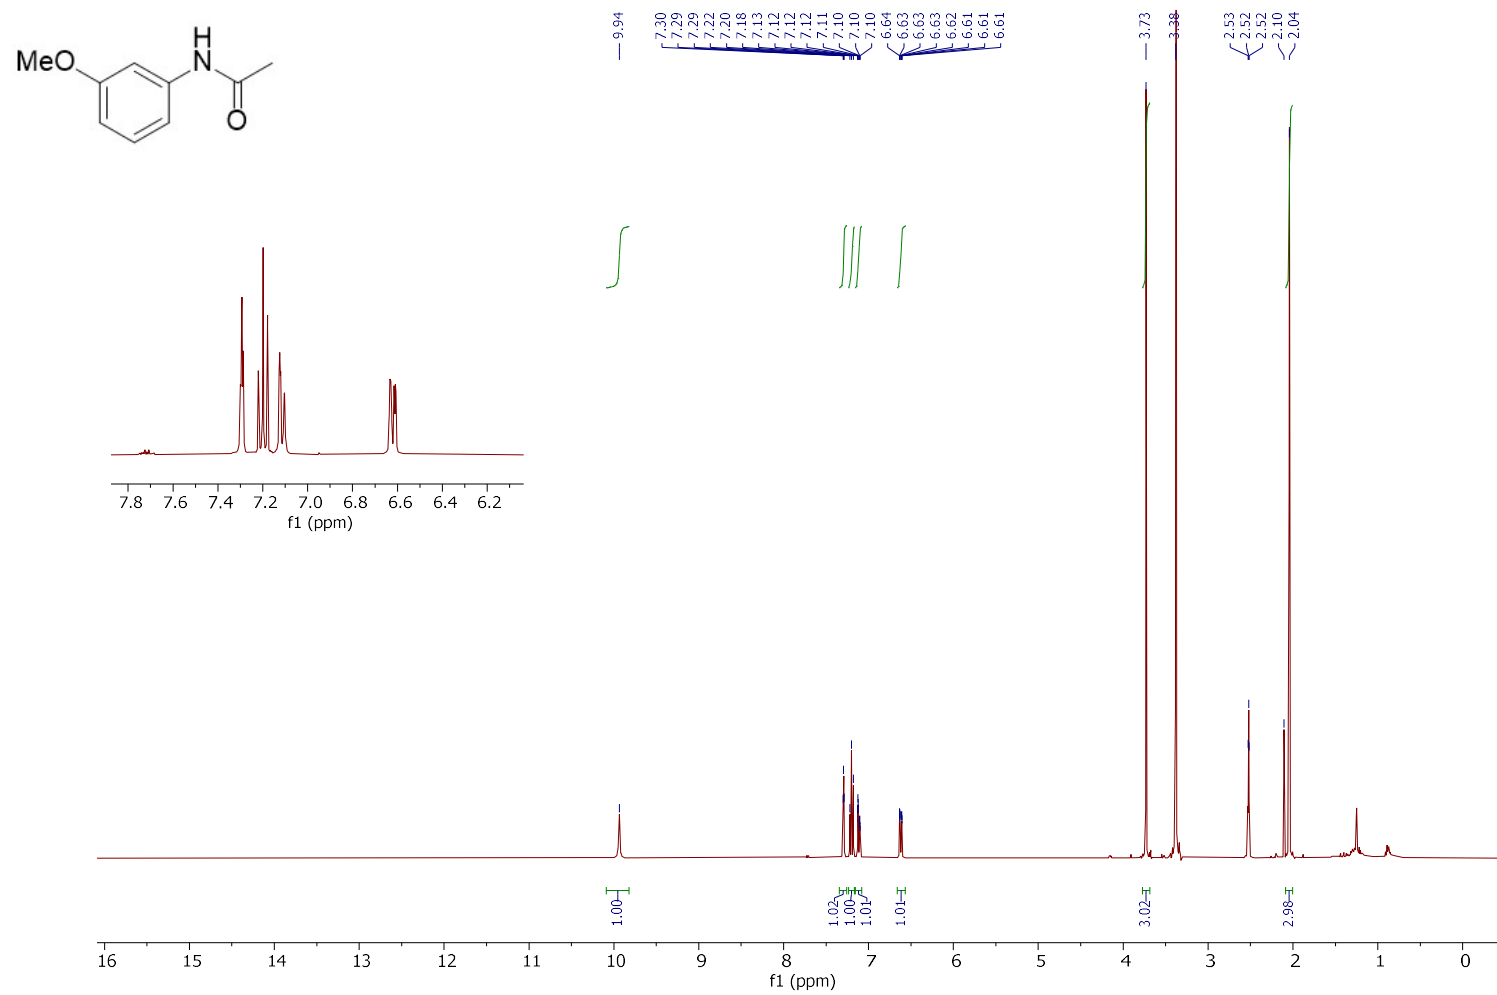

Figure S37: <sup>1</sup>H NMR Spectra of 3d

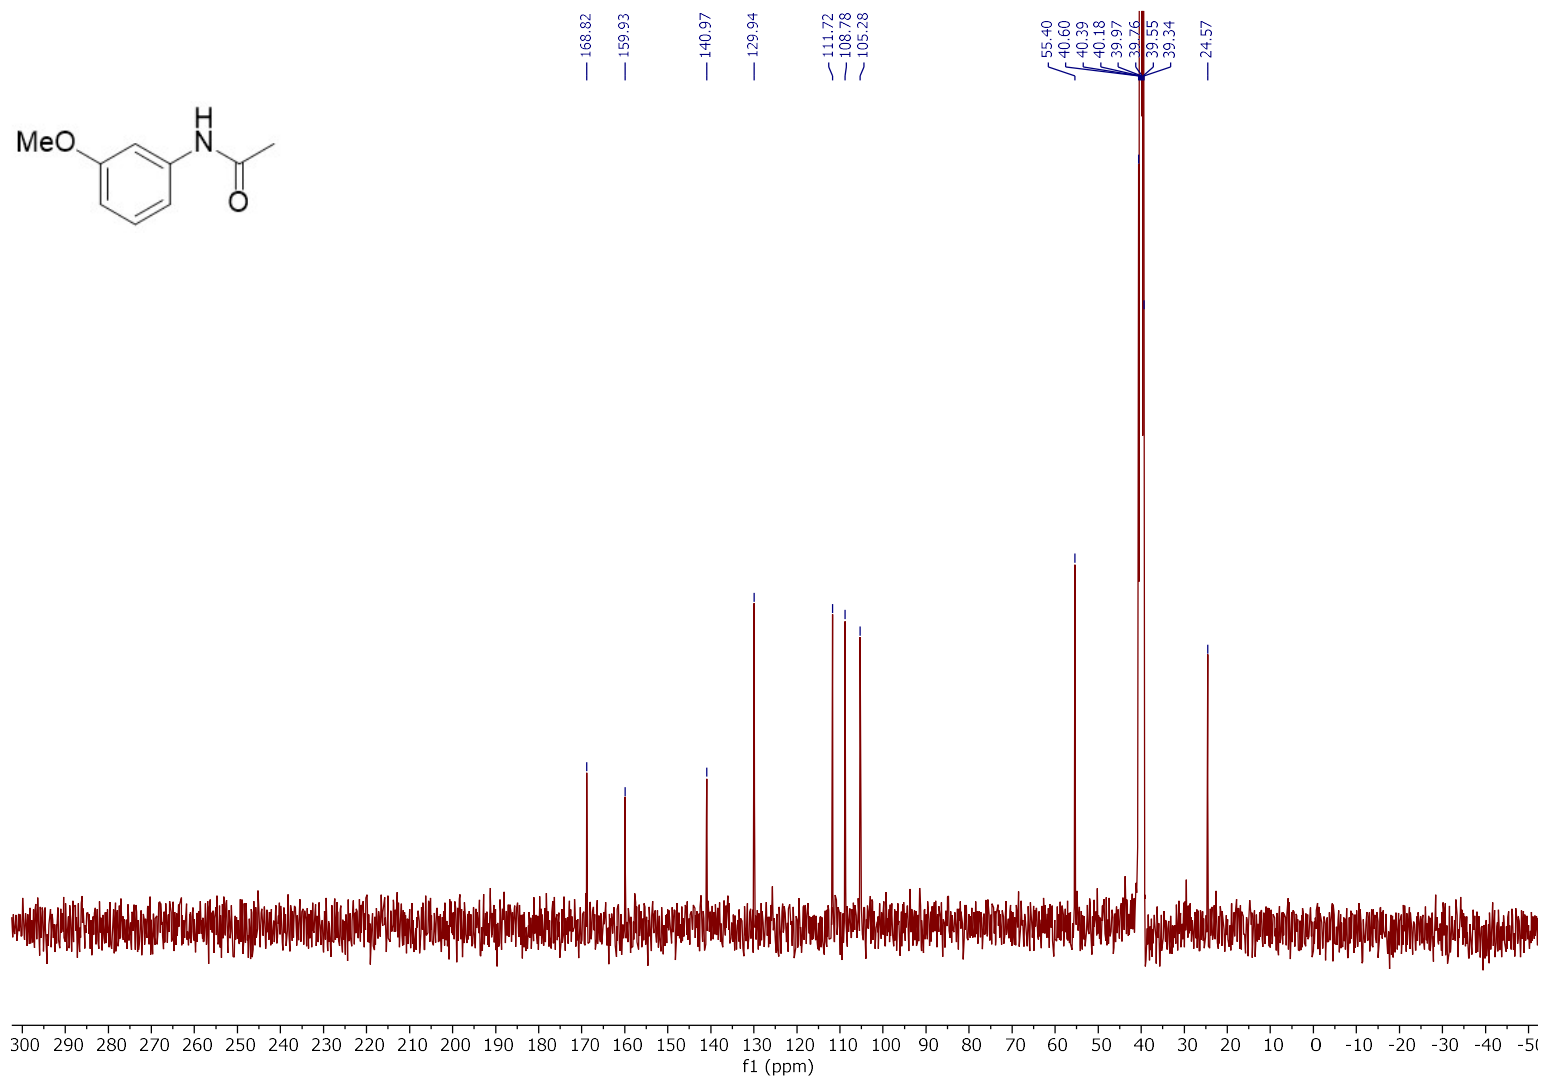

Figure S38: <sup>13</sup>C NMR Spectra of 3d

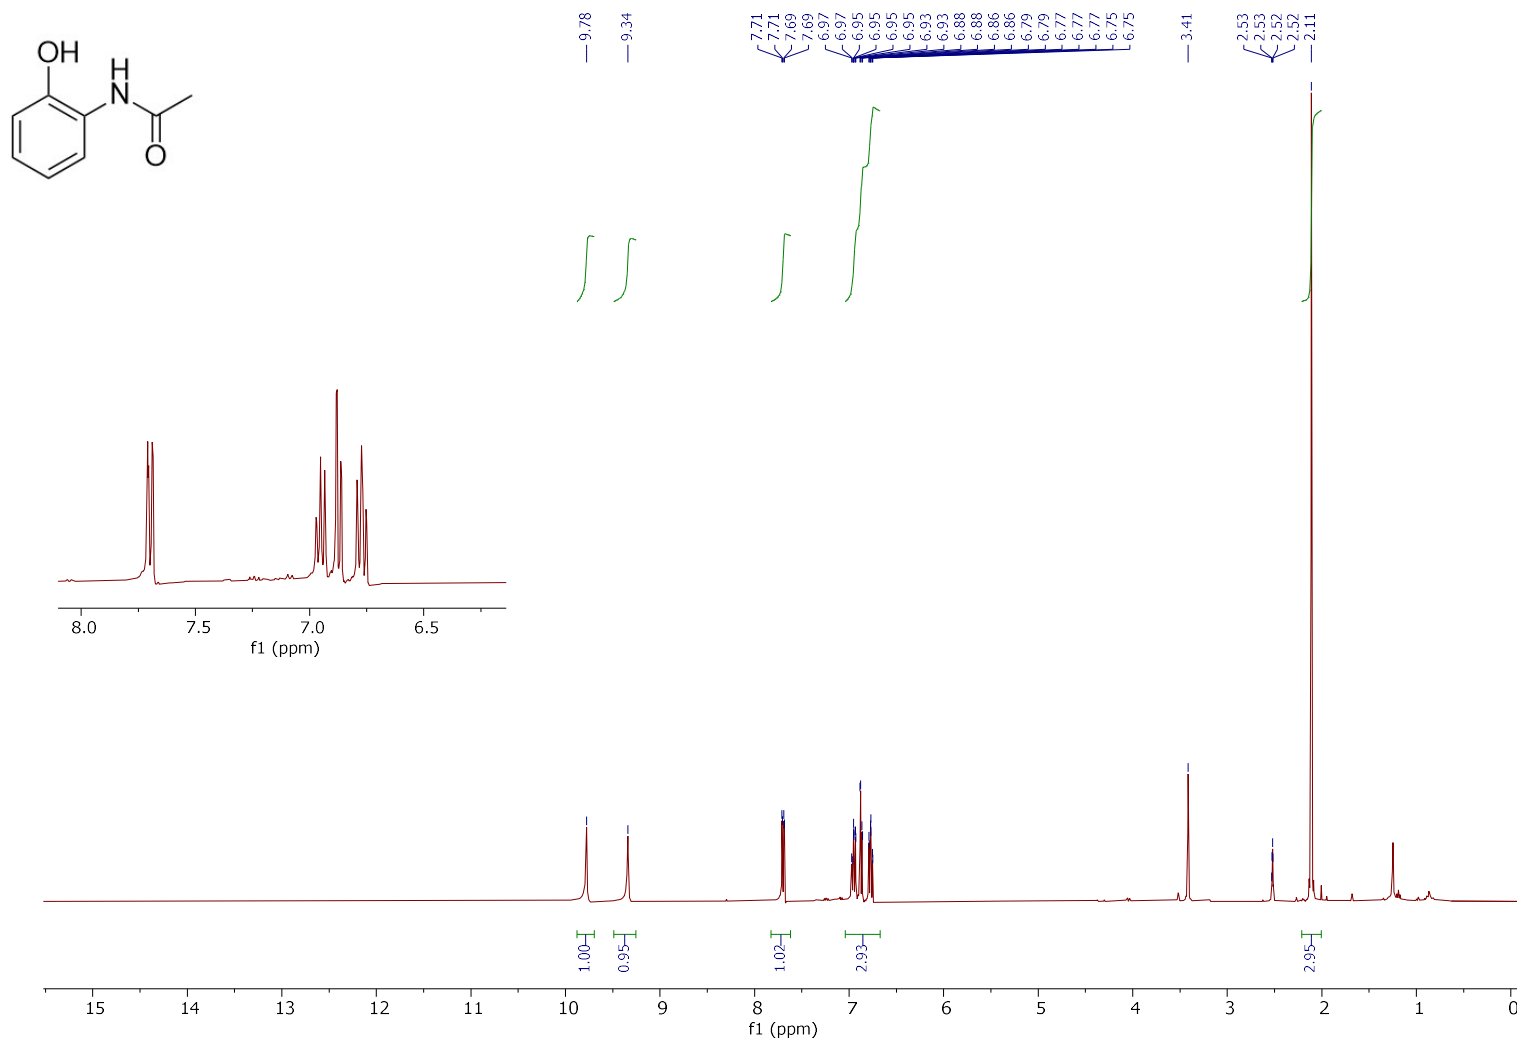

Figure S39: <sup>1</sup>H NMR Spectra of 3e

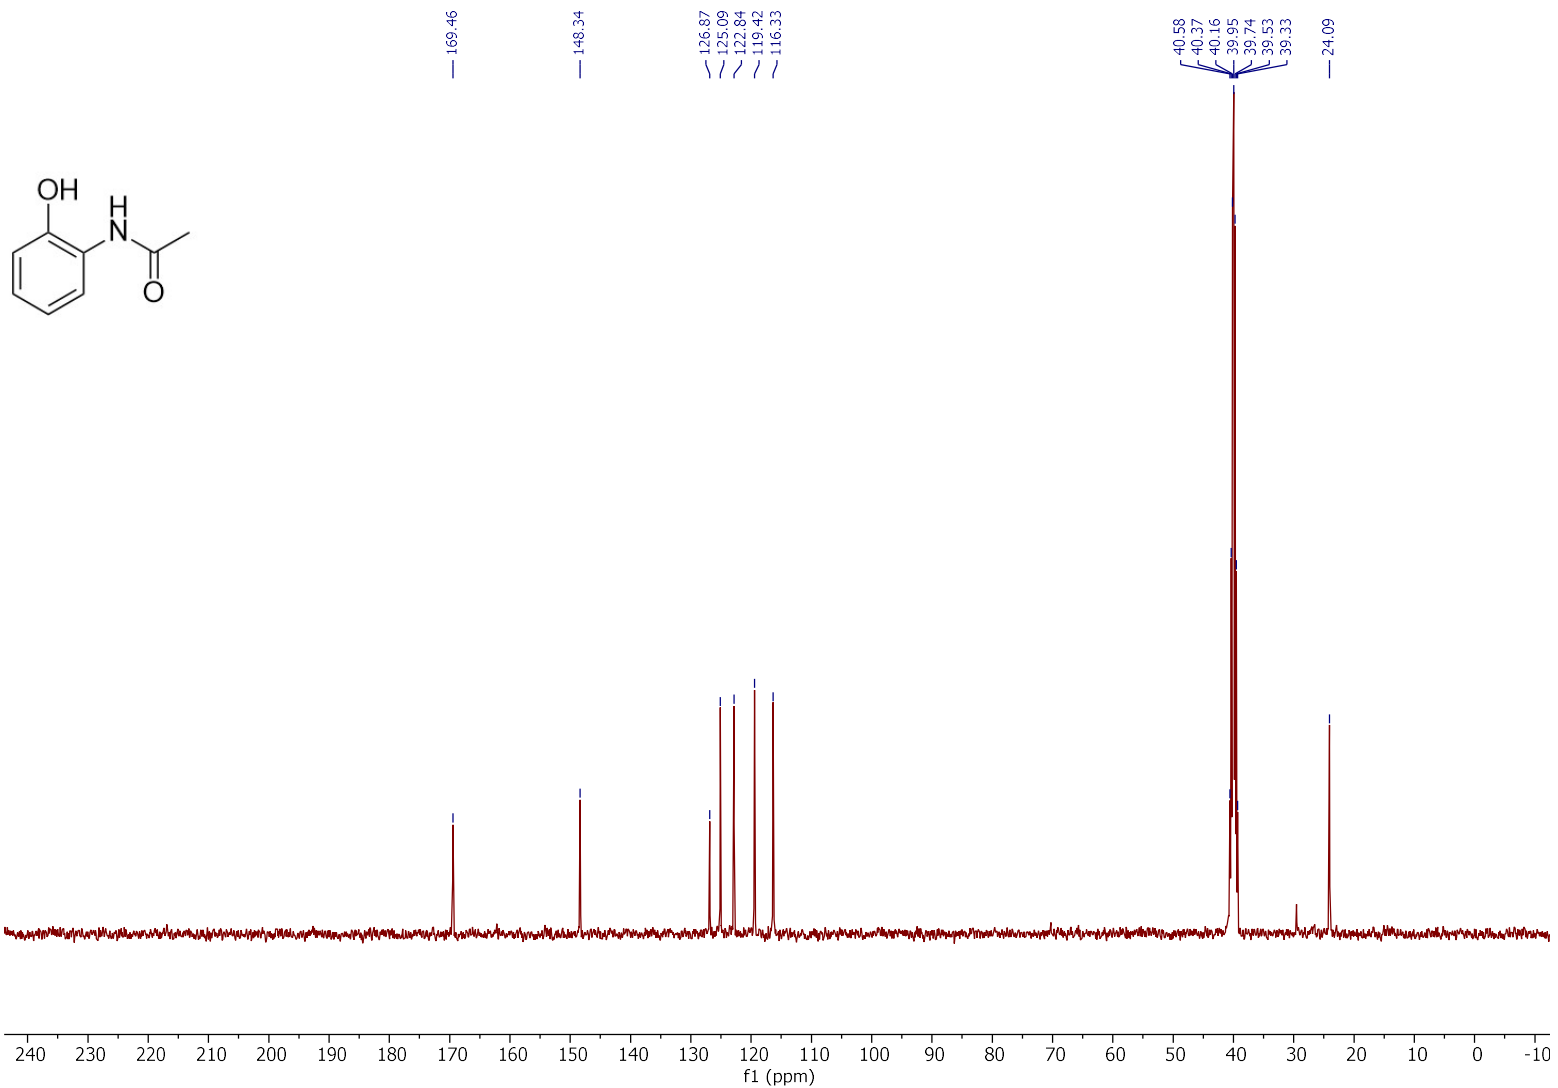

Figure S40: <sup>13</sup>C NMR Spectra of 3e

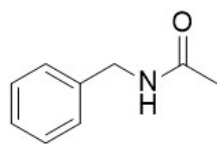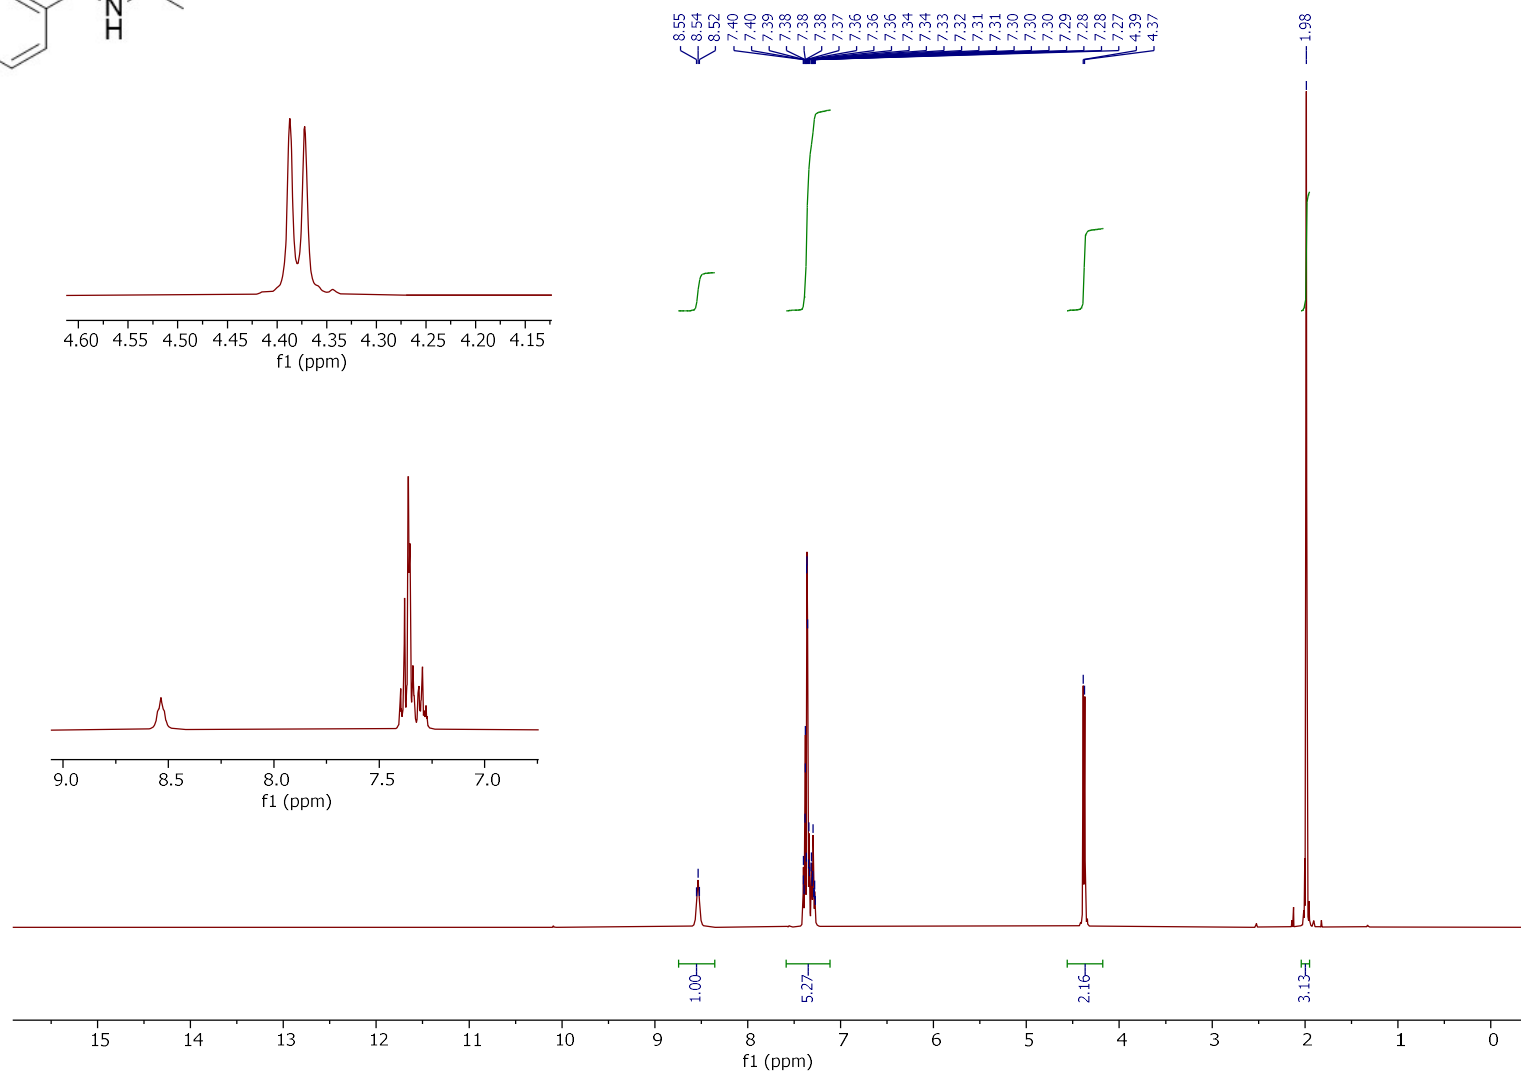

Figure S41: <sup>1</sup>H NMR Spectra of 3f

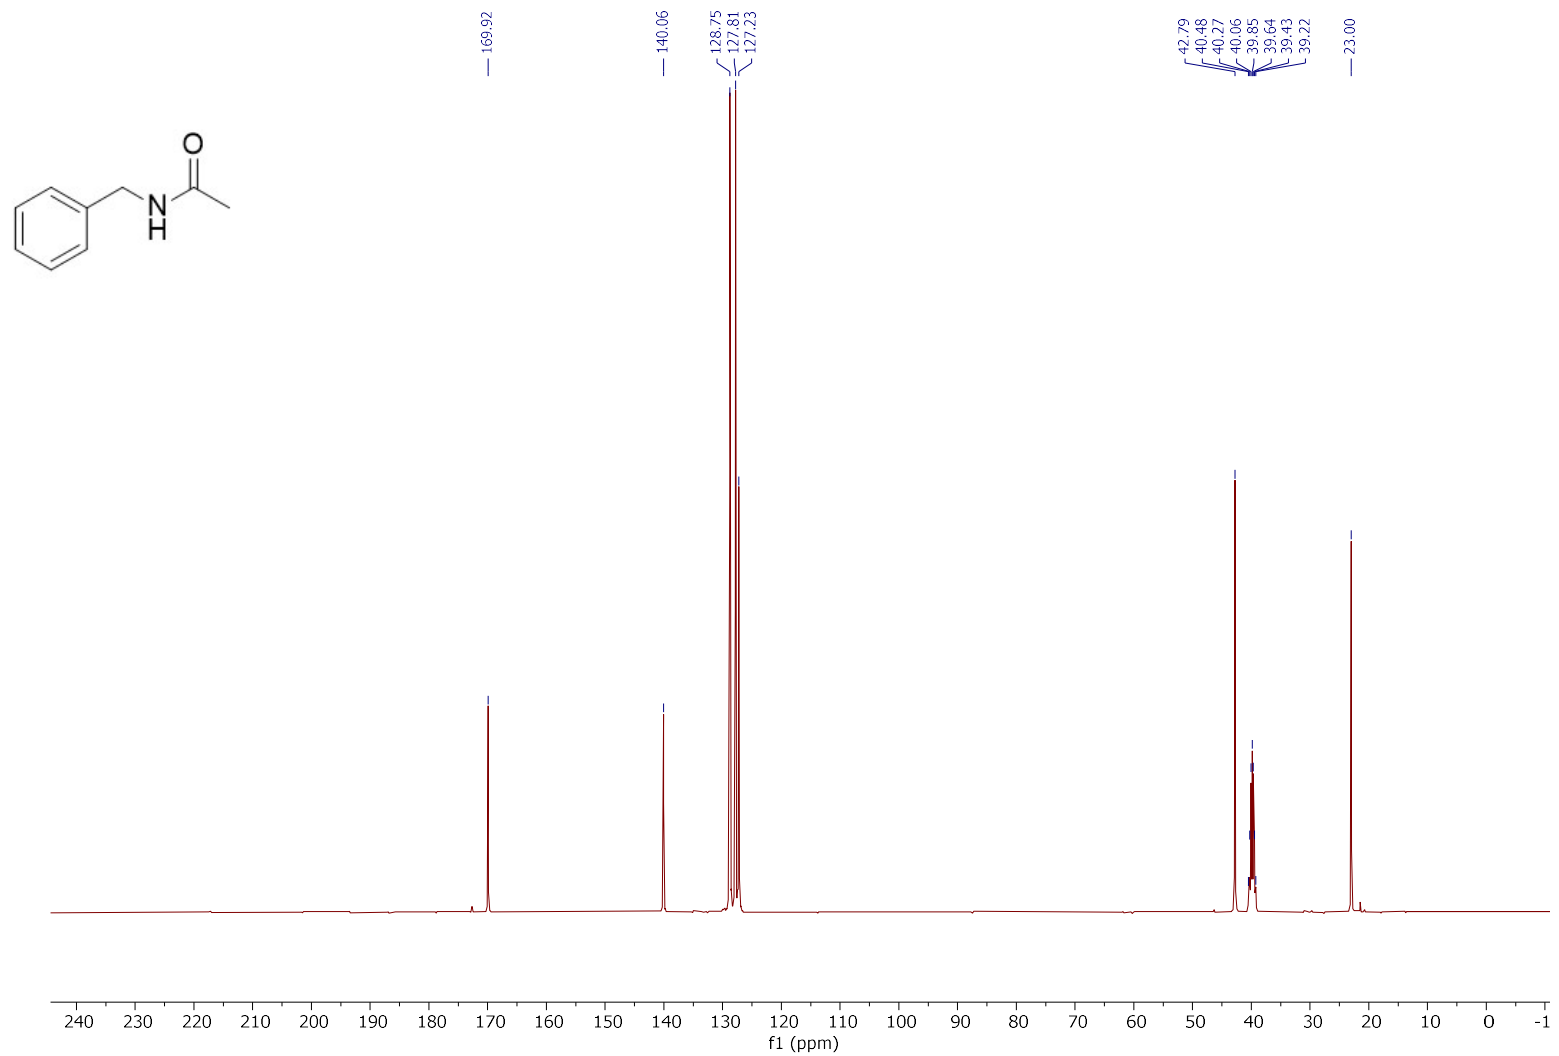

Figure S42:  $^{13}\text{C}$  NMR Spectra of 3f



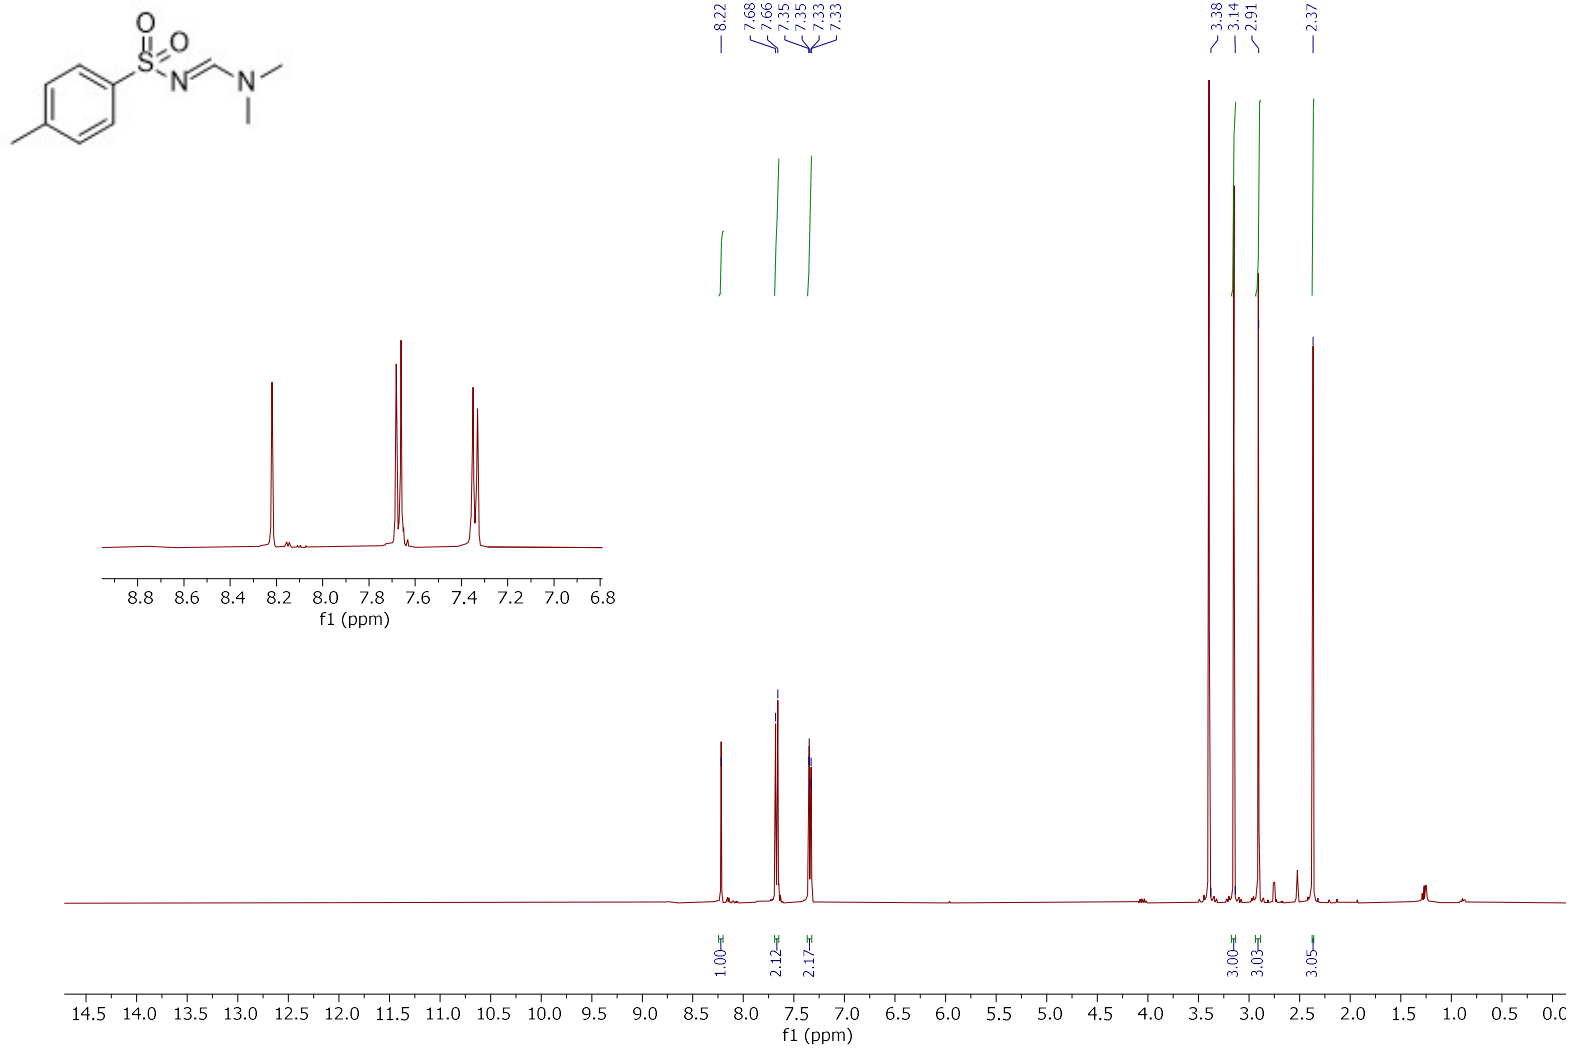

Figure S43: <sup>1</sup>H NMR Spectra of 5a

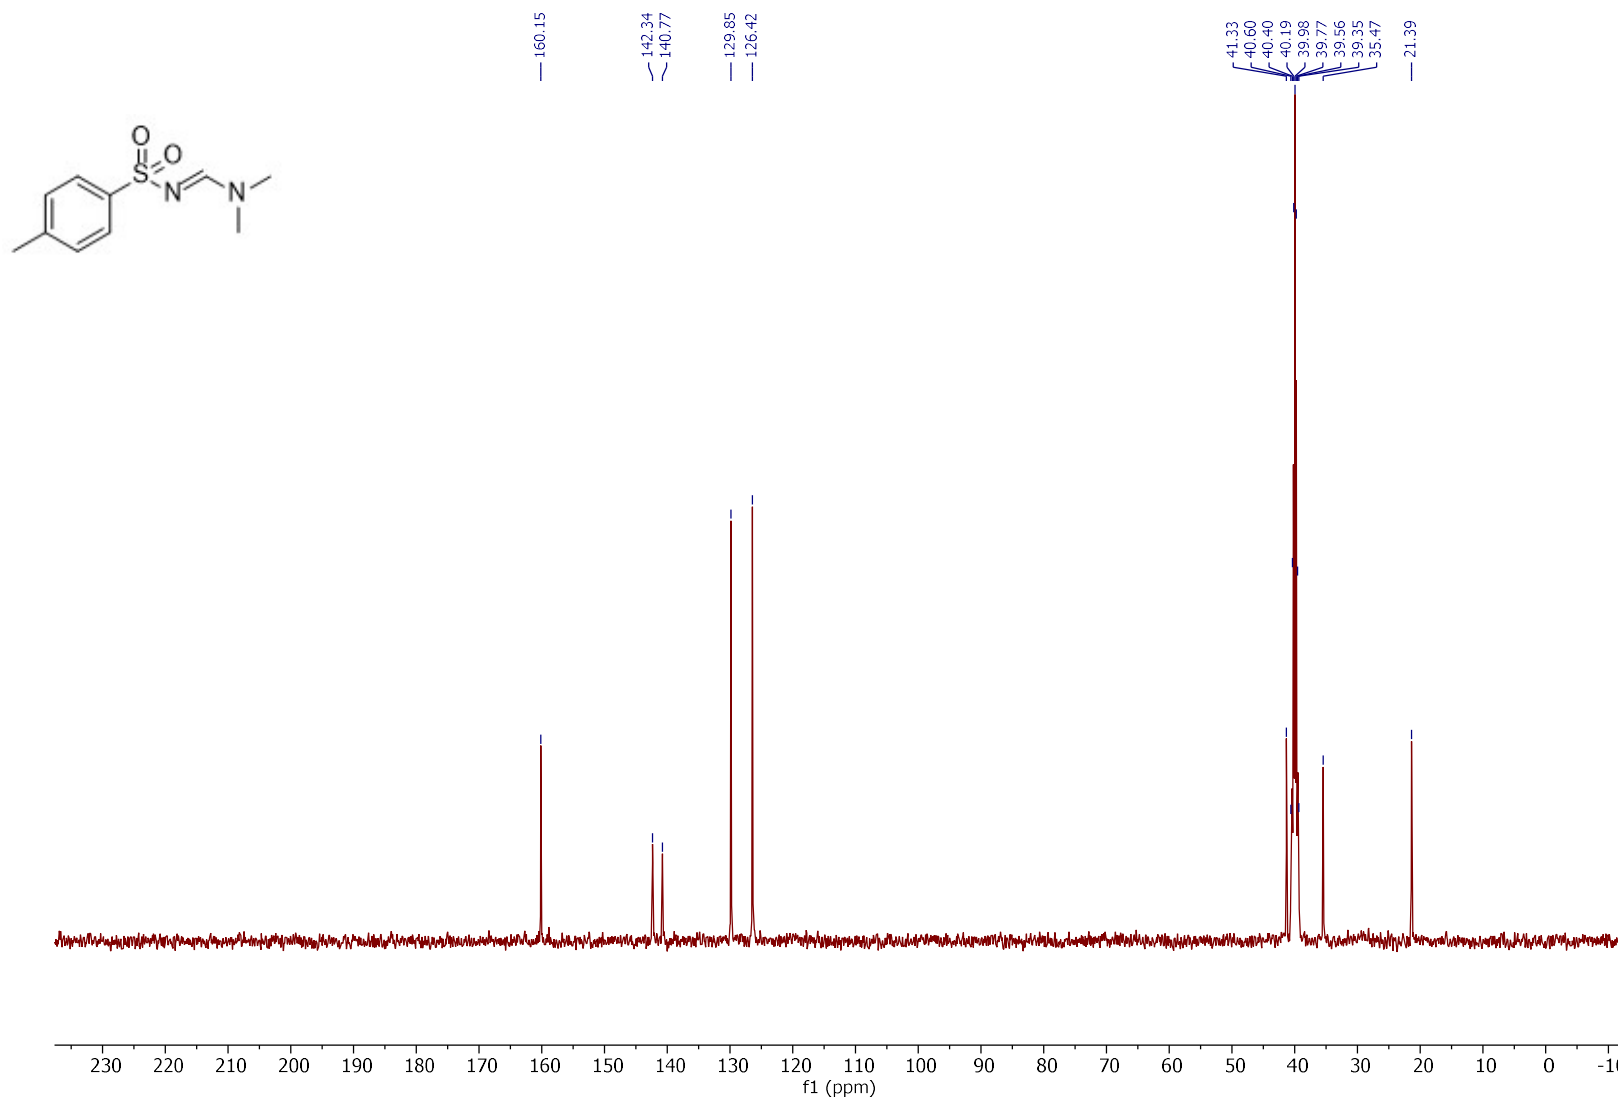

Figure S44:  $^{13}\text{C}$  NMR Spectra of 5a

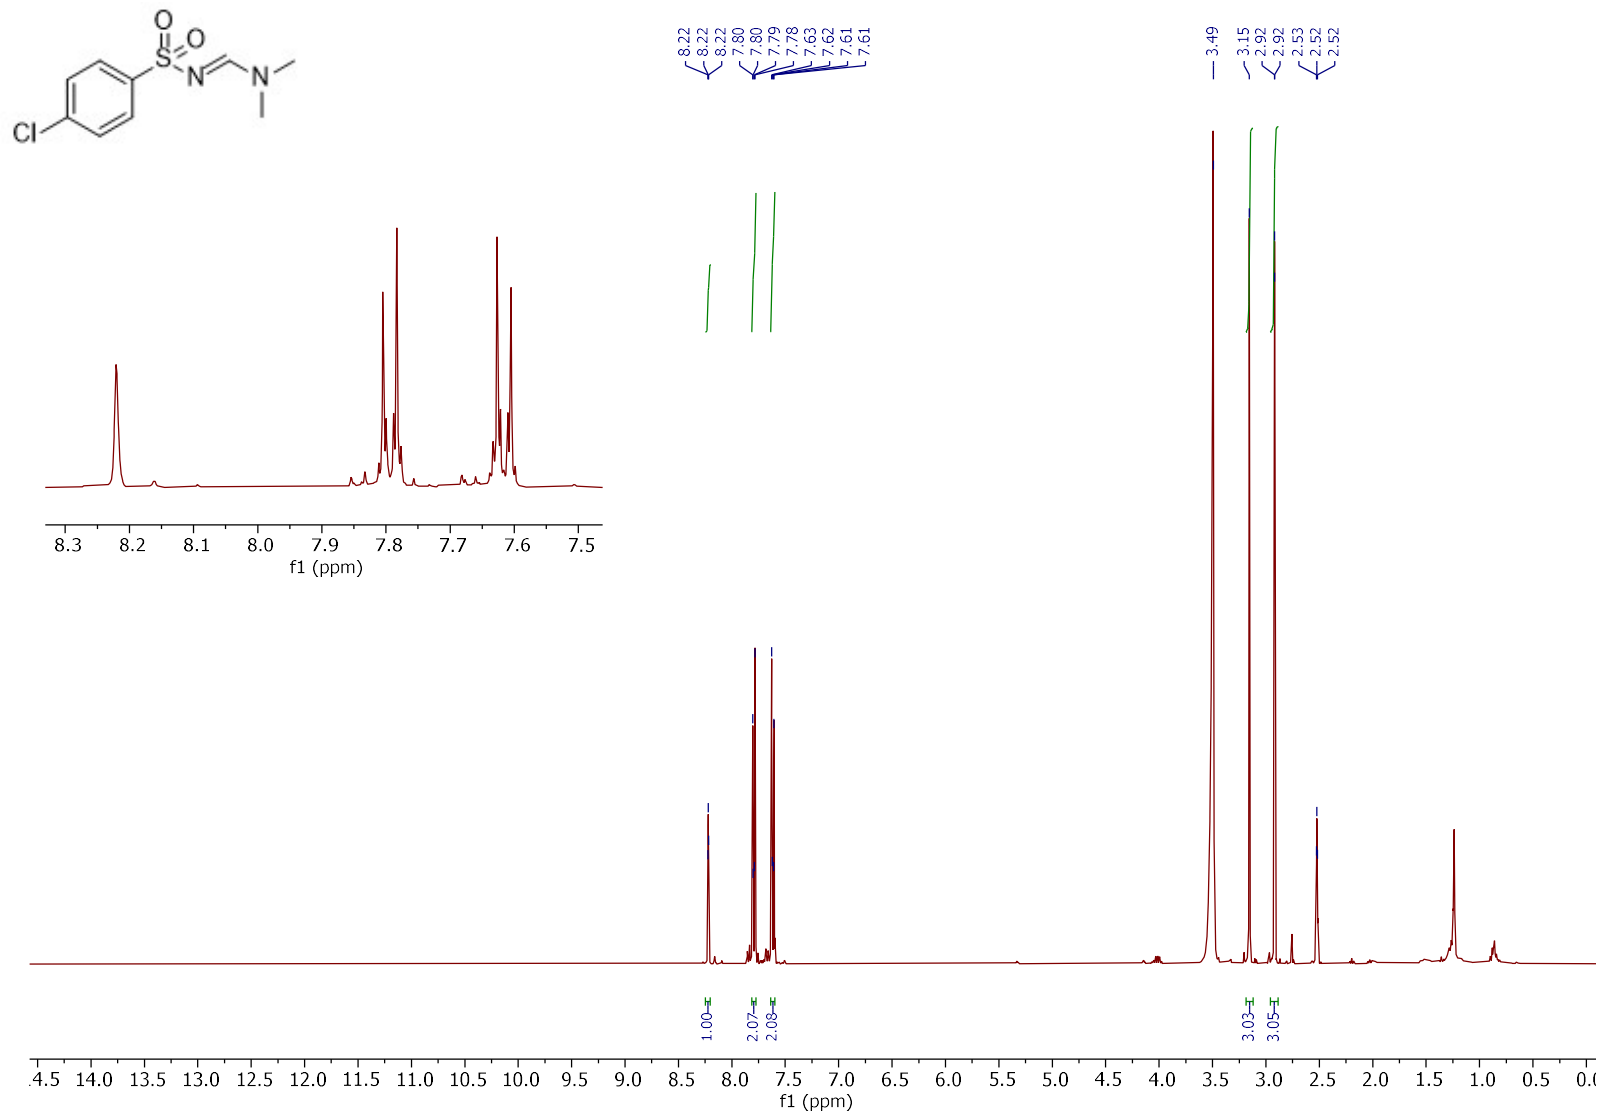

Figure S45:  $^1\text{H}$  NMR Spectra of 5b

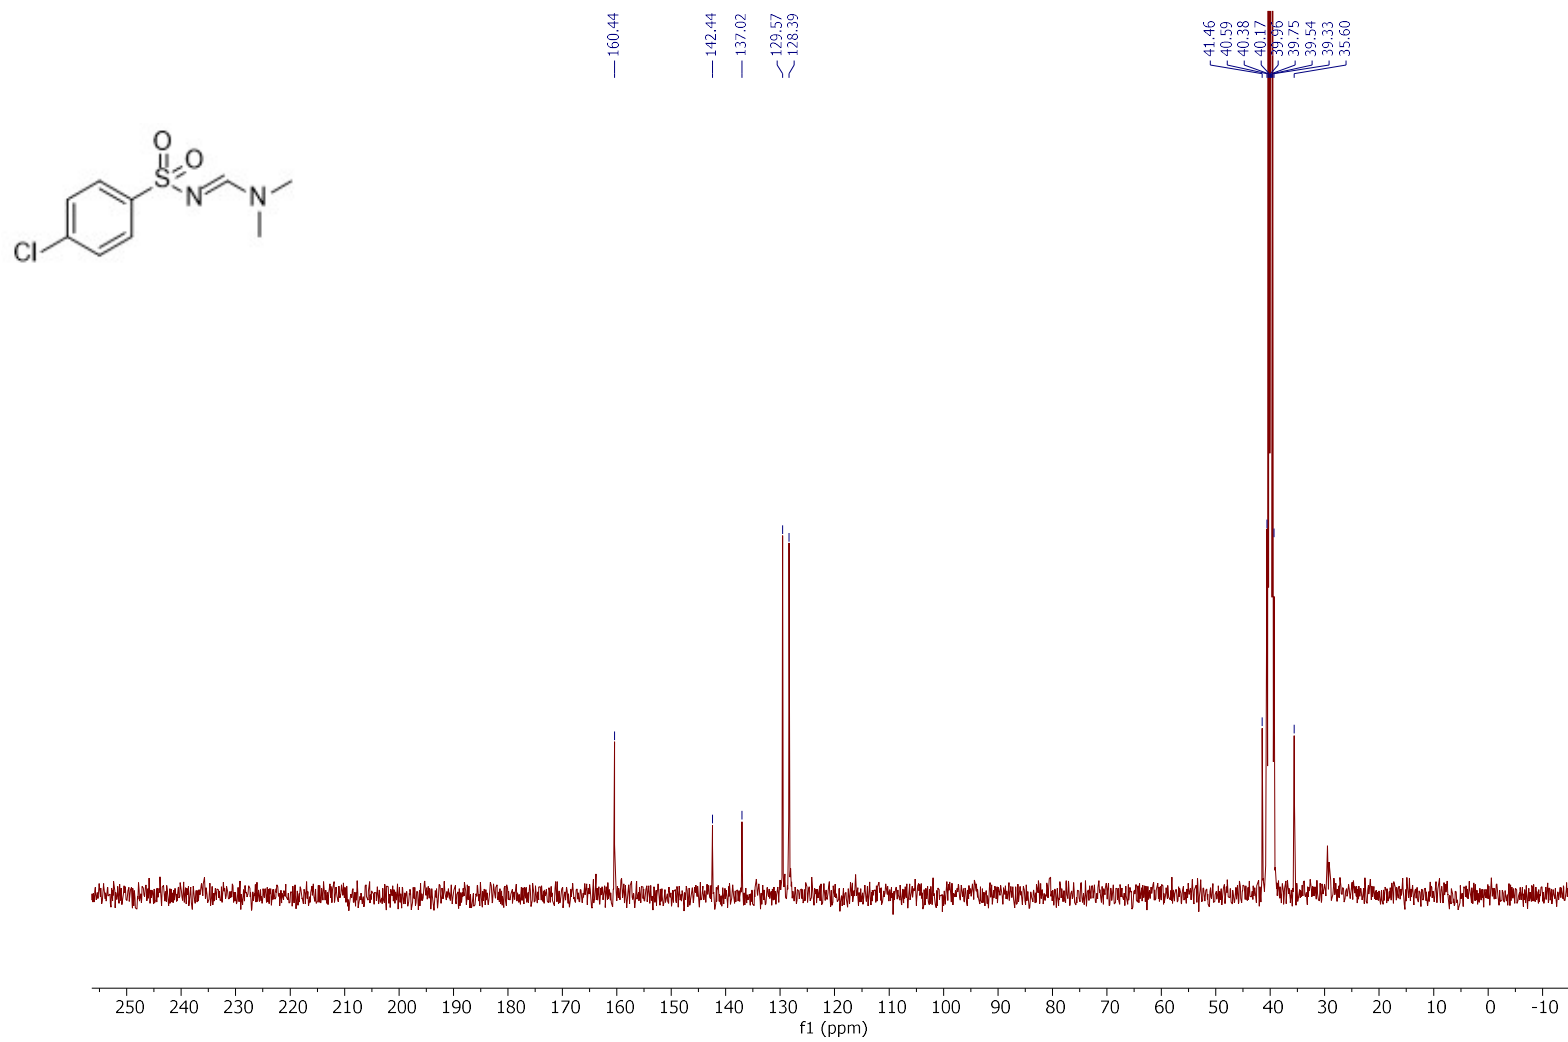

Figure S46:  $^{13}\text{C}$  NMR Spectra of 5b

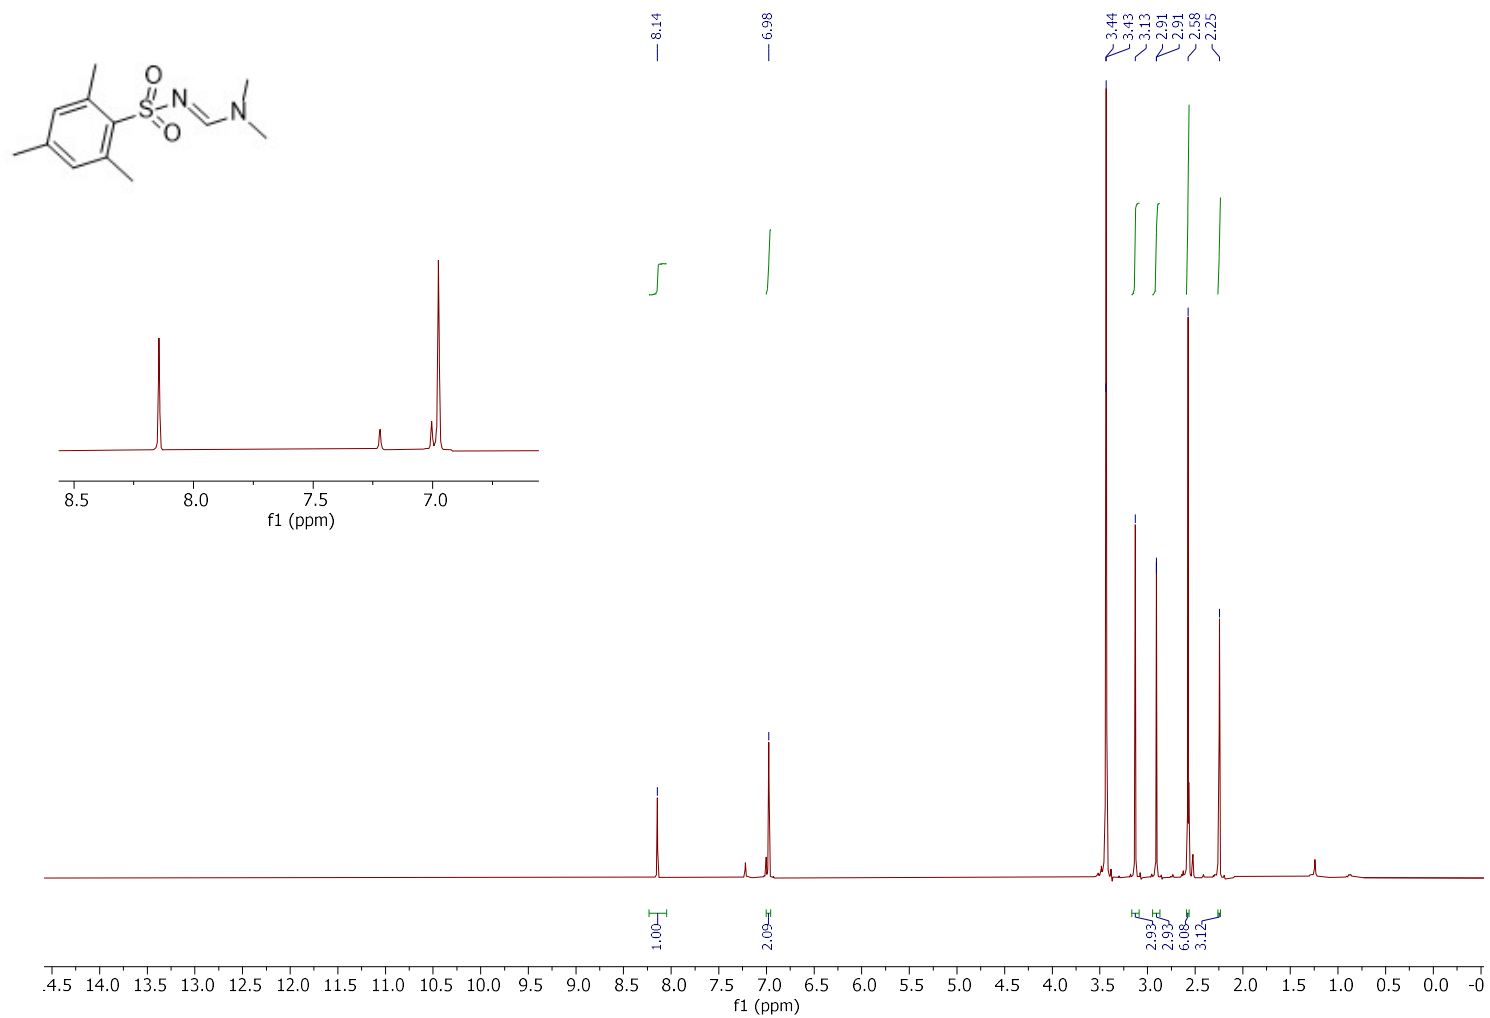

Figure S47: <sup>1</sup>H NMR Spectra of 5c

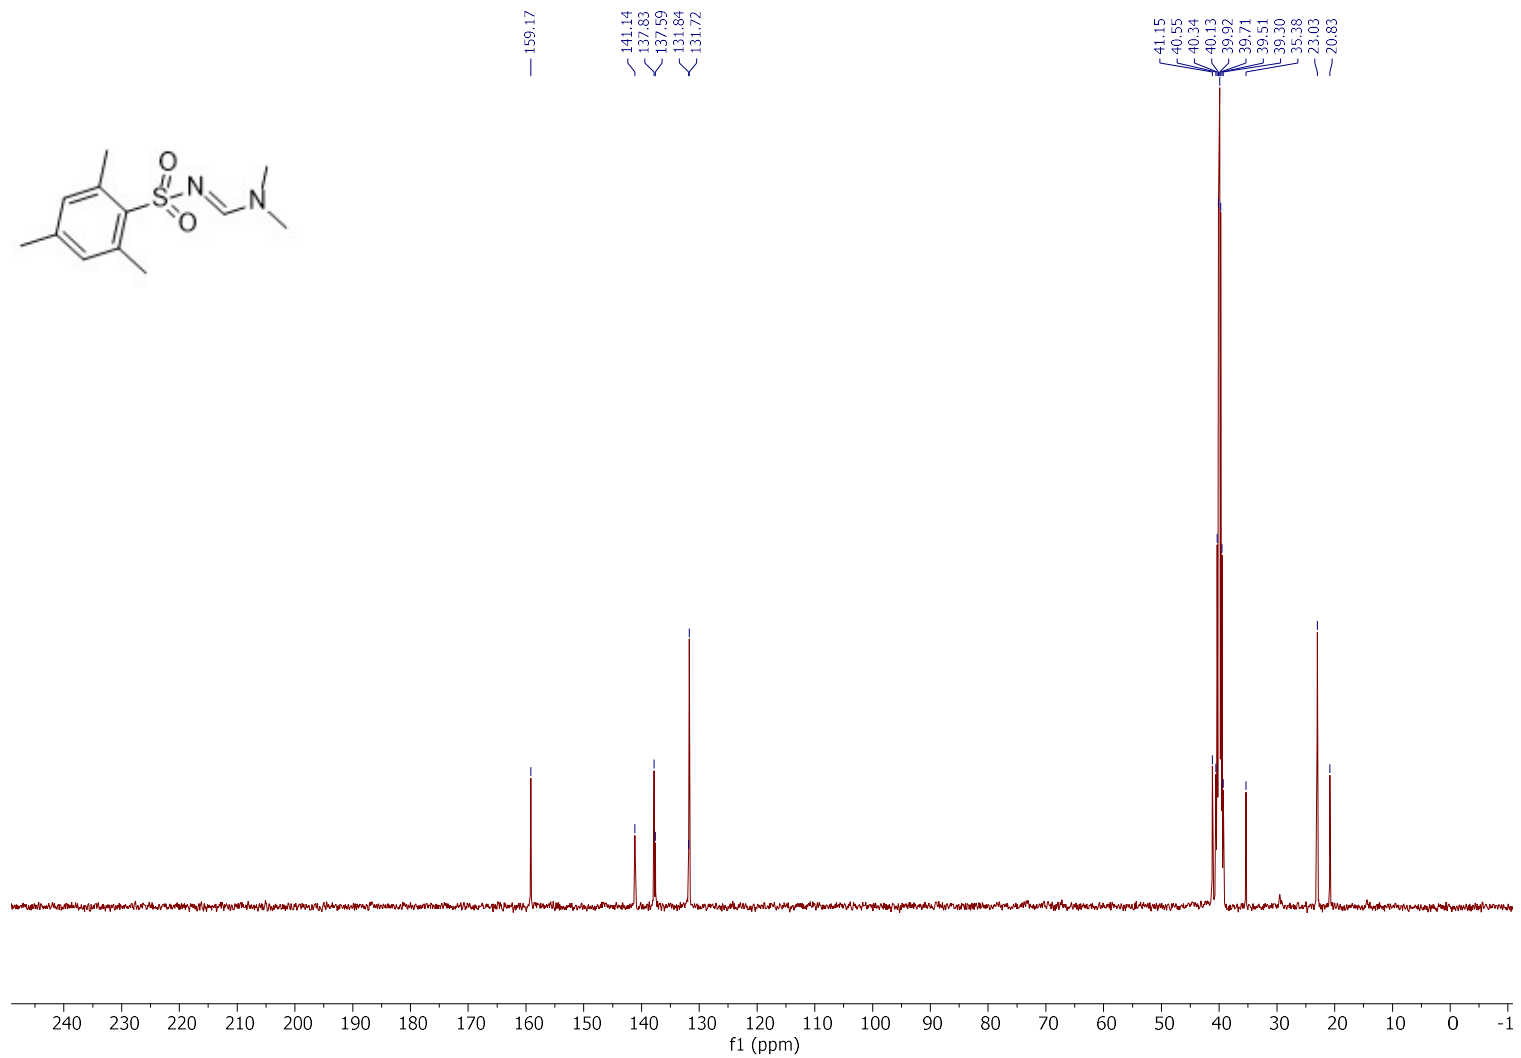

Figure S48:  $^{13}\text{C}$  NMR Spectra of 5c

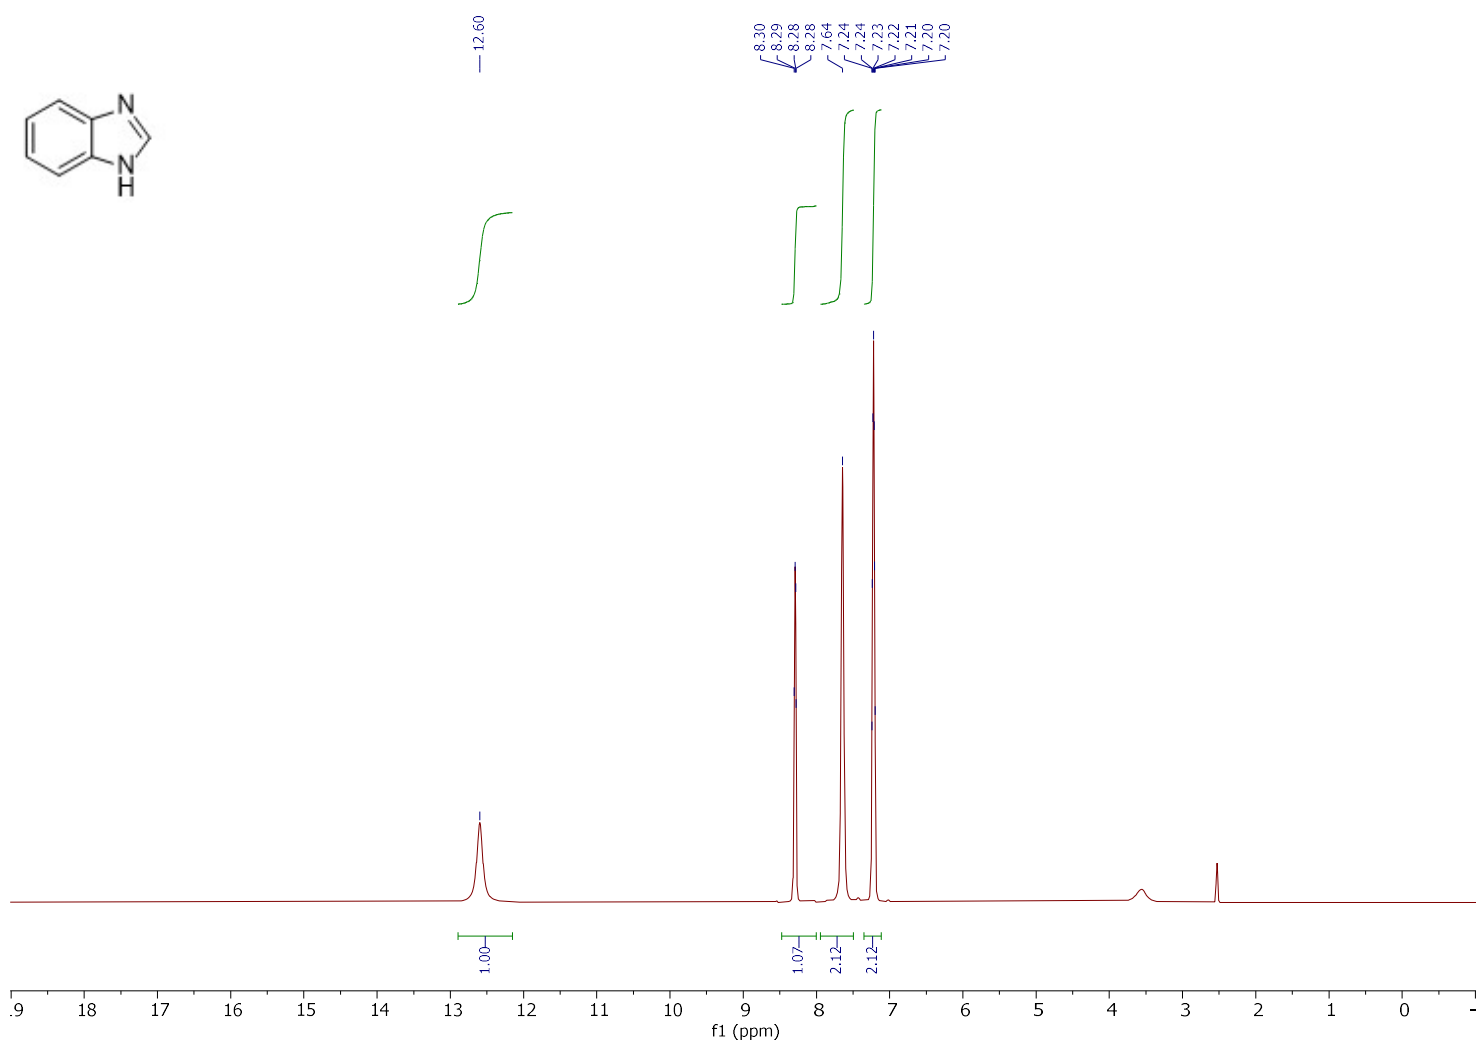

Figure S49: <sup>1</sup>H NMR Spectra of 7a

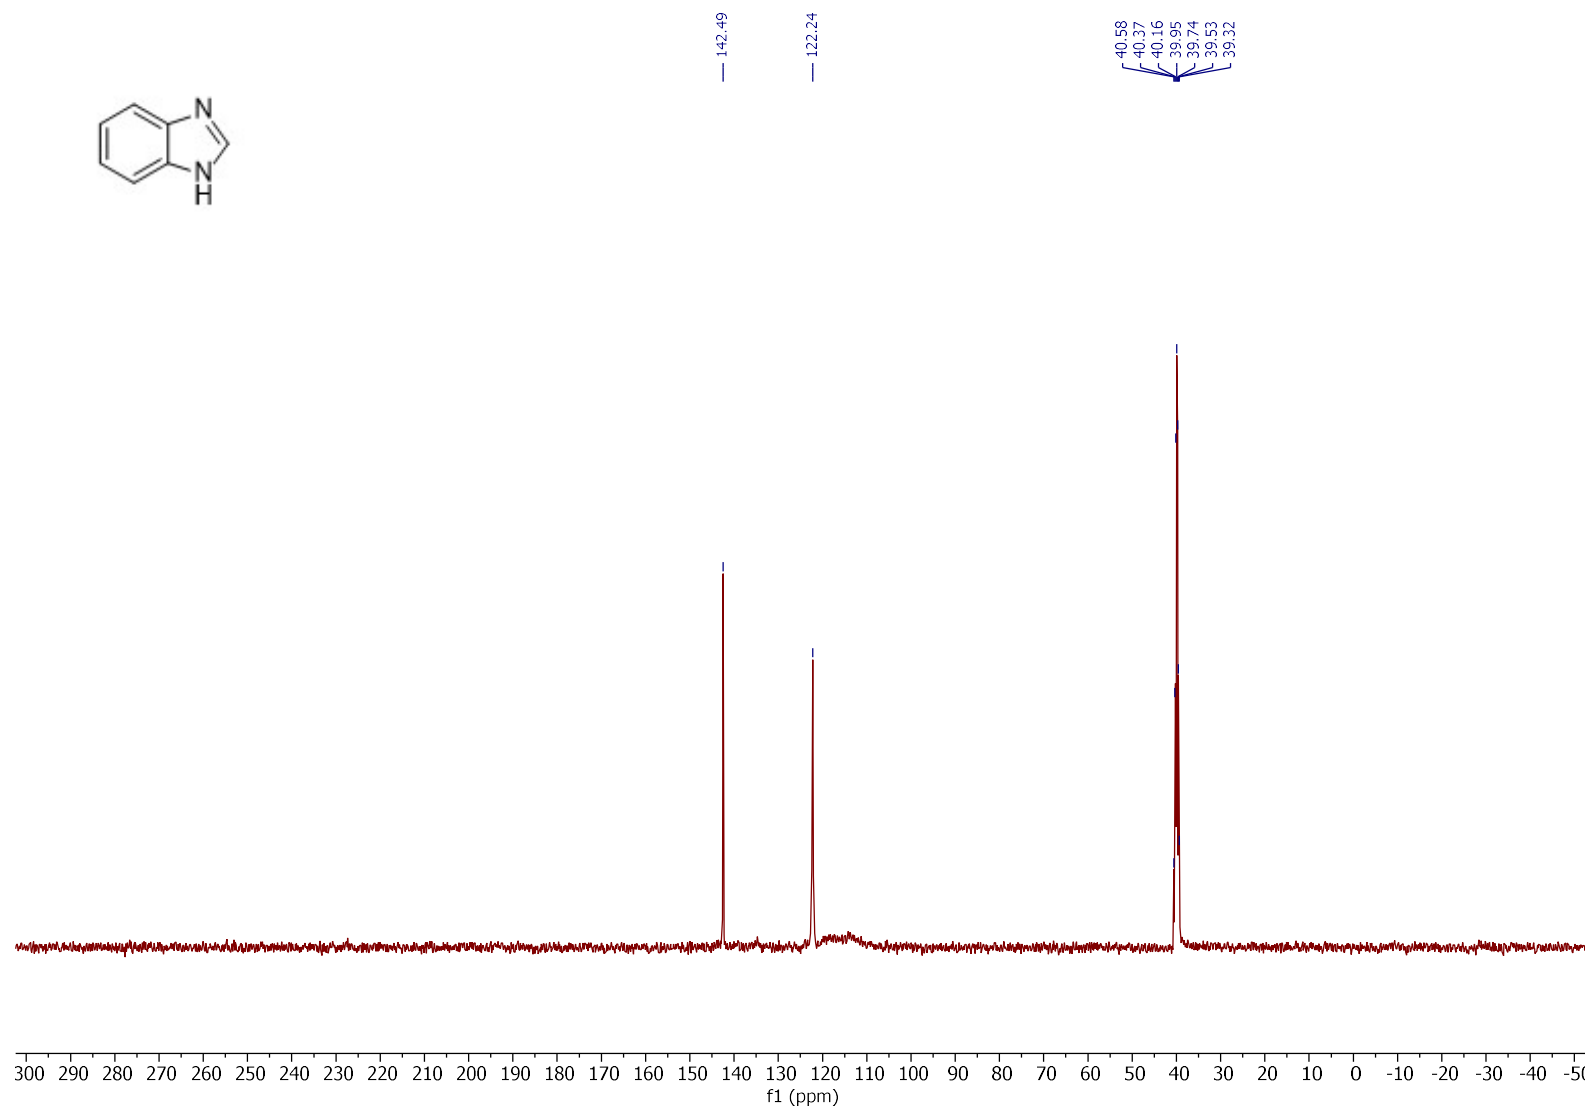

Figure S50: <sup>13</sup>C NMR Spectra of 7a



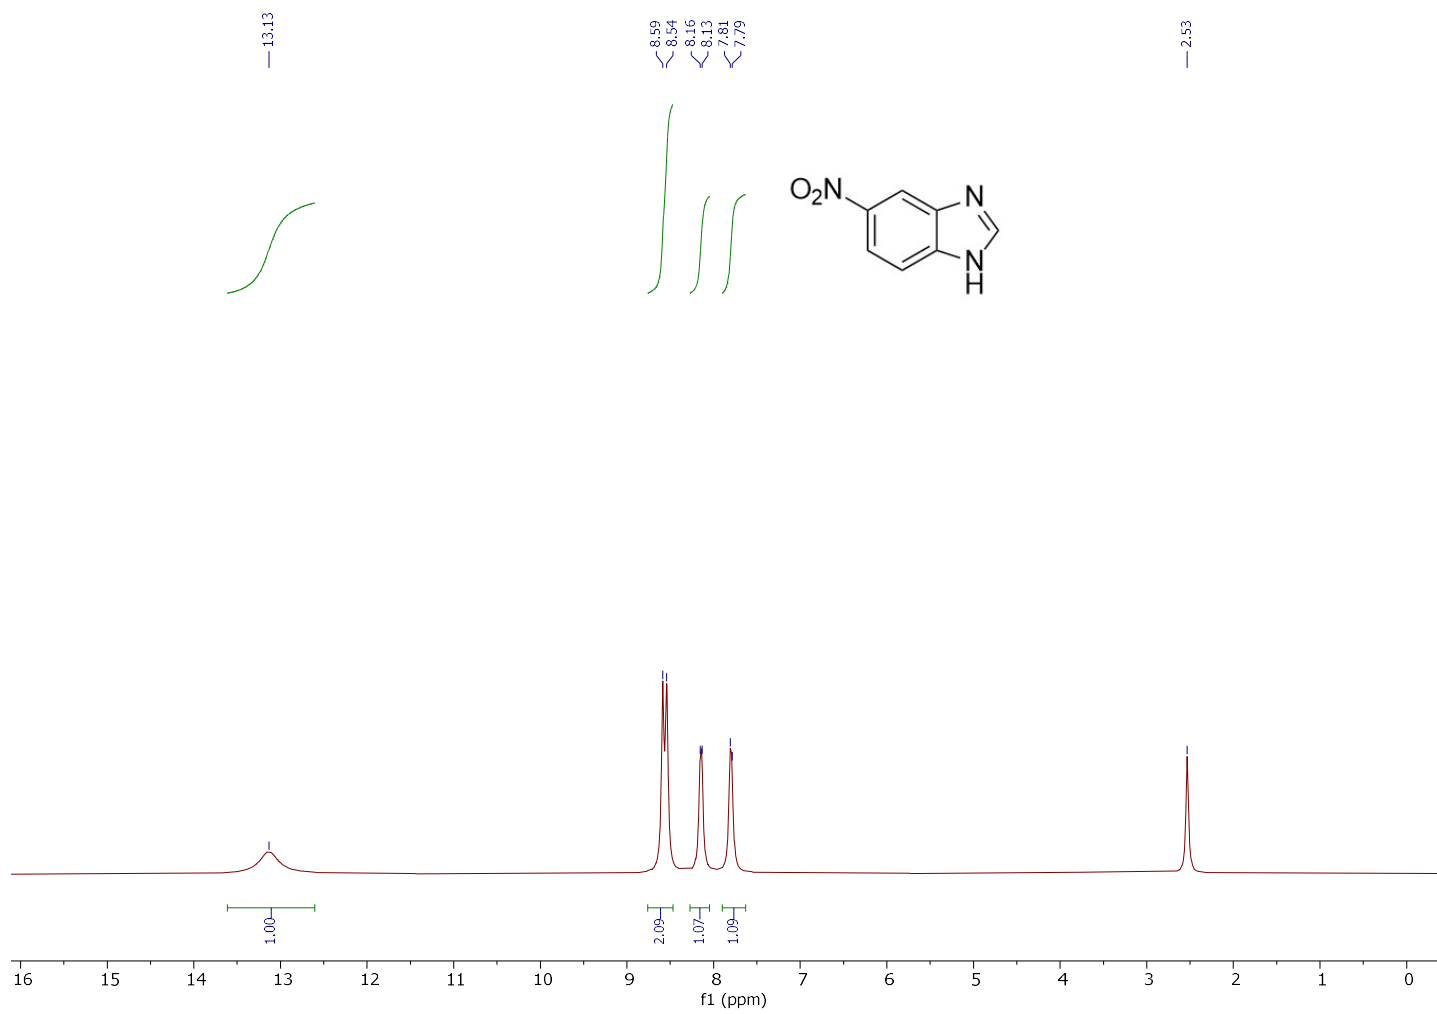

Figure S51: <sup>1</sup>H NMR Spectra of 7b

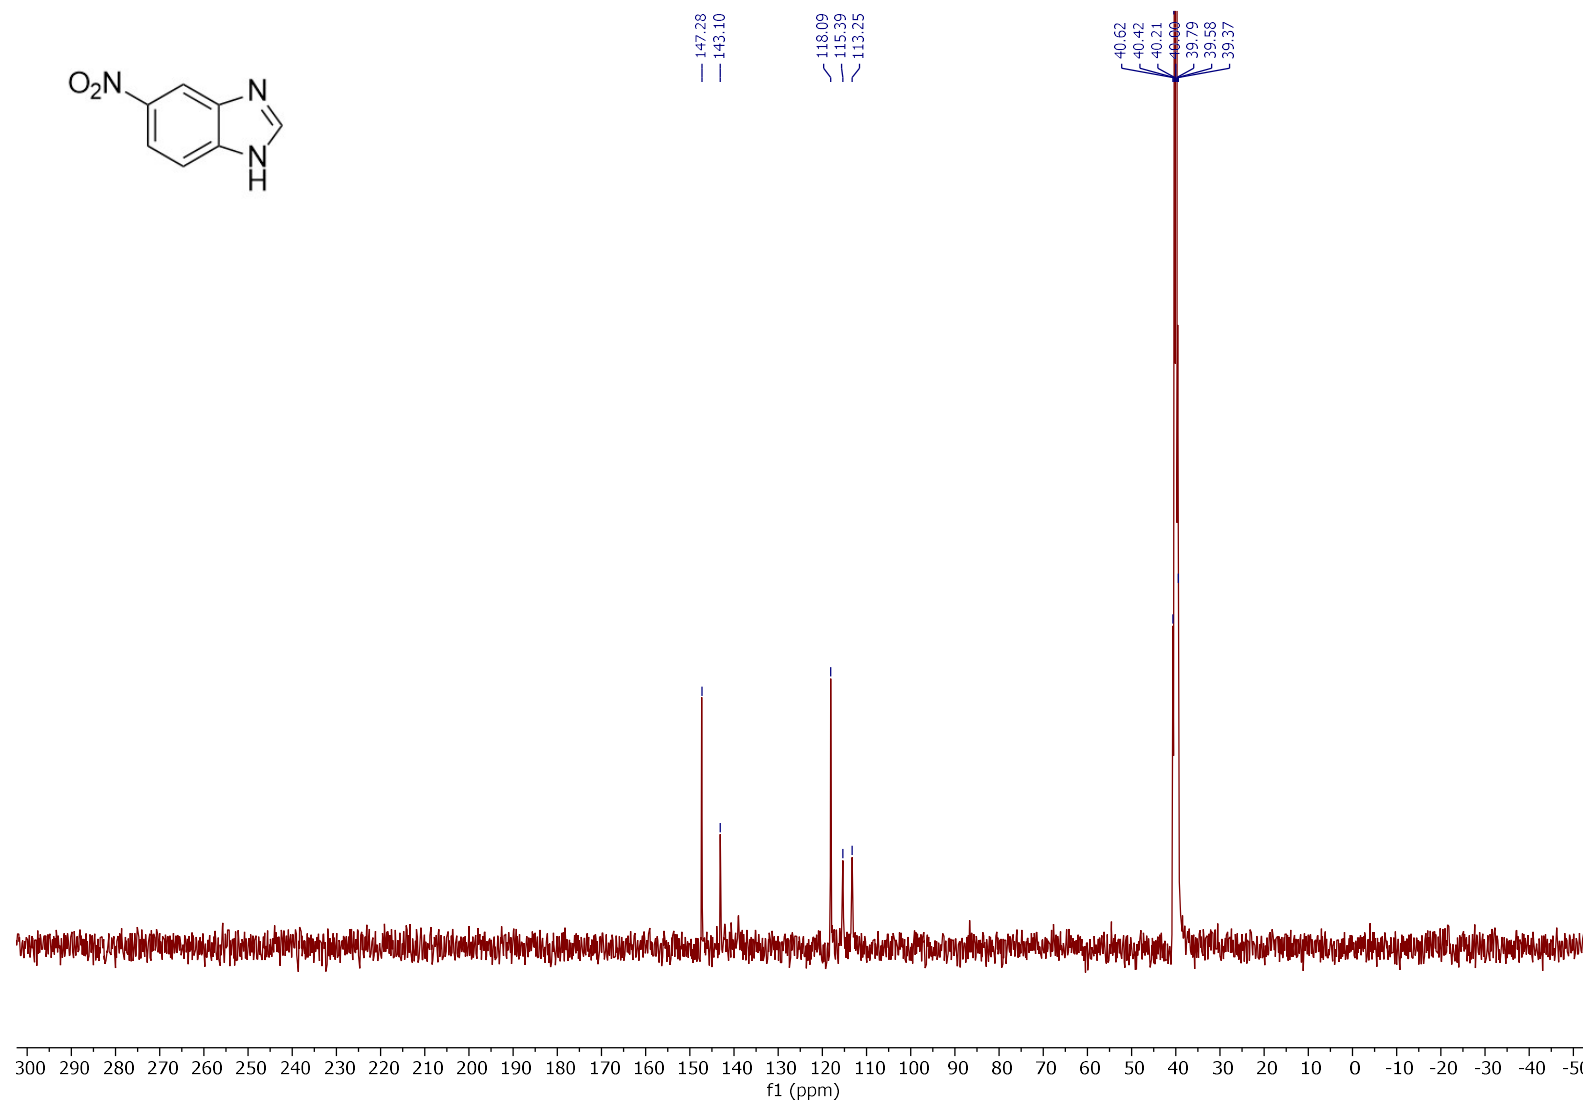

Figure S52: <sup>13</sup>C NMR Spectra of 7b

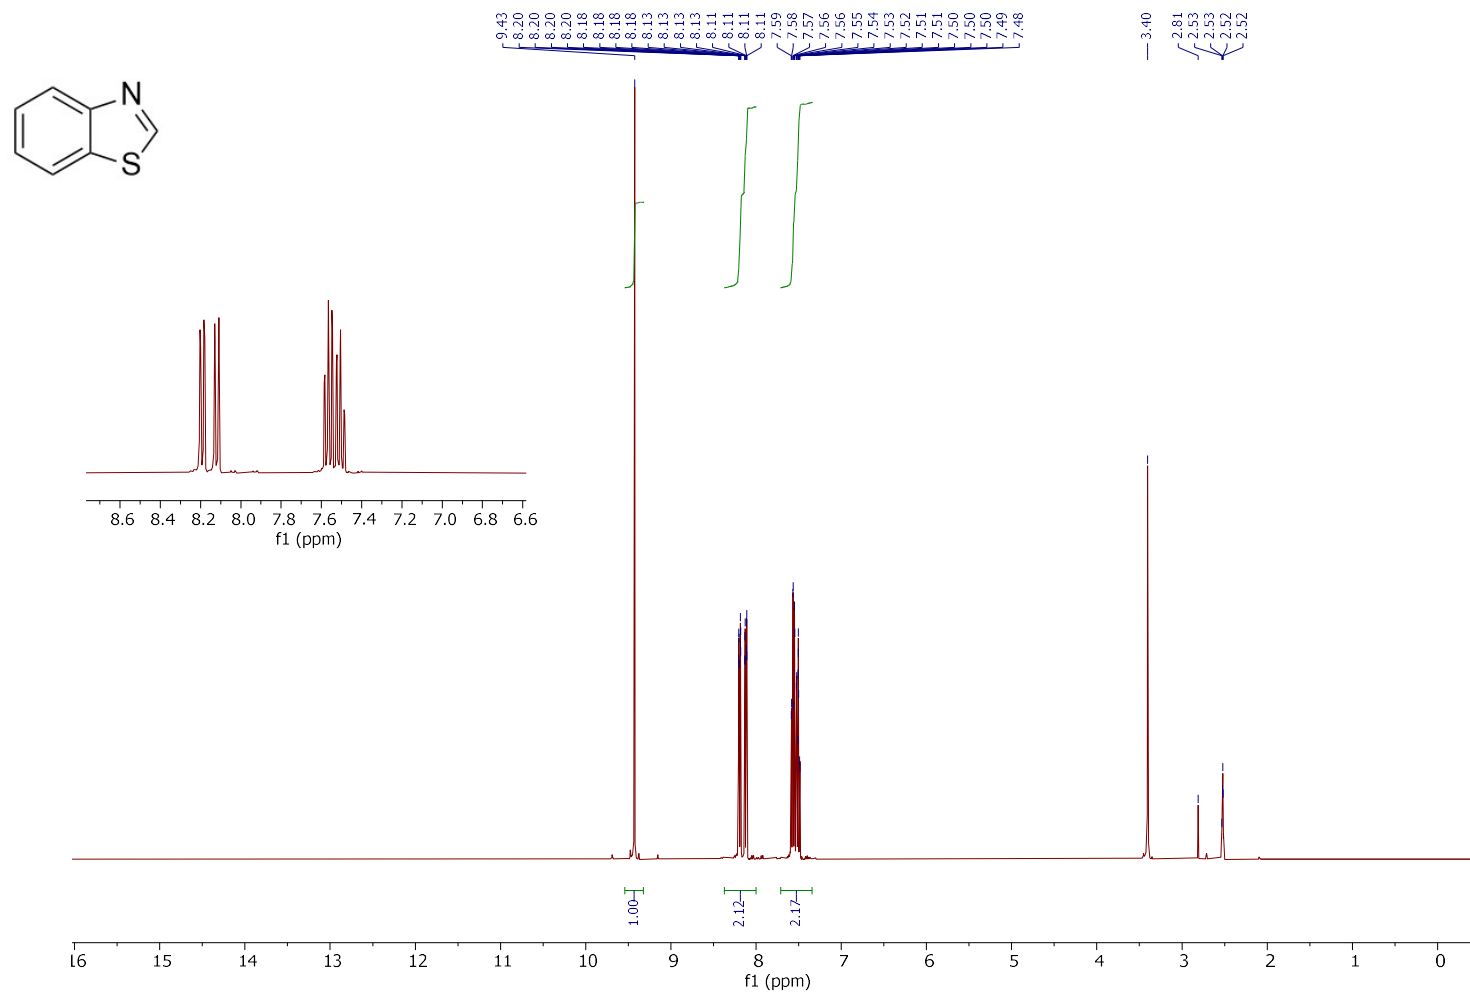

Figure S53: <sup>1</sup>H NMR Spectra of 8

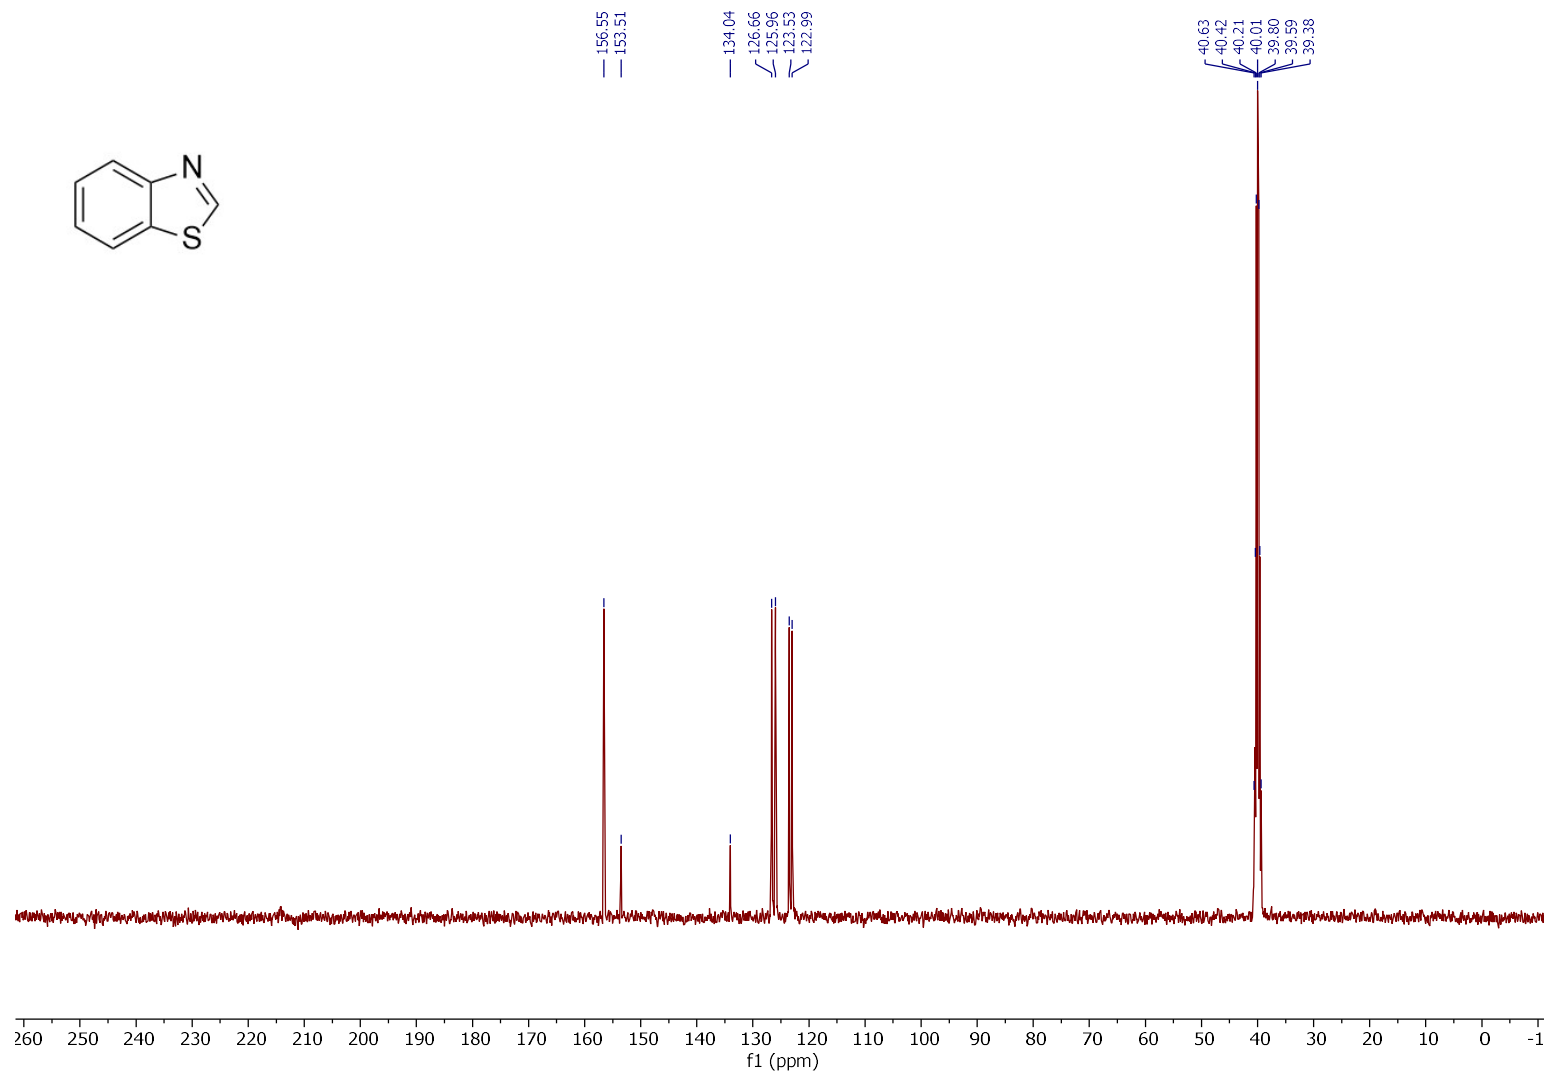

Figure S54:  $^{13}\text{C}$  NMR Spectra of 8

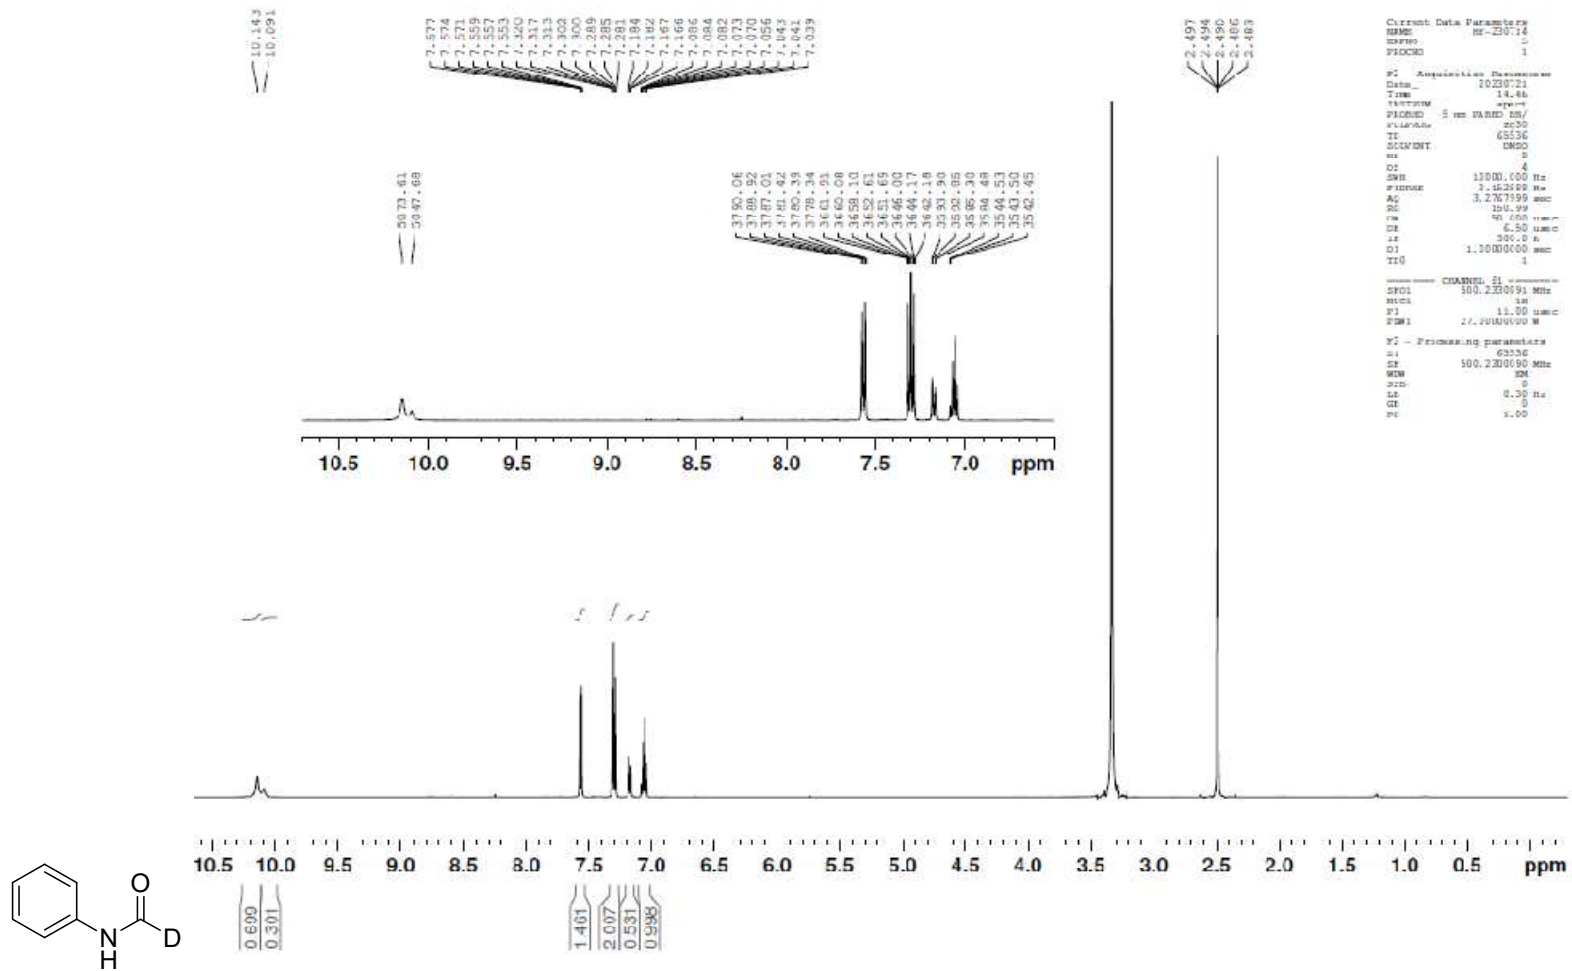

Figure S56: <sup>1</sup>H NMR Spectra of 2a-d1

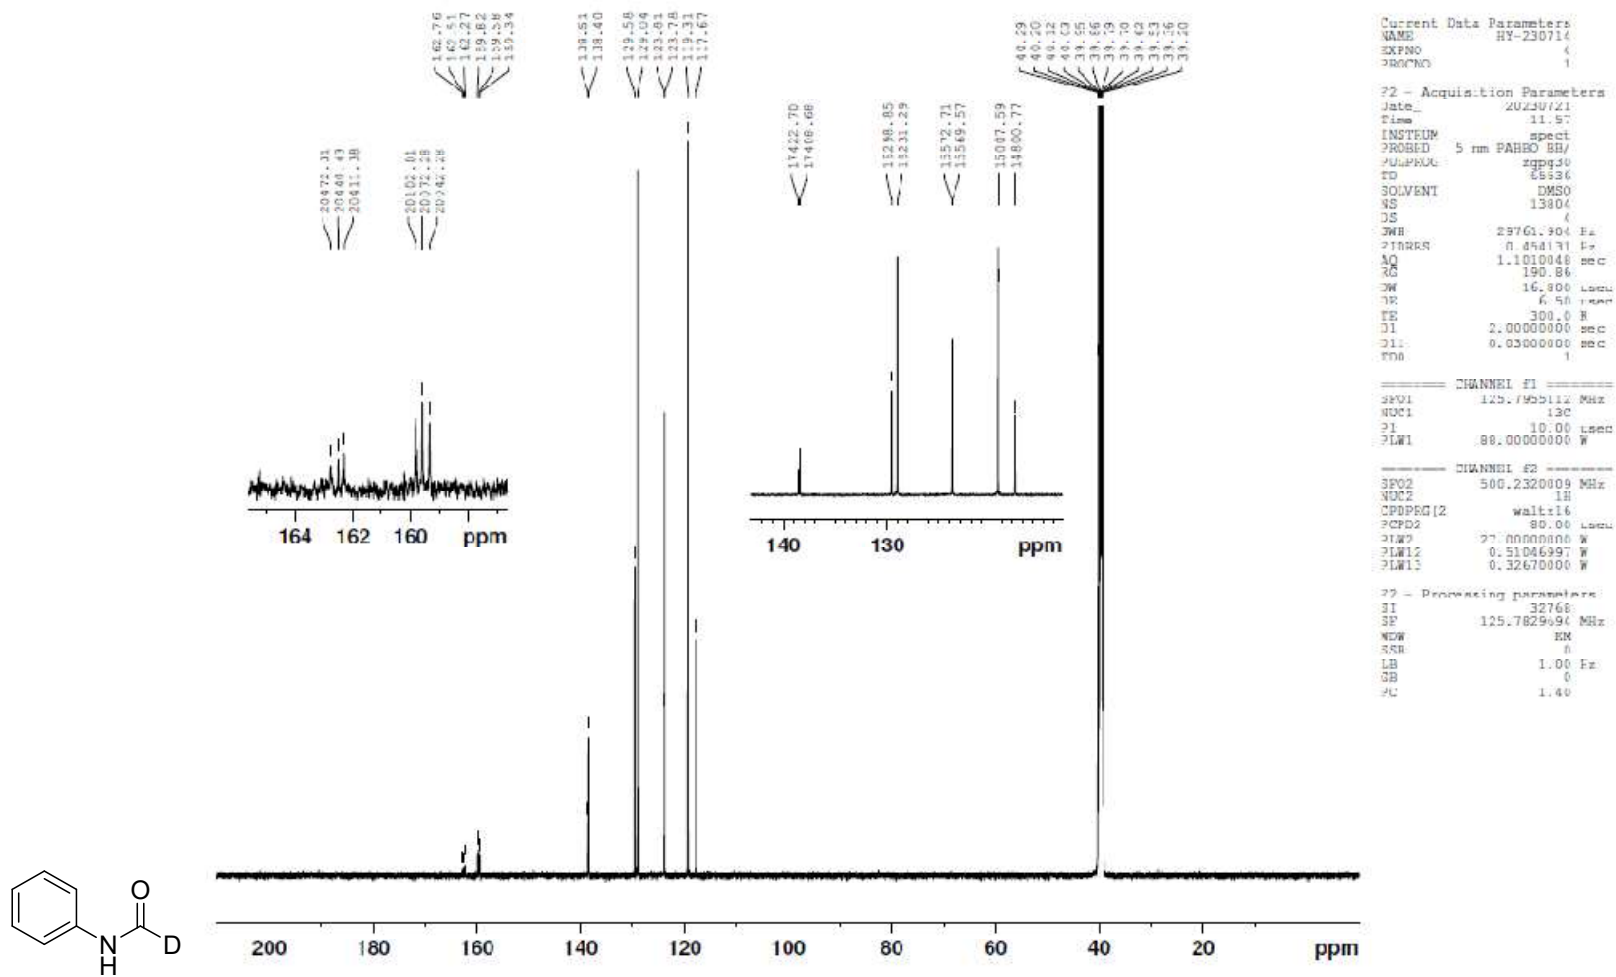

Figure S56: <sup>13</sup>C NMR Spectra of 2a-d1
